# Supplementary material for: COVID-19 symptom surveillance in immunocompromised children and young people in the UK: a prospective observational cohort study
Source: PubMed Central journal article supplement — BMJ Open. 2021 Mar 17;11(3):e044899. doi: 10.1136/bmjopen-2020-044899 (PMC7977081; doi:10.1136/bmjopen-2020-044899), 2021-03-17
Supplement: bmjopen-2020-044899.draft_revisions.pdf [file bmjopen-2020-044899.draft_revisions.pdf]

# BMJ Open

BMJ Open is committed to open peer review. As part of this commitment we make the peer review history of every article we publish publicly available.

When an article is published we post the peer reviewers' comments and the authors' responses online. We also post the versions of the paper that were used during peer review. These are the versions that the peer review comments apply to.

The versions of the paper that follow are the versions that were submitted during the peer review process. They are not the versions of record or the final published versions. They should not be cited or distributed as the published version of this manuscript.

BMJ Open is an open access journal and the full, final, typeset and author-corrected version of record of the manuscript is available on our site with no access controls, subscription charges or pay-per-view fees (<http://bmjopen.bmj.com>).

If you have any questions on BMJ Open's open peer review process please email [info.bmjopen@bmj.com](mailto:info.bmjopen@bmj.com)

# BMJ Open

## COVID-19 symptom surveillance in immunocompromised children and young people

|                               |                                                                                                                                                                                                                                                                                                                                                                                                                                                                                                                                                                                                                                                                                                                                                                                                  |
|-------------------------------|--------------------------------------------------------------------------------------------------------------------------------------------------------------------------------------------------------------------------------------------------------------------------------------------------------------------------------------------------------------------------------------------------------------------------------------------------------------------------------------------------------------------------------------------------------------------------------------------------------------------------------------------------------------------------------------------------------------------------------------------------------------------------------------------------|
| Journal:                      | <i>BMJ Open</i>                                                                                                                                                                                                                                                                                                                                                                                                                                                                                                                                                                                                                                                                                                                                                                                  |
| Manuscript ID                 | bmjopen-2020-044899                                                                                                                                                                                                                                                                                                                                                                                                                                                                                                                                                                                                                                                                                                                                                                              |
| Article Type:                 | Original research                                                                                                                                                                                                                                                                                                                                                                                                                                                                                                                                                                                                                                                                                                                                                                                |
| Date Submitted by the Author: | 22-Sep-2020                                                                                                                                                                                                                                                                                                                                                                                                                                                                                                                                                                                                                                                                                                                                                                                      |
| Complete List of Authors:     | Shaunak, Meera; NIHR Southampton Clinical Research Facility<br>Patel, Ravin; University of Southampton Faculty of Medicine<br>Driessens, Corine; University of Southampton<br>Mills, Lynne; NIHR Southampton Clinical Research Facility<br>Leahy, Alice; University Hospital Southampton NHS Foundation Trust<br>Gbesemete, Diane; NIHR Southampton Clinical Research Facility;<br>University of Southampton Faculty of Medicine<br>Owens, Daniel; NIHR Southampton Clinical Research Facility; University<br>of Southampton Faculty of Medicine<br>Lucas, JS; University Hospital Southampton NHS Foundation Trust<br>Faust, Saul; NIHR Southampton Clinical Research Facility<br>de Graaf, Hans; NIHR Southampton Clinical Research Facility; University<br>of Southampton Faculty of Medicine |
| Keywords:                     | COVID-19, PAEDIATRICS, Paediatric infectious disease & immunisation < PAEDIATRICS                                                                                                                                                                                                                                                                                                                                                                                                                                                                                                                                                                                                                                                                                                                |
|                               |                                                                                                                                                                                                                                                                                                                                                                                                                                                                                                                                                                                                                                                                                                                                                                                                  |

SCHOLARONE™  
Manuscripts

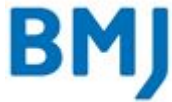

I, the Submitting Author has the right to grant and does grant on behalf of all authors of the Work (as defined in the below author licence), an exclusive licence and/or a non-exclusive licence for contributions from authors who are: i) UK Crown employees; ii) where BMJ has agreed a CC-BY licence shall apply, and/or iii) in accordance with the terms applicable for US Federal Government officers or employees acting as part of their official duties; on a worldwide, perpetual, irrevocable, royalty-free basis to BMJ Publishing Group Ltd ("BMJ") its licensees and where the relevant Journal is co-owned by BMJ to the co-owners of the Journal, to publish the Work in this journal and any other BMJ products and to exploit all rights, as set out in our [licence](#).

The Submitting Author accepts and understands that any supply made under these terms is made by BMJ to the Submitting Author unless you are acting as an employee on behalf of your employer or a postgraduate student of an affiliated institution which is paying any applicable article publishing charge ("APC") for Open Access articles. Where the Submitting Author wishes to make the Work available on an Open Access basis (and intends to pay the relevant APC), the terms of reuse of such Open Access shall be governed by a Creative Commons licence – details of these licences and which [Creative Commons](#) licence will apply to this Work are set out in our licence referred to above.

Other than as permitted in any relevant BMJ Author's Self Archiving Policies, I confirm this Work has not been accepted for publication elsewhere, is not being considered for publication elsewhere and does not duplicate material already published. I confirm all authors consent to publication of this Work and authorise the granting of this licence.

# COVID-19 symptom surveillance in immunocompromised children and young people

Meera Shaunak<sup>1\*</sup>, Ravin Patel<sup>2\*</sup>, Corine Driessens<sup>2,4</sup>, Lynne Mills<sup>1</sup>, Alice Leahy<sup>3</sup>, Diane Gbesemete<sup>1,2</sup>, Daniel Owens<sup>1,2</sup>, Jane S Lucas<sup>2,4,5</sup>, Saul N Faust<sup>1,2,5+</sup>, Hans de Graaf<sup>1,2,3+</sup>

On behalf of the ImmunoCOVID19 study group (a full list of co-authors is provided in Supplementary Online Appendix A)

\* and + Equal contribution

<sup>1</sup> NIHR Southampton Clinical Research Facility, University Hospital Southampton NHS Foundation Trust, Southampton, UK

<sup>2</sup> Faculty of Medicine and Institute for Life Sciences, University of Southampton, Southampton, UK

<sup>3</sup> Paediatric Rheumatology, University Hospital Southampton NHS Foundation Trust, Southampton, UK

<sup>4</sup> PCD Centre, University Hospital Southampton NHS Foundation Trust, Southampton, UK

<sup>5</sup> NIHR Southampton Biomedical Research Centre, University Hospital Southampton NHS Foundation Trust

**Corresponding author:** Dr Hans de Graaf [h.de-graaf@soton.ac.uk](mailto:h.de-graaf@soton.ac.uk), Paediatric Rheumatology, University Hospital Southampton NHS Foundation Trust, Tremona Road, Southampton, SO16 6YD

**Word count:** 1761 (excluding title page, abstract, summary box, references, figures and tables)

**Keywords:** SARS-CoV-2, symptoms, children, immunocompromise

## ABSTRACT

**Objectives:** To assess the frequency and severity of SARS-CoV-2 infection in immunocompromised children and young people in the United Kingdom during the SARS-CoV-2 pandemic.

**Design:** A prospective observational cohort study.

**Setting:** 46 centres across the United Kingdom between 16<sup>th</sup> March and 4<sup>th</sup> July 2020. A weekly online questionnaire based on the ISARIC-WHO Case Report Form was used to collect participant reported data on symptoms, test results, NHS attendance, hospital admission and impact on daily life.

**Participants:** 1490 immunocompromised children, defined as those requiring an annual influenza vaccination due to their underlying condition or medication.

**Main outcome measures:** Incidence of SARS-CoV-2 infection, incidence of SARS-CoV-2 related symptoms and impact on health services and wellbeing.

**Results:** The median age was 11 years (range 0 – 18 years), 54.4% were female. The most common primary diagnoses were rheumatological (41.1%), immunodeficiency (7.9%) and solid organ or bone marrow transplant diagnoses (6%). Methotrexate (25.9%), anti-TNF therapy (20.3%) and corticosteroids (16.7%) were most commonly prescribed. 922 (67.4%) participants reported at least one symptom consistent with suspected SARS-CoV-2 infection over the study period. 476 (34.8%) reported three or more symptoms. 110 symptomatic participants underwent a test for SARS-CoV-2. All were negative. The frequency of cough, blocked nose and sore throat decreased in both airways and non-airways disease participants over the study period. This trend was more marked in those with airways disease. 53 participants attended the NHS and 2 were admitted to hospital. Reported parental anxiety scores remained extremely high throughout the study period.

**Conclusions:** There were no positive tests for SARS-CoV-2 infection, although symptoms suggestive of SARS-CoV-2 were common. This implies that either self and family isolation (shielding) measures have been effective, or similar to healthy children, immunocompromised children are less affected by SARS-CoV-2 infection than adults. Anxiety about SARS-CoV-2 infection remains extremely high.

**Trial registration:** NCT04382508

**Strengths**

- First study to monitor a cohort of immunocompromised children of this size (1490 participants)
- The study period encompasses the height of the epidemic in the UK and subsequent lockdown period.

**Limitations**

- Self-reported information is unverified by clinical review
- Inconsistent completion of weekly questionnaires over the study period although this is offset by high median response rate (83%)

**SUMMARY BOX****What is already known on this topic**

- Fewer cases of SARS-CoV-2 infection have been reported in children and young people compared to adults.
- However, information on SARS-CoV-2 prevalence, progression and outcome in this age group is still limited.
- In addition, whether children and young people with pre-existing co-morbidities are more likely to contract SARS-CoV-2 infection remains unclear.

**What this study adds**

- There were no positive tests for SARS-CoV-2 infection in a large cohort of 1490 immunocompromised children and young people between March and July 2020.
- The frequency of cough, blocked nose and sore throat decreased during this time period, suggesting that shielding measures may have been effective in reducing the transmission of respiratory viruses in these individuals.
- Parents of immunocompromised children and young people report high levels of anxiety regarding SARS-CoV-2 infection.

## INTRODUCTION

The 2019 coronavirus pandemic (COVID-19) is an ongoing global health crisis with over 11,500,000 cases and in excess of 500,000 deaths worldwide. The illness is caused by severe acute respiratory syndrome coronavirus 2 (SARS-CoV-2). As of 5<sup>th</sup> August 2020, the World Health Organisation (WHO) reported 306,297 cumulative cases of confirmed SARS-CoV-2 infection in the United Kingdom (UK) population of 68.1 million, giving a cumulative incidence of 0.004% [1].

SARS-CoV-2 causes mild or moderate upper respiratory tract infection in the majority of children, with fever and cough being the most common symptoms, although many are asymptomatic [2]. In children, fewer cases of SARS-CoV-2 infection have been reported compared to adults [3]. However, it remains unclear how many children in the community have been infected, with the results of seroprevalence studies awaited [4].

Data demonstrating an increased risk of severe disease in immunocompromised adults are emerging (A. Richter, personal communication, publication submitted). Children with significant co-morbidities are also currently considered to be at higher risk of severe infection. They were given specific precautionary advice when UK lockdown was applied, to slow the spread of SARS-CoV-2, on 23<sup>rd</sup> March 2020 [5,6].

The primary objective of this study is to assess the frequency and severity of SARS-CoV-2 infection in immunocompromised children and young people, a subset of the population in whom there is limited reported data.

## METHODS

In this prospective cohort study, immunocompromised patients under 18 years were identified by the clinical teams at 46 centres across the UK. Children and young people were considered to be immunocompromised if they required an annual influenza vaccination due to their underlying condition or medication. Study design

1  
2  
3 included patient and public involvement (PPI). Parents of children on  
4 immunosuppressive drugs were asked about their willingness to participate in such a  
5 study and whether they had any specific questions or anxieties.  
6  
7  
8  
9

10 Parents and participants were sent age-appropriate patient information sheets and  
11 asked to complete an online consent form. If they did not reply after receiving  
12 electronic reminders in the following three weeks, they were removed from the study  
13 database. Following completion of online consent, participants were sent a weekly  
14 online questionnaire based on the International Severe Acute Respiratory and  
15 emerging Infections Consortium (ISARIC) and WHO COVID-19 Case Report Form  
16 [7], with questions also incorporating PPI feedback (Supplementary Online Appendix  
17 B: Weekly questionnaire). Depending on the age and ability of the child or young  
18 person, questionnaires were either completed by the participant or their parent or  
19 carer.  
20  
21  
22  
23  
24  
25  
26  
27  
28

29 From 16<sup>th</sup> March 2020, information was collected regarding symptom presentation,  
30 test results, NHS attendance, hospital admission and the effects of COVID-19 on  
31 daily life. Loss of smell or taste was added to the weekly questionnaire at week 14  
32 following emerging evidence for anosmia and ageusia in COVID-19 disease. Study  
33 recruitment closed on 4<sup>th</sup> July 2020. Data collection is ongoing and follow up is  
34 planned to continue for 12 months. The study was approved by the Leeds NHS  
35 Research Ethics Committee (IRAS 281544).  
36  
37  
38  
39  
40  
41  
42

### 43 **Statistical Analysis**

44  
45 Longitudinal data were collected as participants were asked to complete a weekly  
46 online questionnaire for one year. We report data up to the 4<sup>th</sup> July 2020, when  
47 lockdown restrictions in the UK were eased. All questionnaire data collected over this  
48 16 week study period were included in the analysis, although some participants did  
49 not complete the questionnaire every week. Participants who did not complete any  
50 questionnaires were not included in the analysis. Analysis assumed that the date of  
51 entry into the study was the date of the first completed questionnaire. Data were  
52 cleaned and analysed every week and a top level report provided to NHS  
53  
54  
55  
56  
57  
58  
59  
60



1  
2  
3 England and the Royal College of Paediatrics and Child Health (RCPCH). The  
4 descriptive statistics presented in this paper were analysed using SAS9.4.  
5  
6  
7

## 8 **RESULTS**

9

10  
11 Recruitment increased over the 16 week study period (Figure 1). By week 16, 1490  
12 eligible patients or their parents had consented. Weekly online questionnaire  
13 response rate varied between 74% and 100% (Figure 1). The median age of  
14 participants was 11 years (range 0 – 18 years). 54.5% of participants were female.  
15  
16 Baseline characteristics of participants are shown in Table 1.  
17  
18  
19  
20  
21  
22  
23  
24  
25  
26  
27  
28  
29  
30  
31  
32  
33  
34  
35  
36  
37  
38  
39  
40  
41  
42  
43  
44  
45  
46  
47  
48  
49  
50  
51  
52  
53  
54  
55  
56  
57  
58  
59  
60

**Table 1: Baseline characteristics: primary diagnosis and medication**

|                                                | Male<br>n (%)      | Female<br>n (%)    | Total<br>n (%)     |
|------------------------------------------------|--------------------|--------------------|--------------------|
| <b>Primary diagnosis:</b>                      |                    |                    |                    |
| Juvenile idiopathic arthritis                  | 140 (20.6%)        | 314 (38.7%)        | 454 (30.5%)        |
| Other rheumatological diagnoses                | 48 (7.1%)          | 110 (13.6%)        | 158 (10.6%)        |
| Immunodeficiency disorders                     | 64 (9.4%)          | 53 (6.5%)          | 117 (7.9%)         |
| Solid organ or bone marrow transplant          | 53 (7.8%)          | 36 (4.4%)          | 89 (6.0%)          |
| Renal disease                                  | 56 (8.2%)          | 27 (3.3%)          | 83 (5.6%)          |
| Malignant haematology & oncological diagnoses  | 51 (7.5%)          | 28 (3.5%)          | 79 (5.3%)          |
| Airways disease                                | 29 (4.3%)          | 24 (3.0%)          | 53 (3.6%)          |
| Inflammatory bowel disease                     | 29 (4.3%)          | 23 (2.8%)          | 52 (3.5%)          |
| Diabetes                                       | 30 (4.4%)          | 19 (2.3%)          | 49 (3.3%)          |
| Neurological diagnoses                         | 20 (2.9%)          | 10 (1.2%)          | 30 (2.0%)          |
| Other gastroenterology & hepatology diagnoses  | 7 (1.0%)           | 12 (1.5%)          | 19 (1.3%)          |
| Other                                          | 26 (3.8%)          | 34 (4.2%)          | 60 (4.0%)          |
| Missing diagnosis                              | 126 (18.6%)        | 121 (14.9%)        | 247 (16.6%)        |
| <b>Total</b>                                   | <b>679 (45.6%)</b> | <b>811 (54.4%)</b> | <b>1490 (100%)</b> |
| <b>Medication:</b>                             |                    |                    |                    |
| Methotrexate                                   | 137 (20.2%)        | 249 (30.7%)        | 386 (25.9%)        |
| Anti-TNF therapy                               | 101 (14.9%)        | 202 (24.9%)        | 303 (20.3%)        |
| Corticosteroids                                | 134 (19.7%)        | 115 (14.2%)        | 249 (16.7%)        |
| Other antibiotics and antivirals               | 105 (15.5%)        | 63 (7.8%)          | 168 (11.3%)        |
| Calcineurin inhibitors                         | 87 (12.8%)         | 71 (8.8%)          | 158 (10.6%)        |
| Mycophenolate mofetil (MMF)                    | 64 (9.4%)          | 67 (8.3%)          | 131 (8.8%)         |
| Other disease modifying anti-rheumatic drugs   | 56 (8.2%)          | 53 (6.5%)          | 109 (7.3%)         |
| Inhalers                                       | 46 (6.8%)          | 40 (4.9%)          | 86 (5.8%)          |
| Insulin                                        | 46 (6.8%)          | 36 (4.4%)          | 82 (5.5%)          |
| Non-steroidal anti-inflammatory drugs (NSAIDs) | 21 (3.1%)          | 51 (6.3%)          | 72 (4.8%)          |
| Chemotherapy                                   | 41 (6.0%)          | 27 (3.3%)          | 68 (4.6%)          |
| Azithromycin                                   | 40 (5.9%)          | 28 (3.5%)          | 68 (4.6%)          |
| Hydroxychloroquine                             | 11 (1.6%)          | 44 (5.4%)          | 55 (3.7%)          |
| Tocilizumab                                    | 16 (2.4%)          | 33 (4.1%)          | 49 (3.3%)          |
| Intravenous or subcutaneous immunoglobulin     | 21 (3.1%)          | 17 (2.1%)          | 38 (2.6%)          |
| Other biologic drugs                           | 14 (2.1%)          | 22 (2.7%)          | 36 (2.4%)          |
| <b>Total</b>                                   | <b>679</b>         | <b>811</b>         | <b>1490</b>        |

1  
2  
3 Information regarding primary diagnosis was incomplete for 247 (16.6%)  
4 participants. Of 1368 participants who completed at least one weekly online  
5 questionnaire, 922 (67.4%) reported at least one symptom consistent with suspected  
6 SARS-CoV-2 infection over the study period. 476 (34.8%) reported 3 or more  
7 simultaneous symptoms. The most frequently reported symptoms included joint pain,  
8 fatigue, headache, nausea and muscle pain. Symptoms according to primary  
9 diagnosis and medication can be found in Supplementary Online Appendix C.  
10  
11  
12  
13  
14  
15  
16

17 Heat map visualisation of the dataset suggests a degree of association between  
18 certain symptom pairs (Figure 2a). The frequency of cough, blocked nose and sore  
19 throat decreased in both airways and non-airways disease participants over the  
20 study period (Figure 2b and 2c). This trend was more marked in those with airways  
21 disease (Figure 2b).  
22  
23  
24  
25  
26

27 53 participants (3.9%) visited primary or secondary NHS care due to concerns about  
28 SARS-CoV-2 infection, of whom 47 (88.7%) reported symptoms. Two participants  
29 were admitted to hospital. 135 participants (9.9%) underwent a viral PCR test for  
30 SARS-CoV-2 infection. 110 of these reported symptoms. None of the study  
31 participants tested positive for SARS-CoV-2 infection. 137 participants had their  
32 medication suspended or changed during the study period, of whom 117 (85.4%)  
33 reported symptoms.  
34  
35  
36  
37  
38  
39  
40

41 Figure 3a illustrates relatively static low school attendance over the 16 week study  
42 period, during which schools were closed to the majority of children. 62% of  
43 questionnaire respondents reported high levels of anxiety (scores of 7 to 10 out of  
44 10) at the start of the study, with anxiety levels remaining extremely high throughout  
45 (Figure 3b). With the easing of lockdown restrictions in July 2020, anxiety themes  
46 included concerns regarding the severity of SARS-CoV-2 infection, the re-opening of  
47 schools and a second wave of infection.  
48  
49  
50  
51  
52  
53

## 54 **DISCUSSION**

55 While 922 (67.4%) participants reported one or more symptoms consistent with  
56 suspected SARS-CoV-2 infection, no participant tested positive for SARS-CoV-2,  
57  
58  
59  
60

1  
2  
3 suggesting an absence of symptom specificity [2] and emphasising that these  
4 patients did not have severe SARS-CoV-2 infection needing hospital admission. This  
5 study period encompassed the peak in confirmed SARS-CoV-2 cases in the UK,  
6 during which time many immunocompromised children were shielding. In addition,  
7 during the initial weeks of the outbreak, viral PCR tests were only performed if a child  
8 was admitted to hospital. As only 9.9% of participants were tested, some cases of  
9 mild SARS-CoV-2 disease may have been missed.

10  
11  
12 In the UK, of the 651 children with laboratory confirmed SARS-CoV-2, between 17<sup>th</sup>  
13 January and 3<sup>rd</sup> July 2020, 375 (57.6%) did not have an underlying co-morbidity [8].  
14 In the United States, the majority of children admitted to intensive care with SARS-  
15 CoV-2 infection had a pre-existing co-morbidity [9]. However, the contribution of co-  
16 morbidity to SARS-CoV-2 disease severity remains unclear due to the low  
17 prevalence of severe disease in this age group [10]. Limited data for paediatric  
18 oncology, liver transplant, chronic kidney disease (CKD) and inflammatory bowel  
19 disease (IBD) patients is reassuring, with few cases of mostly mild infection reported  
20 [11-14].

21  
22  
23 The fact that the frequency of cough, blocked nose and sore throat decreased in  
24 both airways and non-airways disease participants over the study period suggests  
25 that shielding measures may have been effective in reducing the transmission of  
26 respiratory viruses in these children [15]. Overall, participants showed few symptoms  
27 specific for SARS-CoV-2 disease, had few hospital admissions and had no positive  
28 tests for SARS-CoV-2 infection. This was despite the study period occurring at the  
29 height of the pandemic in the UK, which may also suggest that similar to healthy  
30 children, immunocompromised children are less affected by SARS-CoV-2 infection  
31 than adults [16].

32  
33  
34 Only 53 participants sought NHS attention and only two were admitted to hospital, in  
35 keeping with reports that the proportion of vulnerable paediatric inpatients has  
36 significantly decreased during the pandemic [17]. This implies that either families  
37 were successfully managing minor or chronic symptoms at home, or they were not  
38 accessing healthcare appropriately. A decrease in attendances to Paediatric  
39  
40  
41  
42  
43  
44  
45  
46  
47  
48  
49  
50  
51  
52  
53  
54  
55  
56  
57  
58  
59  
60

1  
2  
3 Emergency Departments has been reported in the UK following the start of the  
4 pandemic [18]. While concerns were initially raised about delayed presentations of  
5 serious illness [19], a formal survey found this to be rare [20]. It may also be possible  
6 that the reduction in “normal” upper and lower respiratory infection transmission  
7 prevented by self-isolation and increased hand hygiene, during the lockdown period  
8 has had the indirect effect of also reducing other reported minor or chronic  
9 symptoms in this cohort.  
10  
11  
12  
13  
14  
15  
16

17 More than 50% of questionnaire respondents reported high levels of anxiety at the  
18 start of the study, similar to national figures [21]. However, anxiety scores remained  
19 extremely high during this study, whereas average anxiety scores nationally reduced  
20 from 5.2 to 4.0 out of 10 by May 2020 [21]. With the advice to stop shielding from  
21 31<sup>st</sup> July 2020, the planned re-opening of schools in September 2020 and  
22 uncertainty regarding a second wave of infection, these families require up-to-date,  
23 evidence-based guidance on the need for specific precautionary measures. If such  
24 evidence is not available, a holistic, child-centred approach must be taken by  
25 clinicians on a case by case basis [6].  
26  
27  
28  
29  
30  
31  
32  
33

34 Study limitations include patient or parent reported information, unverified by clinical  
35 review. Inconsistent completion of weekly questionnaires over the study period may  
36 have affected the data, although a median response rate of 83% (range 74% to  
37 100%) is high for a questionnaire study. Over-reporting of symptoms may have  
38 occurred particularly as anxiety levels were high. Under-reporting of symptoms may  
39 also have occurred due to the nature of the study, which required weekly  
40 participation.  
41  
42  
43  
44  
45  
46  
47

48 Information on SARS-CoV-2 prevalence, progression and outcomes in children is  
49 still limited, with the results of national surveillance programmes awaited. Whether  
50 children with pre-existing co-morbidities are more likely to contract SARS-CoV-2  
51 infection remains unclear. Further research is warranted to identify risk factors for  
52 severe infection in children and young people to aid health service planning, improve  
53 public health messaging and minimise unforeseen consequences of imposed  
54 restrictions on child health and wellbeing.  
55  
56  
57  
58  
59  
60

1  
2  
3 In conclusion, this is the first study to prospectively observe a cohort of  
4 immunocompromised paediatric patients during the COVID-19 pandemic. We report  
5 results from a large cohort of 1490 patients over 16 weeks. Although symptoms  
6 indicative of SAR-CoV-2 infection were common in this cohort of  
7 immunocompromised children and young people, there were no positive tests for  
8 SARS-CoV-2 infection. Shielding measures appear to have been effective at  
9 reducing the frequency of respiratory tract symptoms. Despite this, parents remain  
10 very anxious, highlighting the pressing need to clearly define and communicate  
11 SARS-CoV-2 risk in children and young people.  
12  
13  
14  
15  
16  
17  
18  
19  
20  
21  
22  
23  
24  
25  
26  
27  
28  
29  
30  
31  
32  
33  
34  
35  
36  
37  
38  
39  
40  
41  
42  
43  
44  
45  
46  
47  
48  
49  
50  
51  
52  
53  
54  
55  
56  
57  
58  
59  
60

1  
2  
3 **Contributorship statement:** MS, RP and HdG drafted and revised the manuscript.  
4 All authors reviewed and approved the final manuscript as submitted. All authors  
5 contributed to the recruitment of participants.  
6  
7  
8  
9

10 **Acknowledgements:** We would like to acknowledge all the children, young people  
11 and parents participating in this study. This study was badged as a UK NIHR Urgent  
12 Public Health Study and we would also like to thank the NIHR Clinical Research  
13 Network (CRN) and all associated NIHR Local CRNs and site staff who supported  
14 recruitment.  
15  
16  
17  
18  
19

20 **Funding:** The study was funded by the British Paediatric Allergy Immunity and  
21 Infection Group (BPAIIG) and SNF's NIHR Senior Investigator Award. SNF, MS and  
22 DO are funded in part by the NIHR Southampton Clinical Research Facility.  
23 Additional project management and information technology support was provided by  
24 the staff and resources of the NIHR Southampton Clinical Research Facility.  
25  
26  
27  
28  
29

30 **Competing interests:** All authors have completed the *ICMJE* uniform disclosure  
31 form at [www.icmje.org/coi\\_disclosure.pdf](http://www.icmje.org/coi_disclosure.pdf). HdG received grant funding from the  
32 BPAIIG for the submitted work; there are no other relationships or activities that  
33 could appear to have influenced the submitted work.  
34  
35  
36  
37  
38

39 **Dissemination declaration:** We plan to disseminate the results to study participants  
40 and their parents.  
41  
42  
43  
44

45 **Data sharing statement:** Research data may be made available upon reasonable  
46 request, wherever legally and ethically possible.  
47  
48  
49  
50

51 **Transparency declaration:** The Corresponding Author affirms that the manuscript  
52 is an honest, accurate and transparent account of the study being reported. No  
53 important aspects of the study have been omitted. Any discrepancies from the study  
54 as planned have been explained.  
55  
56  
57  
58  
59  
60

1  
2  
3 **Exclusive License Statement:** The Corresponding Author has the right to grant on  
4 behalf of all authors and does grant on behalf of all authors, [a worldwide licence](#) to  
5 the Publishers and its licensees in perpetuity, in all forms, formats and media  
6 (whether known now or created in the future), to i) publish, reproduce, distribute,  
7 display and store the Contribution, ii) translate the Contribution into other languages,  
8 create adaptations, reprints, include within collections and create summaries,  
9 extracts and/or, abstracts of the Contribution, iii) create any other derivative work(s)  
10 based on the Contribution, iv) to exploit all subsidiary rights in the Contribution, v) the  
11 inclusion of electronic links from the Contribution to third party material where-ever it  
12 may be located; and, vi) licence any third party to do any or all of the above.  
13  
14  
15  
16  
17  
18  
19  
20  
21  
22  
23  
24  
25  
26  
27  
28  
29  
30  
31  
32  
33  
34  
35  
36  
37  
38  
39  
40  
41  
42  
43  
44  
45  
46  
47  
48  
49  
50  
51  
52  
53  
54  
55  
56  
57  
58  
59  
60



1  
2  
3 **Figure 1: Study recruitment and weekly questionnaire response rate**  
4  
5

6 **Figure 2: Heat map depicting association of reported symptoms during the**  
7 **study period**  
8

9 Scale of 0 – 800 representing cumulative frequency of simultaneously reported  
10 symptoms over the study period  
11  
12

13  
14 **Figure 3: Reported symptoms in airways disease patients over time**  
15  
16

17  
18 **Figure 4: Reported symptoms in non-airways disease patients over time**  
19  
20

21  
22 **Figure 5: Reported school attendance over time**  
23  
24

25 **Figure 6: Reported anxiety levels over time**  
26

27 Anxiety scores out of 10 categorised into mild (1 to 3), moderate (4 to 6) and severe  
28 (7 to 10) anxiety, with a score of 0 indicating no anxiety.  
29  
30  
31  
32  
33  
34  
35  
36  
37  
38  
39  
40  
41  
42  
43  
44  
45  
46  
47  
48  
49  
50  
51  
52  
53  
54  
55  
56  
57  
58  
59  
60

## REFERENCES

- 1 <https://covid19.who.int/region/euro/country/gb> (accessed August 2020)
- 2 Assaker R, Colas A-E, Julien-Marsollier F, et al. Presenting symptoms of COVID-19 in children: a meta-analysis of published studies. *Br J Anaesth* 2020.  
3 [https://bjanaesthesia.org/article/S0007-0912\(20\)30408-6/abstract](https://bjanaesthesia.org/article/S0007-0912(20)30408-6/abstract) (accessed July 2020).
- 4 Wu Z, McGoogan JM. Characteristics of and Important Lessons From the Coronavirus Disease 2019 (COVID-19) Outbreak in China: Summary of a Report of 72 314 Cases From the Chinese Center for Disease Control and Prevention. *JAMA* 2020;323(13):1239–42.
- 5 Ladhani SN, Amin-Chowdhury Z, Amirthalingam G, et al. Prioritising paediatric surveillance during the COVID-19 pandemic. *Arch Dis Child* 2020;105(7):613–5.
- 6 <https://www.gov.uk/government/publications/guidance-on-shielding-and-protecting-extremely-vulnerable-persons-from-covid-19/covid-19-guidance-for-young-people-on-shielding-and-protecting-people-most-likely-to-become-unwell-if-they-catch-coronavirus> (accessed July 2020).
- 7 COVID-19 rapid guideline: children and young people who are immunocompromised. NICE guideline [NG174]. 2020.  
8 <https://www.nice.org.uk/guidance/ng174> (accessed July 2020).
- 9 <https://isaric.tghn.org/COVID-19-CRF/> (accessed July 2020).
- 10 Swann OV, Holden, KA, Turtle L, et al. Clinical characteristics of children and young people admitted to hospital with covid-19 in United Kingdom: prospective multicentre observational cohort study. *BMJ* 2020;370:m3249

1  
2  
3 9 Shekerdemian LS, Mahmood NR, Wolfe KK, et al. Characteristics and Outcomes  
4 of Children With Coronavirus Disease 2019 (COVID-19) Infection Admitted to US  
5 and Canadian Pediatric Intensive Care Units. *JAMA Pediatr* 2020.

6  
7  
8 <https://jamanetwork.com/journals/jamapediatrics/fullarticle/2766037> (accessed July  
9 2020).

10  
11  
12  
13 10 Docherty AB, Harrison EM, Green CA, et al. Features of 20 133 UK patients in  
14 hospital with covid-19 using the ISARIC WHO Clinical Characterisation Protocol:  
15 prospective observational cohort study. *BMJ* 2020;369:m1985.

16  
17  
18  
19  
20 11 Ferrari A, Zecca M, Rizzari C, et al. Children with cancer in the time of COVID-19:  
21 An 8-week report from the six pediatric onco-hematology centers in Lombardia, Italy.  
22 *Pediatr Blood Cancer* 2020;67(8):e28410.

23  
24  
25  
26  
27 12 D'Antiga L. Coronaviruses and Immunosuppressed Patients: The Facts During  
28 the Third Epidemic. *Liver Transpl* 2020;26(6):832–4.

29  
30  
31  
32  
33 13 Turner D, Huang Y, Martín-de-Carpi J, et al. Corona Virus Disease 2019 and  
34 Paediatric Inflammatory Bowel Diseases: Global Experience and Provisional  
35 Guidance (March 2020) from the Paediatric IBD Porto Group of European Society of  
36 Paediatric Gastroenterology, Hepatology, and Nutrition. *J Pediatr Gastroenterol Nutr*  
37 2020;70(6):727–33.

38  
39  
40  
41  
42  
43 14 Plumb L, Benoy-Deeney F, Casula A et al. COVID-19 in children with chronic  
44 kidney disease: findings from the UK renal registry. *Arch Dis Child* 2020.  
45 <https://adc.bmj.com/content/early/2020/07/24/archdischild-2020-319903> (accessed  
46 July 2020)

47  
48  
49  
50  
51 15 Chan KH, Lee P, Chan CY, et al. Monitoring respiratory infections in covid-19  
52 epidemics. *BMJ* 2020;369:m1628.

53  
54  
55  
56 16 Mehta NS, Mytton OT, Mullins EWS, et al. SARS-CoV-2 (COVID-19): What do we  
57 know about children? A systematic review. *Clin Infect Dis* 2020.

1  
2  
3 <https://academic.oup.com/cid/article/doi/10.1093/cid/ciaa556/5835843> (accessed  
4  
5 July 2020).

6  
7  
8 17 Issitt R, Booth J, Bryant W, et al. Coronavirus (COVID-19) infection in children at  
9 a specialist centre: outcome and implications of underlying high-risk comorbidities in  
10 a paediatric population. *medRxiv* 2020.05.20.

11  
12  
13  
14  
15 18 Isba R, Edge R, Jenner R, et al. Where have all the children gone? Decreases in  
16 paediatric emergency department attendances at the start of the COVID-19  
17 pandemic of 2020. *Arch Dis Child* 2020;105(7):704–704.

18  
19  
20  
21  
22 19 Lynn RM, Avis JL, Lenton S, et al. Delayed access to care and late presentations  
23 in children during the COVID-19 pandemic: a snapshot survey of 4075 paediatricians  
24 in the UK and Ireland. *Arch Dis Child* 2020.

25  
26  
27  
28 <https://adc.bmj.com/content/early/2020/06/24/archdischild-2020-319848> (accessed  
29  
30 July 2020)

31  
32  
33 20 Roland D, Harwood R, Bishop N, et al. Children's emergency presentations  
34 during the COVID-19 pandemic. *Lancet Child Adolesc Health* 2020;4(8):e32–3.

35  
36  
37  
38 21 Coronavirus (COVID-19) Infection Survey pilot - Office for National Statistics.  
39 [https://www.ons.gov.uk/peoplepopulationandcommunity/healthandsocialcare/conditio  
40 nsanddiseases/bulletins/coronaviruscovid19infectionsurveypilot/latest#incidence-rate](https://www.ons.gov.uk/peoplepopulationandcommunity/healthandsocialcare/conditionsanddiseases/bulletins/coronaviruscovid19infectionsurveypilot/latest#incidence-rate)  
41  
42  
43 (accessed July 2020).

1  
2  
3  
4  
5  
6  
7  
8  
9  
10  
11  
12  
13  
14  
15  
16  
17  
18  
19  
20  
21  
22  
23  
24  
25  
26  
27  
28  
29  
30  
31  
32  
33  
34  
35  
36  
37  
38  
39  
40  
41  
42  
43  
44  
45  
46  
47  
48  
49  
50  
51  
52  
53  
54  
55  
56  
57  
58  
59  
60

For peer review only

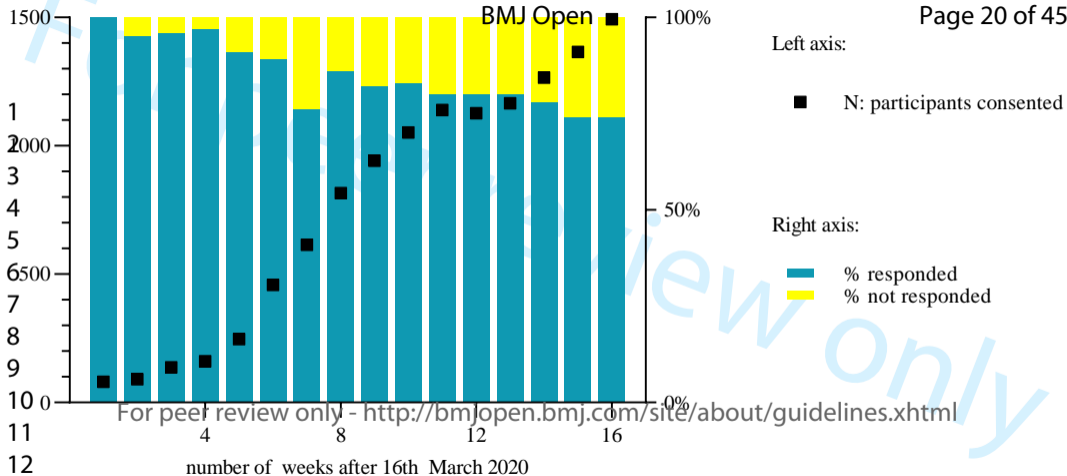

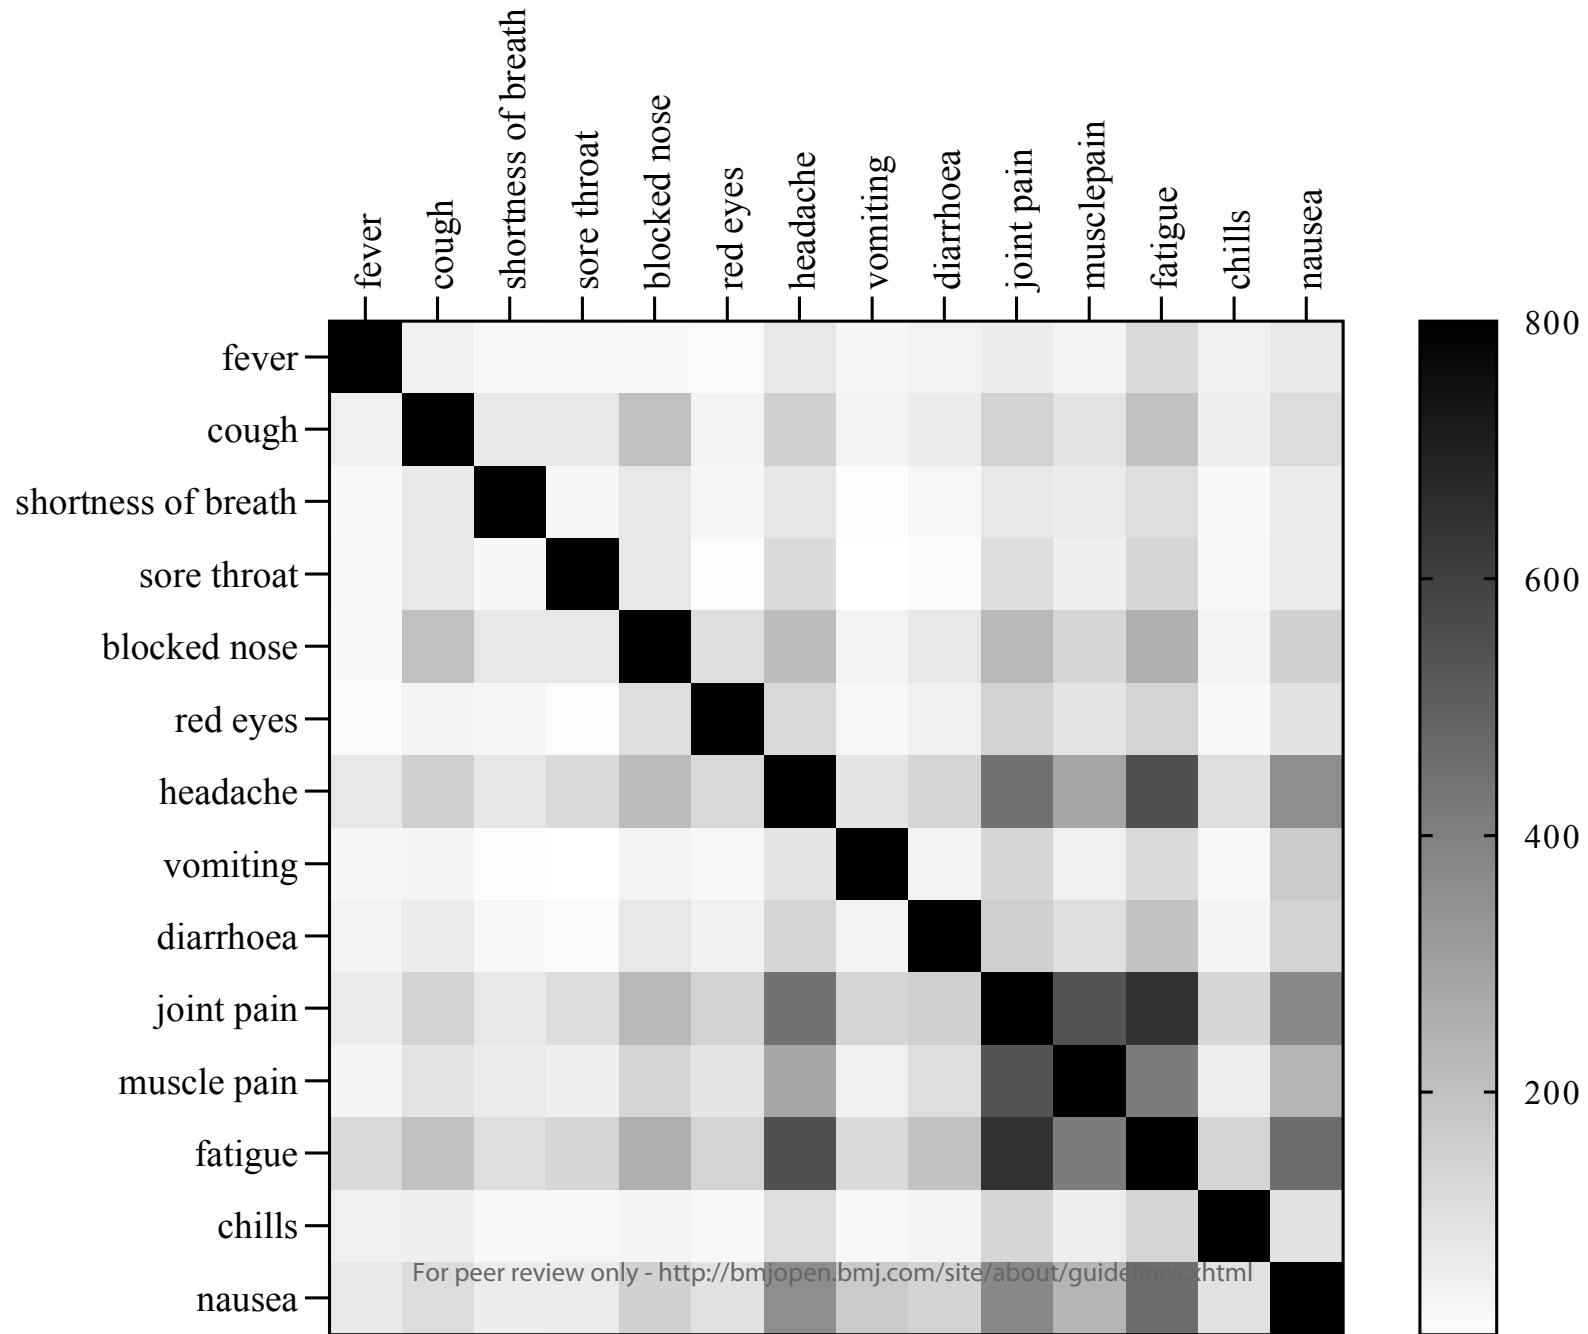

1  
2  
3  
4  
5  
6  
7  
8  
9  
10  
11  
12  
13  
14  
15  
16  
17  
18  
19  
20  
21  
22  
23  
24  
25  
26  
27  
28  
29  
30  
31  
32  
33  
34  
35  
36  
37  
38  
39  
40  
41

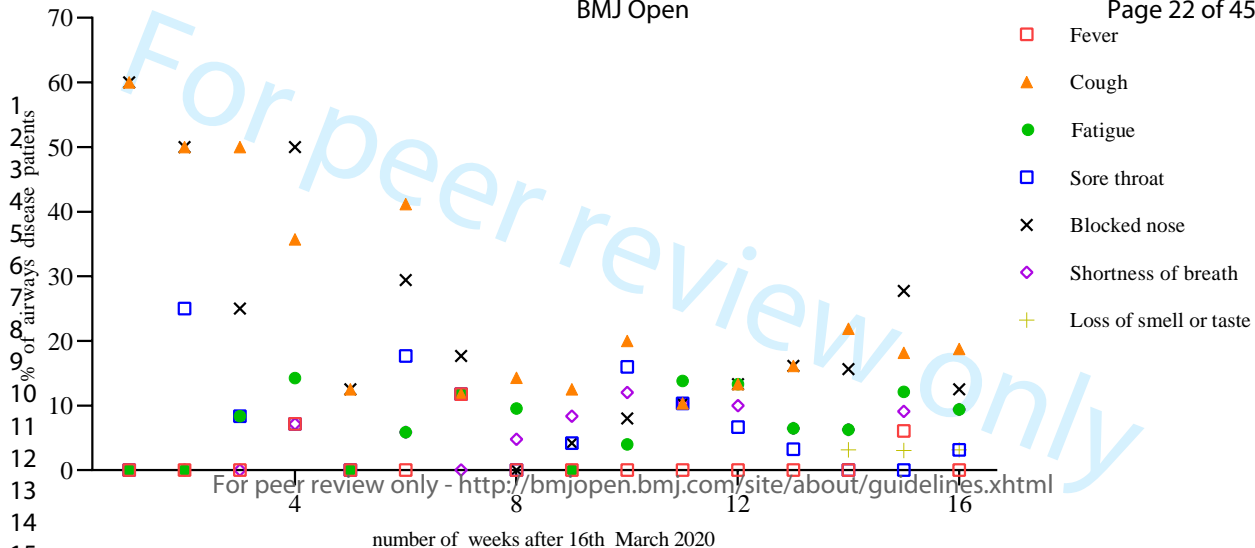



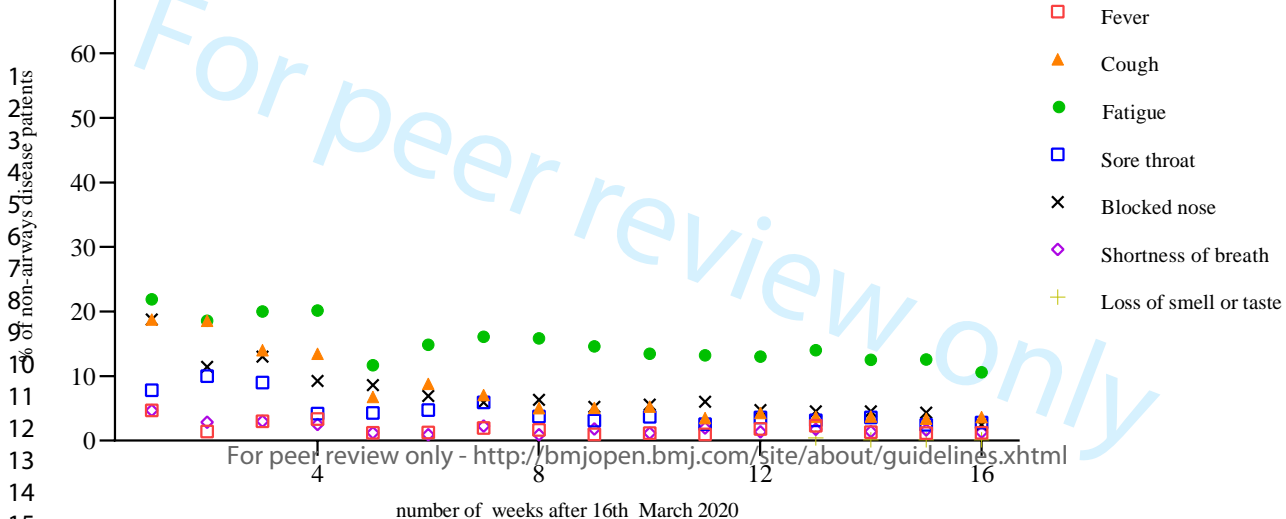

BMJ Open

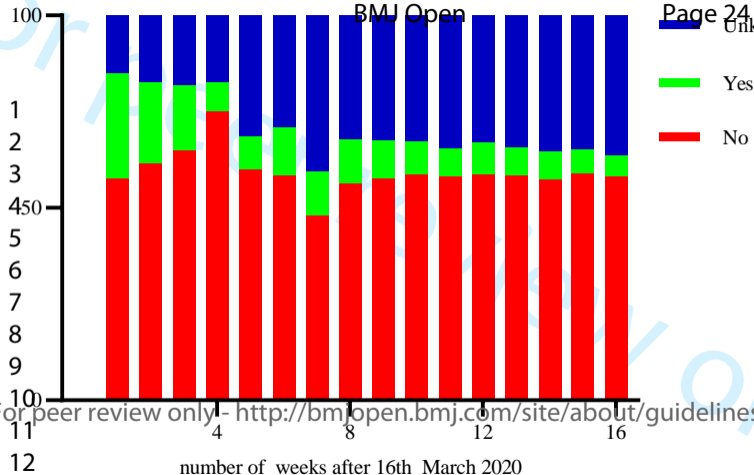

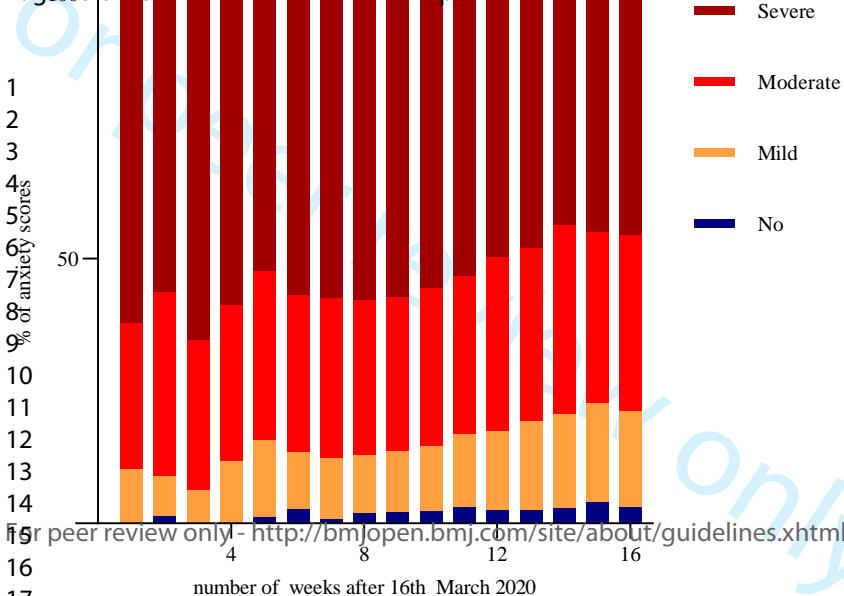

## Appendix A: List of ImmunoCOVID19 Study Group Co-authors

|      |                         |                                                      |                                                                                                                                                                            |                                                                                                                  |
|------|-------------------------|------------------------------------------------------|----------------------------------------------------------------------------------------------------------------------------------------------------------------------------|------------------------------------------------------------------------------------------------------------------|
| Dr   | Hesham Abdalla          | Consultant Paediatrician                             | Walsall Healthcare NHS Trust                                                                                                                                               | Moat Road, Walsall WS2 9PA                                                                                       |
| Ms   | Daniella Adams          | Clinical Nurse Specialist<br>Paediatric Rheumatology | Evelina London Children's Hospital, Guy's and St Thomas' NHS Foundation Trust                                                                                              | Westminster Bridge Road London, SE1 7EH                                                                          |
| Dr   | Nadeem A Afzal          | Consultant Paediatric Gastroenterologist             | Department of Paediatric Gastroenterology, Southampton Children's Hospital                                                                                                 | Tremona Road, Southampton, SO16 6YD                                                                              |
| Mr   | Nicolas Aldridge        | Lead Nurse R and D                                   | Birmingham Women's and Children's Hospital and University Hospital Coventry and Warwickshire                                                                               | 2nd Floor, PRI suit, UHCW, Clifford Bridge Road, CV2 2DX                                                         |
| Dr   | Paola Angelini          | Consultant Paediatric Oncology                       | Royal Marsden Hospital                                                                                                                                                     | Downs Road, Sutton, SM2 7HE                                                                                      |
| Dr   | Kate Armon              | Paediatric Rheumatologist                            | Paediatric Department, Addenbrookes hospital, Cambridge                                                                                                                    | Box 267 Children's Services, Biomedical Campus, hills Road, Cambridge Cb2 0QQ                                    |
| Dr   | James Ashton            | Clinical Research Fellow in Paediatric IBD           | Human Genetics and Genomic Medicine, University of Southampton, Department of Paediatric Gastroenterology, Southampton Children's Hospital                                 | Tremona Road, Southampton, SO16 6YD                                                                              |
| Mrs  | Helen Baker             | Data Manager                                         | Paediatric Oncology and Haematology, Cambridge University Hospitals NHS Foundation Trust                                                                                   | Hills Road, Cambridge, CB2 0QQ                                                                                   |
| Mrs  | Nicola Balatoni         | Research Nurse                                       | Leeds Children Hospital                                                                                                                                                    | Leeds Teaching Hospital NHS Trust, Great George Street, LS1 3EX                                                  |
| Dr   | Jed Bamber              | Consultant Paediatrician                             | NHS Dumfries and Galloway                                                                                                                                                  | Dumfries & Galloway Royal Infirmary, Cargenbridge, Dumfries, DG2 8RX                                             |
| Mrs  | Alison Barratt          | Paediatric Clinical Research Nurse                   | Royal United Hospitals Bath NHS Foundation Trust                                                                                                                           | Combe Park, Bath, BA1 3NG                                                                                        |
| Mrs  | Charlene Bass-Woodcock  | Paediatric Rheumatology Clinical Nurse Specialist    | Bradford Teaching Hospitals NHS Foundation Trust                                                                                                                           | Duckworth Lane, Bradford, West Yorkshire, BD9 6RJ                                                                |
| Dr   | Jessica Bate            | Consultant Paediatric Oncology                       | Department of Paediatric Oncology, University Hospital Southampton NHS Foundation Trust                                                                                    | Tremona Road, Southampton, SO16 6YD                                                                              |
| Dr   | Akshay Batra            | Consultant Paediatric Gastroenterologist             | Department of Paediatric Gastroenterology, Southampton Children's Hospital                                                                                                 | Tremona Road, Southampton, SO16 6YD                                                                              |
| Prof | R Mark Beattie          | Consultant Paediatric Gastroenterologist             | Department of Paediatric Gastroenterology, Southampton Children's Hospital                                                                                                 | Tremona Road, Southampton, SO16 6YD                                                                              |
| Dr   | Rumena Begum            | Research Coordinator                                 | Great Ormond Street Hospital for Children NHS Foundation Trust                                                                                                             | Great Ormond Street, London WC1N 3JH                                                                             |
| Miss | Claire Bell             | Paediatric Research Nurse                            | University Hospital Crosshouse                                                                                                                                             | Kilmarnock, KA2 0BE                                                                                              |
| Ms   | Kathryn Bell            | Research Nurse                                       | Great North Children's Hospital                                                                                                                                            | Royal Victoria Infirmary, Newcastle upon Tyne, NE1 4LP                                                           |
| Dr   | Georgina Bird-Lieberman | Paediatric Neurology Consultant                      | University Hospital Southampton NHS Foundation Trust                                                                                                                       | Tremona Road, Southampton, SO16 6YD                                                                              |
| Ms   | Helen Blackburn         | Research and Innovation Manager                      | Royal Manchester Children's Hospital, Manchester University Hospitals NHS Trust,                                                                                           | Royal Manchester Children's Hospital, Manchester University Hospitals NHS Trust, Oxford Rd Manchester M13 9WL UK |
| Dr   | Mary Brennan            | Consultant Paediatric Rheumatologist                 | Royal Hospital for Sick Children, Edinburgh                                                                                                                                | 9 Sciennes Road, Edinburgh, EH1 9LF                                                                              |
| Ms   | Francesca Brewer        | Research sister : Paediatrics and Neonates           | Birmingham Women's and Children's Hospital and University Hospital Coventry and Warwickshire                                                                               | R&D Clinical Trials Office, 3rd Floor, West wing, UHCW, Clifford Bridge, CV2 2DX                                 |
| Mrs  | Marlene Brito           | Clinical Trials Assistant                            | Department of Paediatric Oncology, University Hospital Southampton NHS Foundation Trust and Faculty of Medicine and Institute for Life Sciences, University of Southampton | Tremona Road, Southampton, SO16 6YD                                                                              |
| Dr   | Richard Brough          | Consultant urologist and urological cancer lead      | The Shrewsbury and Telford Hospital NHS Trust                                                                                                                              | Mytton Oak Road, Shrewsbury, Shropshire, SY3 8XQ                                                                 |

|    |      |                      |                                                                  |                                                                                                                                                                                                                                        |                                                                                |
|----|------|----------------------|------------------------------------------------------------------|----------------------------------------------------------------------------------------------------------------------------------------------------------------------------------------------------------------------------------------|--------------------------------------------------------------------------------|
| 1  | Dr   | Susan Byrne          | Paediatric Neurology Consultant                                  | Evelina London Children' Hospital                                                                                                                                                                                                      | Westminster Bridge Road, London, SE1 7EH                                       |
| 2  |      |                      | Consultant General Paediatrics and Paediatric Research           |                                                                                                                                                                                                                                        |                                                                                |
| 3  | Dr   | Katrina Cathie       |                                                                  | University Hospital Southampton NHS Foundation Trust                                                                                                                                                                                   | Tremona Road, Southampton, SO16 6YD                                            |
| 4  | Dr   | John Chapman         | Consultant Paediatrician                                         | James Paget University Hospital                                                                                                                                                                                                        | Lowestoft Rd, Gorleston, NR31 6LA                                              |
| 5  |      |                      | Consultant Paediatric Neurologist                                |                                                                                                                                                                                                                                        |                                                                                |
| 6  | Dr   | Anne-Marie Child     |                                                                  | Leeds Children Hospital                                                                                                                                                                                                                | Leeds Teaching Hospital NHS Trust, Great George Street, LS1 3EX                |
| 7  |      |                      | Consultant Adolescent Rheumatology                               | Centre for Adolescent Rheumatology Versus Arthritis, University College London                                                                                                                                                         |                                                                                |
| 8  | Dr   | Coziana Ciurtin      |                                                                  |                                                                                                                                                                                                                                        | 3rd Floor Central, 250 Euston Road, London, NW1 2PG                            |
| 9  | Dr   | Sheila Clark         | Consultant dermatology                                           | Leeds Children Hospital                                                                                                                                                                                                                | Leeds Teaching Hospital NHS Trust, Great George Street, LS1 3EX                |
| 10 |      |                      | Consultant Paediatric Gastroenterologist                         | Department of Paediatric Gastroenterology, Southampton Children's Hospital                                                                                                                                                             |                                                                                |
| 11 | Dr   | Tracy Coelho         |                                                                  |                                                                                                                                                                                                                                        | Tremona Road, Southampton, SO16 6YD                                            |
| 12 | Dr   | William Coles        | Consultant Paediatric Rheumatologist                             | Birmingham Women's and Children's Hospital and University Hospital Coventry and Warwickshire                                                                                                                                           | Paediatric Rheumatology, Paediatric Department, UHCW, Clifford Bridge, CV2 2DX |
| 13 | Mrs  | Heather Collier      | Research Nurse                                                   | East Lancs NHS Trust                                                                                                                                                                                                                   | Haslingden Road, Blackburn, BB2 3HH                                            |
| 14 |      |                      | Paediatric Respiratory Consultant                                |                                                                                                                                                                                                                                        |                                                                                |
| 15 | Dr   | Gary Connett         |                                                                  | University Hospital Southampton NHS Foundation Trust                                                                                                                                                                                   | Tremona Road, Southampton, SO16 6YD                                            |
| 16 |      |                      | Consultant Paediatric Haematology                                |                                                                                                                                                                                                                                        |                                                                                |
| 17 | Dr   | Philip Connor        |                                                                  | Noah's Ark Children's Hospital For Wales                                                                                                                                                                                               | Rm 1F31 Cardigan House, UHW, Cardiff, CF14 4XW                                 |
| 18 | Dr   | Michael Cosgrove     | Consultant Paediatric Gastroenterologist                         | Morrison Hospital, Swansea Bay University Health Board                                                                                                                                                                                 | Swansea, SA6 6NL                                                               |
| 19 | Ms   | Gillian Coyle        | Clinical Nurse Specialist                                        | Royal Hospital for Sick Children, Edinburgh                                                                                                                                                                                            | 9 Sciennes Road, Edinburgh, EH1 9LF                                            |
| 20 |      |                      | Consultant Rheumatologist                                        |                                                                                                                                                                                                                                        |                                                                                |
| 21 | Dr   | Brian Davidson       |                                                                  | University Hospital Southampton NHS Foundation Trust                                                                                                                                                                                   | Tremona Road, Southampton, SO16 6YD                                            |
| 22 |      |                      | Data Manager                                                     | Department of Neonatal Medicine, University Hospital Southampton NHS Foundation Trust                                                                                                                                                  |                                                                                |
| 23 | Mrs  | Matthew Davies       |                                                                  |                                                                                                                                                                                                                                        |                                                                                |
| 24 | Mrs  | Sharon Davies-Dear   | Clinical Trials Project Manager                                  | R&D, University Hospital Southampton NHS Foundation Trust                                                                                                                                                                              | Tremona Road, Southampton, SO16 6YD                                            |
| 25 |      |                      | Consultant Paediatric Neurologist                                |                                                                                                                                                                                                                                        |                                                                                |
| 26 | Dr   | Christian De Goede   |                                                                  | Department of Child Health, Lancashire Teaching Hospitals NHS Trusts                                                                                                                                                                   | Royal Preston Hospital, Sharoe Green Lane, Preston PR2 9HT                     |
| 27 | Dr   | Hans de Graaf        | Consultant Paediatric Rheumatology                               | NIHR Southampton Clinical Research Facility and Paediatric Medicine, University Hospital Southampton NHS Foundation Trust                                                                                                              | Tremona Road, Southampton, SO16 6YD                                            |
| 28 |      |                      | Consultant Paediatric and Adolescent rheumatology                |                                                                                                                                                                                                                                        |                                                                                |
| 29 | Dr   | Samundeeswari Deepak |                                                                  | Nottingham Children's Hospital, Queen's Medical Centre, Nottingham University Hospitals NHS Trust                                                                                                                                      | Derby Road, Nottingham, NG72UH                                                 |
| 30 |      |                      | CLUSTER Research Coordinator                                     | Infection, Immunity and Inflammation Research & Teaching Department, University College London Great Ormond Street Institute of Child Health                                                                                           |                                                                                |
| 31 | Mr   | Fatjon Dekaj         |                                                                  |                                                                                                                                                                                                                                        | 30 Guilford Street, London, WC1N 1EH                                           |
| 32 |      |                      | Paediatric Research Nurse                                        |                                                                                                                                                                                                                                        |                                                                                |
| 33 | Miss | Sarah Diment         |                                                                  | Salisbury District Hospital                                                                                                                                                                                                            | Salisbury, Wiltshire, SP2 8BJ                                                  |
| 34 |      |                      | Research Fellow                                                  | University of Southampton, Faculty of Medicine, Clinical and Experimental Sciences                                                                                                                                                     |                                                                                |
| 35 | Dr   | Corine Driessens     |                                                                  |                                                                                                                                                                                                                                        | Tremona Road, Southampton, SO16 6YD                                            |
| 36 |      |                      | Consultant in Paediatric Infectious Diseases and Immunology      | Paediatric Infectious Diseases Research Group, St George's, University of London and St George's University Hospitals NHS Foundation Trust                                                                                             |                                                                                |
| 37 | Dr   | Simon B Drysdale     |                                                                  |                                                                                                                                                                                                                                        | Cranmer Terrace, London, SW17 0RE                                              |
| 38 |      |                      | Consultant paediatric Oncology                                   |                                                                                                                                                                                                                                        |                                                                                |
| 39 | Dr   | Martin Elliott       |                                                                  | Leeds Children Hospital                                                                                                                                                                                                                | Leeds Teaching Hospital NHS Trust, Great George Street, LS1 3EX                |
| 40 |      |                      | Consultant Paediatric Infectious Diseases & Immunology, Honorary | Newcastle Hospitals NHS Foundation Trust; Translational and Clinical Research Institute, Newcastle University, and NIHR Newcastle Biomedical Research Centre based at Newcastle upon Tyne Hospitals NHS Trust and Newcastle University |                                                                                |
| 41 | Prof | Marieke Emonts       |                                                                  |                                                                                                                                                                                                                                        | Royal Victoria Hospital, Queen Victoria Road, Newcastle upon Tyne. NE1 4LP     |

|    |      |                                          |                                                                           |                                                                                                                                                                                                                                      |                                                                                                         |
|----|------|------------------------------------------|---------------------------------------------------------------------------|--------------------------------------------------------------------------------------------------------------------------------------------------------------------------------------------------------------------------------------|---------------------------------------------------------------------------------------------------------|
|    |      | Professor Paediatric Infectious Diseases |                                                                           |                                                                                                                                                                                                                                      |                                                                                                         |
| 1  | Dr   | Mich Erlewyn-Lajeunesse                  | Consultant Paediatric Allergy and Immunology                              | University Hospital Southampton NHS Foundation Trust                                                                                                                                                                                 | Tremona Road, Southampton, SO16 6YD                                                                     |
| 2  | Dr   | Hazel Evans                              | Paediatric Respiratory Consultant                                         | University Hospital Southampton NHS Foundation Trust                                                                                                                                                                                 | Tremona Road, Southampton, SO16 6YD                                                                     |
| 3  | Mrs  | Tracey Farnon                            | Paediatric Consultant                                                     | Salisbury District Hospital                                                                                                                                                                                                          | Salisbury, Wiltshire, SP2 8BJ                                                                           |
| 4  | Prof | Saul Faust                               | Professor of Paediatric Immunology and Infectious Diseases                | NIHR Southampton Clinical Research Facility and NIHR Southampton Biomedical Research Centre, University Hospital Southampton NHS Foundation Trust and Faculty of Medicine and Institute for Life Sciences, University of Southampton | Tremona Road, Southampton, SO16 6YD                                                                     |
| 5  | Dr   | Susanna Felsenstein                      | Consultant Paediatric Infectious Diseases                                 | Alder Hey Children's Hospital                                                                                                                                                                                                        | Liverpool, East Prescott Rd L14 5AB                                                                     |
| 6  | Ms   | Lynsey Felton                            | Paediatric Research Nurse                                                 | James Paget University Hospital                                                                                                                                                                                                      | Lowestoft Rd, Gorleston, NR31 6LA                                                                       |
| 7  | Dr   | Matthew Fenton                           | Consultant Paediatric Cardiologist                                        | Great Ormond Street Hospital for Children NHS Foundation Trust                                                                                                                                                                       | Great Ormond Street, London WC1N 3JH                                                                    |
| 8  | Dr   | Katy Fidler                              | Clinical Senior Lecturer in Paediatric Infectious Diseases and Immunology | Academic Dept of Paediatrics, Brighton and Sussex Medical School, University of Sussex                                                                                                                                               | N - S Rd, Falmer, Brighton BN1 9PX                                                                      |
| 9  | Mrs  | Debbie Fisher                            | Trial Coordinator                                                         | Paediatric Oncology and Haematology, Cambridge University Hospitals NHS Foundation Trust                                                                                                                                             | Hills Road, Cambridge, CB2 0QQ                                                                          |
| 10 | Dr   | Peter W Fowlie                           | Consultant Paediatrician                                                  | Ninewells Hospital and Medical School                                                                                                                                                                                                | Dundee, DD1 9SY                                                                                         |
| 11 | Mrs  | Kirsty Galvin                            | Lead Nurse                                                                | Children's Community Nursing Team, Kent community Health Foundation Trust                                                                                                                                                            | Trinity House, 110-12- Upper Pemberton, Kennington, Ashford, Kent, TN25 4AZ                             |
| 12 | Ms   | Emma Gardiner                            | Research Nurse                                                            | University Hospital Lewisham                                                                                                                                                                                                         | Paediatric Offices, Nockold House, University Hospital Lewisham, Lewisham High street, London, SE13 6LH |
| 13 | Dr   | Edward Gaynor                            | Paediatric Gastroenterology Consultant                                    | Great Ormond Street Hospital for Children NHS Foundation Trust                                                                                                                                                                       | Great Ormond Street, London WC1N 3JH                                                                    |
| 14 | Dr   | Diane Gbesemete                          | Clinical Research Fellow                                                  | NIHR Southampton Clinical Research Facility and NIHR Southampton Biomedical Research Centre, University Hospital Southampton NHS Foundation Trust and Faculty of Medicine and Institute for Life Sciences, University of Southampton | Tremona Road, Southampton, SO16 6YD                                                                     |
| 15 | Dr   | Rodney Gilbert                           | Consultant Paediatric Nephrologist                                        | University Hospital Southampton NHS Foundation Trust                                                                                                                                                                                 | Tremona Road, Southampton, SO16 6YD                                                                     |
| 16 | Dr   | Francis J Gilchrist                      | Paediatric Respiratory Consultant                                         | University Hospitals of North Midlands NHS Trust                                                                                                                                                                                     | Staffordshire Children's Hospital at Royal Stoke, Newcastle Road, Stoke on Trent, ST4 6QG               |
| 17 | Mrs  | Clare Gilmour                            | Immunology Clinical Nurse Specialist                                      | St George's University Hospitals NHS Foundation Trust                                                                                                                                                                                | Cranmer Terrace, London, SW17 0RE                                                                       |
| 18 | Ms   | Claire Glemas                            | Research Nurse                                                            | Paediatric Gastroenterology, Cambridge University Hospitals NHS Foundation Trust                                                                                                                                                     | Hills Road, Cambridge, CB2 0QQ                                                                          |
| 19 | Dr   | Emma Grainger-Allen                      | Consultant Paediatric Allergy and Immunology                              | University Hospital Southampton NHS Foundation Trust                                                                                                                                                                                 | Tremona Road, Southampton, SO16 6YD                                                                     |
| 20 | Dr   | Juliet Gray                              | Associate Professor and Consultant in Paediatric Oncology                 | Department of Paediatric Oncology, University Hospital Southampton NHS Foundation Trust and Faculty of Medicine and Institute for Life Sciences, University of Southampton                                                           | Tremona Road, Southampton, SO16 6YD                                                                     |
| 21 | Ms   | Donna Griffiths                          | Paediatric Research Nurse                                                 | James Paget University Hospital                                                                                                                                                                                                      | Lowestoft Rd, Gorleston, NR31 6LA                                                                       |
| 22 | Mrs  | Rowena Guermech                          | Research Nurse                                                            | Paediatric Oncology and Haematology, Cambridge University Hospitals NHS Foundation Trust                                                                                                                                             | Hills Road, Cambridge, CB2 0QQ                                                                          |
| 23 | Mr   | Neil Hall                                | Research Nurse                                                            | Leeds Children Hospital                                                                                                                                                                                                              | Leeds Teaching Hospital NHS Trust, Great George Street, LS1 3EX                                         |

|    |      |                      |                                                               |                                                                                                                                                                            |                                                                                                                  |
|----|------|----------------------|---------------------------------------------------------------|----------------------------------------------------------------------------------------------------------------------------------------------------------------------------|------------------------------------------------------------------------------------------------------------------|
| 1  | Miss | Nicola Hamilton      | Paediatric Rheumatology Link Nurse                            | NHS Forth Valley                                                                                                                                                           | Forth Valley Royal Hospital, Stirling Road, Larbert FK5 4WR                                                      |
| 2  | Mrs  | Joanna Hancock       | Clinical Nurse Specialist                                     | University Hospital Southampton NHS Foundation Trust                                                                                                                       | Tremona Road, Southampton, SO16 6YD                                                                              |
| 3  | Dr   | Mushfequr R Haq      | Consultant Paediatric Nephrologist                            | University Hospital Southampton NHS Foundation Trust                                                                                                                       | Tremona Road, Southampton SO16 6YD                                                                               |
| 4  | Mrs  | Amanda Harris        | PCD & Children's Respiratory Clinical Nurse Specialist        | NIHR Southampton Biomedical Research Centre, University Hospital Southampton NHS Foundation Trust                                                                          |                                                                                                                  |
| 5  | Dr   | Kathryn Harrison     | Consultant Paediatric & Adolescent Rheumatology               | Rheumatology Department, Birmingham Children's Hospital, Birmingham Women's and Children's NHS Foundation Trust                                                            | Steelhouse Lane, Birmingham B4 6NH                                                                               |
| 6  | Ms   | Rebecca Harrop       | Data Manager                                                  | Great North Children's Hospital                                                                                                                                            | Royal Victoria Infirmary, Newcastle upon Tyne, NE1 4LP                                                           |
| 7  | Miss | Sarah Hartfree       | Paediatric Rheumatology Clinical Nurse Specialist             | University Hospital Southampton NHS Foundation Trust                                                                                                                       | Tremona Road, Southampton SO16 6YD                                                                               |
| 8  | Mrs  | Laura Hennelly       | Adolescent Research Nurse                                     | Centre for Adolescent Rheumatology Versus Arthritis, University College London                                                                                             | 3rd Floor Central, 250 Euston Road, London, NW1 2PG                                                              |
| 9  | Dr   | Avni Hindocha        | Paediatric trainee                                            | Royal Manchester Children's Hospital, Manchester University Hospitals NHS Trust,                                                                                           | Royal Manchester Children's Hospital, Manchester University Hospitals NHS Trust, Oxford Rd Manchester M13 9WL UK |
| 10 | Dr   | John Ho              | Consultant Paediatrician                                      | Whipps Cross University Hospital, London                                                                                                                                   | Whipps Cross Road, Leytonstone, London, E11 1NR                                                                  |
| 11 | Mrs  | Ruth Howman          | Clinical Research Sister                                      | Birmingham Children's Hospital, Birmingham Women's and Children's NHS Foundation Trust                                                                                     | Steelhouse Lane, Birmingham B4 6NH                                                                               |
| 12 | Ms   | Camilla Huber        | Research & Development                                        | Birmingham Women's Hospital, Birmingham Women's and Children's NHS Foundation Trust                                                                                        | Mindelsohn Way, Birmingham B15 2TG                                                                               |
| 13 | Dr   | Marjorie Illingworth | Paediatric Neurology Consultant                               | University Hospital Southampton NHS Foundation Trust                                                                                                                       | Tremona Road, Southampton, SO16 6YD                                                                              |
| 14 | Dr   | Winnie Ip            | Honorary Senior Lecturer & Consultant Paediatric Immunologist | Great Ormond Street Hospital for Children NHS Foundation Trust, Molecular and Cellular Immunology, University College London Great Ormond Street Institute of Child Health | Great Ormond Street, London WC1N 3JH, 30 Guilford Street, London, WC1N 1EH                                       |
| 15 | Dr   | Javed Iqbal          | Consultant Paediatrician                                      | East Lancs NHS Trust                                                                                                                                                       | Haslingden Road, Blackburn, BB2 3HH                                                                              |
| 16 | Dr   | Mark J Johnson       | Consultant Neonatologist                                      | Department of Neonatal Medicine, University Hospital Southampton NHS Foundation Trust, NIHR Biomedical Research Centre, University of Southampton                          | Tremona Road, Southampton, SO16 6YD                                                                              |
| 17 | Dr   | Christine E Jones    | Consultant Paediatric Infectious Diseases                     | University Hospital Southampton NHS Foundation Trust                                                                                                                       | Tremona Road, Southampton, SO16 6YD                                                                              |
| 18 | Mr   | James Jones          | Paediatric Research Nurse                                     | The Shrewsbury and Telford Hospital NHS Trust                                                                                                                              | Mytton Oak Road, Shrewsbury, Shropshire, SY3 8XQ                                                                 |
| 19 | Dr   | Jochen Kammermeier   | Consultant Paediatric Gastroenterologist                      | Evelina London Children's Hospital                                                                                                                                         | Westminster Bridge Road London SE1 7EH                                                                           |
| 20 | Dr   | Dagmar Kastner-Cole  | Consultant Paediatrician                                      | Tayside Children's Hospital, Ninewells Hospital and Medical School                                                                                                         | Dundee, DD1 9SY                                                                                                  |
| 21 | Dr   | Akhila Kavirayani    | Consultant Paediatric Rheumatology                            | Oxford University Hospitals NHS Foundation Trust                                                                                                                           | Nuffield Orthopaedic Centre, Oxford, OX3 7HE                                                                     |
| 22 | Prof | Deirdre Kelly        | Consultant Paediatric Hepatologist                            | Liver Unit, Birmingham Women's & Children's NHS Foundation Trust, University of Birmingham                                                                                 | Steelhouse Lane, Birmingham B4 6NH, Edgbaston, Birmingham B15 2TT                                                |
| 23 | Ms   | Imogen Kelly         | Clinical Nurse Specialist                                     | Royal Hospital for Sick Children, Edinburgh                                                                                                                                | 9 Sciennes Road, Edinburgh, EH1 9LF                                                                              |
| 24 | Dr   | Ciara Kennedy        | Clinical Trials Coordinator                                   | Great North Children's Hospital                                                                                                                                            | Royal Victoria Infirmary, Newcastle upon Tyne, NE1 4LP                                                           |
| 25 | Dr   | Larissa Kerecuk      | Clinical Research Specialty Lead Paediatrics, NIHR CRN        | Birmingham Children's Hospital, Birmingham Women's and Children's NHS Foundation Trust                                                                                     | Steelhouse Lane, Birmingham B4 6NH                                                                               |

|      |                  |                                                                               |                                                                                                                                                                                                                                                                                                                           |                                                                                                                     |
|------|------------------|-------------------------------------------------------------------------------|---------------------------------------------------------------------------------------------------------------------------------------------------------------------------------------------------------------------------------------------------------------------------------------------------------------------------|---------------------------------------------------------------------------------------------------------------------|
|      |                  | West Midlands,<br>Consultant Paediatric<br>Nephrologist                       |                                                                                                                                                                                                                                                                                                                           |                                                                                                                     |
| Mr   | Charles Keys     | Consultant Paediatric<br>Surgery                                              | University Hospital Southampton NHS Foundation Trust                                                                                                                                                                                                                                                                      | Tremona Road, Southampton, SO16 6YD                                                                                 |
| Miss | Aline Kimonyo    | Research Coordinator                                                          | University College London Great Ormond Street Institute of Child<br>Health                                                                                                                                                                                                                                                | UCL Great Ormond Street Institute of Child Health 30 Guilford Street<br>London WC1N 1EH                             |
| Mrs  | Sharon King      | Research Nurse                                                                | Great North Children's Hospital                                                                                                                                                                                                                                                                                           | Royal Victoria Infirmary, Newcastle upon Tyne, NE1 4LP                                                              |
| Mrs  | Vicky King       | Clinical Trials<br>Practitioner                                               | Salisbury District Hospital                                                                                                                                                                                                                                                                                               | Salisbury, Wiltshire, SP2 8BJ                                                                                       |
| Dr   | Fenella Kirkham  | Paediatric Neurology<br>Consultant                                            | University Hospital Southampton NHS Foundation Trust                                                                                                                                                                                                                                                                      | Tremona Road, Southampton, SO16 6YD                                                                                 |
| Dr   | Alice Leahy      | Consultant Paediatric<br>Rheumatologist                                       | University Hospital Southampton NHS Foundation Trust                                                                                                                                                                                                                                                                      | Tremona Road, Southampton SO16 6YD                                                                                  |
| Ms   | Gemma Lee        | Clinical Nurse Specialist<br>– Paediatric IBD                                 | Evelina London Children's Hospital                                                                                                                                                                                                                                                                                        | Westminster Bridge Road London SE1 7EH                                                                              |
| Dr   | Julian Legg      | Paediatric Respiratory<br>Consultant                                          | University Hospital Southampton NHS Foundation Trust                                                                                                                                                                                                                                                                      | Tremona Road, Southampton, SO16 6YD                                                                                 |
| Dr   | Valentina Leone  | Consultant Paediatric<br>Rheumatology                                         | Leeds Children Hospital                                                                                                                                                                                                                                                                                                   | Leeds Teaching Hospital NHS Trust, Great George Street, LS1 3EX                                                     |
| Dr   | Derek Lim        | Consultant Clinical<br>Geneticist                                             | Clinical Genetics Department, West Midlands Regional Genetics<br>Service, Birmingham Women's and Children's Hospital NHS<br>Foundation Trust                                                                                                                                                                              | Mindelsohn Way, Birmingham B15 2TG                                                                                  |
| Mrs  | Adine Logan      | Research Nurse                                                                | East Lancs NHS Trust                                                                                                                                                                                                                                                                                                      | Haslingden Road, Blackburn, BB2 3HH                                                                                 |
| Prof | Jane Lucas       | Professor of Paediatric<br>Respiratory Medicine                               | PCD Centre, School of Clinical and Experimental Sciences, Faculty of<br>Medicine and Institute for Life Sciences, University of Southampton,<br>NIHR Southampton Biomedical Research Centre, University Hospital<br>Southampton NHS Foundation Trust;                                                                     | Tremona Road, Southampton SO16 6YD                                                                                  |
| Dr   | David Lynn       | Consultant Paediatrician                                                      | NHS Forth Valley                                                                                                                                                                                                                                                                                                          | Forth Valley Royal Hospital, Stirling Road, Larbert FK5 4WR                                                         |
| Mrs  | Susan Macfarlane | Paediatric Research<br>Nurse                                                  | Scottish Paediatric Research Network, Ninewells Hospital and Medical<br>School                                                                                                                                                                                                                                            | Dundee, DD1 9SY                                                                                                     |
| Ms   | Lydia Makusha    | Neurology Specialist<br>Nurse                                                 | Neurology Specialist Nurse, Neurology Department, Birmingham<br>Children's Hospital, Birmingham Women's and Children's NHS<br>Foundation Trust                                                                                                                                                                            | Steelhouse Lane, Birmingham B4 6NH                                                                                  |
| Dr   | Gulshan A Malik  | Consultant Paediatrician                                                      | Royal Aberdeen Children hospital                                                                                                                                                                                                                                                                                          | Westburn road, Aberdeen Scotland, AB25 2ZG                                                                          |
| Dr   | Stephen D Marks  | Reader and Consultant<br>in Paediatric Nephrology                             | NIHR Great Ormond Street Hospital Biomedical Research Centre,<br>University College London Great Ormond Street Institute of Child<br>Health                                                                                                                                                                               | 30 Guilford Street, London WC1N 1EH                                                                                 |
| Dr   | Verghese Mathew  | Consultant Paediatrician                                                      | Hull University Teaching Hospitals NHS Trust                                                                                                                                                                                                                                                                              | Anlaby Road, Hull, HU3 2JZ                                                                                          |
| Dr   | Janet E McDonagh | Senior Lecturer in<br>Paediatric and<br>Adolescent<br>Rheumatology            | Versus Arthritis Centre for Epidemiology; Centre for MSK Research,<br>University of Manchester; NIHR Biomedical Research Centre,<br>Manchester University Hospital NHS Trust; Department of Paediatric<br>and Adolescent Rheumatology, Royal Manchester Children's Hospital,<br>Manchester University Hospitals NHS Trust | Centre for MSK Research, Stopford Building, University of Manchester<br>Oxford Rd Manchester M13 9PT                |
| Dr   | Flora McErlane   | Consultant Paediatric<br>Rheumatologist and<br>Associate Clinical<br>Lecturer | Newcastle Hospitals NHS Foundation Trust and Institute of Health and<br>Society, Newcastle University                                                                                                                                                                                                                     | Royal Victoria Hospital, Queen Victoria Road, Newcastle upon Tyne. NE1<br>4LP                                       |
| Mrs  | Ann McGovern     | Senior Clinical Research<br>Practitioner in<br>Rheumatology                   | Royal Manchester Children's Hospital, Manchester University Hospitals<br>NHS Trust,                                                                                                                                                                                                                                       | Royal Manchester Children's Hospital, Manchester University Hospitals<br>NHS Trust, Oxford Rd Manchester M13 9WL UK |



|    |      |                      |                                                          |                                                                                                                                                                                                                                      |                                                                                                         |
|----|------|----------------------|----------------------------------------------------------|--------------------------------------------------------------------------------------------------------------------------------------------------------------------------------------------------------------------------------------|---------------------------------------------------------------------------------------------------------|
| 1  | Ms   | Karen McIntyre       | Paediatric Specialist Nurse                              | Ninewells Hospital and Medical School                                                                                                                                                                                                | Dundee, DD1 9SY                                                                                         |
| 2  | Dr   | Ross McLean          | Specialty Doctor in Paediatrics                          | NHS Lanarkshire                                                                                                                                                                                                                      | Kirklands, Fallside Road. Bothwell, G71 8BB                                                             |
| 3  | Dr   | Paddy McMaster       | Consultant in Paediatric Infectious Diseases             | North Manchester General Hospital                                                                                                                                                                                                    | Delauneys Road, Manchester, M8 5RB                                                                      |
| 4  | Dr   | Nabil Melhem         | Consultant Paediatric Nephrologist                       | Department of Paediatric Nephrology, Evelina London Children's Hospital, Guy's & St. Thomas' Foundation Hospitals NHS Trust                                                                                                          | Westminster Bridge Road, London, SE1 7EH, UK                                                            |
| 5  | Ms   | Dawn Metcalfe        | Clinical Trials Associate                                | Great North Children's Hospital                                                                                                                                                                                                      | Royal Victoria Infirmary, Newcastle upon Tyne, NE1 4LP                                                  |
| 6  | Ms   | Danielle Miller      | Children's Research Nurse                                | Oxford University Hospitals NHS Foundation Trust                                                                                                                                                                                     | John Radcliff hospital, WWLG1 room 10.15, Oxford, OX3 9DU                                               |
| 7  | Ms   | Lynne Mills          | Information Analyst Advanced                             | NIHR Southampton Clinical Research Facility, University Hospital Southampton NHS Foundation Trust                                                                                                                                    | Tremona Road, Southampton, SO16 6YD                                                                     |
| 8  | Ms   | Lisa Moyes           | Paediatric Research Practitioner                         | Nottingham Children's Hospital, Queen's Medical Centre, Nottingham University Hospitals NHS Trust                                                                                                                                    | Derby Road, Nottingham, NG72UH                                                                          |
| 9  | Dr   | Alasdair Munro       | Clinical Research Fellow                                 | NIHR Southampton Clinical Research Facility and NIHR Southampton Biomedical Research Centre, University Hospital Southampton NHS Foundation Trust and Faculty of Medicine and Institute for Life Sciences, University of Southampton | Tremona Road, Southampton, SO16 6YD                                                                     |
| 10 | Miss | Olivia Murphy-Parry  | Paediatric Rheumatology Clinical Nurse Specialist        | University Hospital Southampton NHS Foundation Trust                                                                                                                                                                                 | Tremona Road, Southampton SO16 6YD                                                                      |
| 11 | Dr   | Mohamed Mutalib      | Consultant paediatric gastroenterologist                 | Evelina London Children' Hospital                                                                                                                                                                                                    | Westminster Bridge Road, London< SE1 7EH                                                                |
| 12 | Dr   | Arvind Nagra         | Consultant Paediatric Nephrologist                       | University Hospital Southampton NHS Foundation Trust                                                                                                                                                                                 | Tremona Road, Southampton SO16 6YD                                                                      |
| 13 | Dr   | Sarveshni Naidoo     | Consultant General Paediatrics                           | NHS Lanarkshire                                                                                                                                                                                                                      | Kirklands, Fallside Road. Bothwell, G71 8BB                                                             |
| 14 | Dr   | Gary Nicolin         | Consultant Paediatric Oncology                           | University Hospital Southampton NHS Foundation Trust                                                                                                                                                                                 | Tremona Road, Southampton, SO16 6YD                                                                     |
| 15 | Dr   | Maggie Nyirenda      | Consultant Paediatrician                                 | University Hospital Lewisham                                                                                                                                                                                                         | Paediatric Offices, Nockold House, University Hospital Lewisham, Lewisham High street, London, SE13 6LH |
| 16 | Mrs  | Grainne O'Connor     | Senior Paediatric Research Nurse                         | North Manchester General Hospital                                                                                                                                                                                                    | Delauneys Road, Manchester, M8 5RB                                                                      |
| 17 | Dr   | Sian O'Riordan       | Consultant Paediatric Immunology and Infectious Diseases | Leeds Children Hospital                                                                                                                                                                                                              | Leeds Teaching Hospital NHS Trust, Great George Street, LS1 3EX                                         |
| 18 | Dr   | Briget Oates         | Paediatric Consultant                                    | University Hospital Crosshouse                                                                                                                                                                                                       | Kilmarnock, KA2 0BE                                                                                     |
| 19 | Dr   | Daniel Owens         | Clinical Research Fellow                                 | NIHR Southampton Clinical Research Facility and NIHR Southampton Biomedical Research Centre, University Hospital Southampton NHS Foundation Trust and Faculty of Medicine and Institute for Life Sciences, University of Southampton | Tremona Road, Southampton, SO16 6YD                                                                     |
| 20 | Ms   | Krishna Panchal      | Clinical Trials Support Officer                          | Research Department, Lancashire Teaching Hospitals NHS Trusts                                                                                                                                                                        | Royal Preston Hospital, Sharoe Green Lane, Preston PR2 9HT                                              |
| 21 | Ms   | Sharon Parkes        | Nephrology and Rare Disease Research Coordinator         | Nephrology and Rare Disease Research Coordinator, R&D Department , Birmingham Women's and Children's NHS Foundation Trust                                                                                                            | Steelhouse Lane, Birmingham B4 6NH                                                                      |
| 22 | Mrs  | Charlotte Passingham | Research Co-ordinator                                    | Liver Unit, Birmingham Children's Hospital, Birmingham Women's and Children's NHS Foundation Trust                                                                                                                                   | Steelhouse Lane, Birmingham B4 6NH                                                                      |
| 23 | Mr   | Ravin Patel          | Medical Student                                          | University of Southampton                                                                                                                                                                                                            | University Rd, Southampton SO17 1BJ                                                                     |
| 24 | Dr   | Sanjay Patel         | Consultant Paediatric Infectious Diseases                | University Hospital Southampton NHS Foundation Trust                                                                                                                                                                                 | Tremona Road, Southampton, SO16 6YD                                                                     |

|    |      |                       |                                                        |                                                                                                                             |                                                                                                                  |
|----|------|-----------------------|--------------------------------------------------------|-----------------------------------------------------------------------------------------------------------------------------|------------------------------------------------------------------------------------------------------------------|
| 1  | Dr   | Margaret Peebles      | Consultant Paediatrician                               | Ninewells Hospital and Medical School                                                                                       | Dundee, DD1 9SY                                                                                                  |
| 2  | Dr   | Salina Persand        | Clinical Research Practitioner                         | Imperial College Healthcare NHS Trust and Imperial College London. Children's Clinical Research Facility                    |                                                                                                                  |
| 3  |      |                       | Paediatric Infectious Diseases Nurse Specialist        |                                                                                                                             |                                                                                                                  |
| 4  | Mrs  | Sharon Peters         |                                                        | North Manchester General Hospital                                                                                           | Delaunays Road, Manchester, M8 5RB                                                                               |
| 5  | Mrs  | Charlotte Phillips    | Team leader                                            | Childrens community Nursing Team, Kent community Health Foundation Trust                                                    | Trinity House, 110-12- Upper Pemberton, Kennington, Ashford, Kent, TN25 4AZ                                      |
| 6  | Mrs  | Helen Pidgeon         | Clinical Trials Assistant                              | Salisbury District Hospital                                                                                                 | Salisbury, Wiltshire, SP2 8BJ                                                                                    |
| 7  | Mrs  | Sue Power             | Paediatric Research Nurse                              | Poole Hospital NHS Foundation Trust                                                                                         | Longfleet Rd, Poole, BH15 2JB                                                                                    |
| 8  |      |                       | Consultant Paediatric Nephrologist                     |                                                                                                                             |                                                                                                                  |
| 9  | Dr   | Evgenia Preka         |                                                        | University Hospital Southampton NHS Foundation Trust                                                                        | Tremona Road, Southampton SO16 6YD                                                                               |
| 10 | Ms   | Vanessa Raimondo      | Clinical Nurse Specialist                              | Royal Hospital for Sick Children, Edinburgh                                                                                 | 9 Sciennes Road, Edinburgh, EH1 9LF                                                                              |
| 11 | Dr   | Jagadeesh Ramachandra | Consultant Paediatrician                               | Royal United Hospitals Bath NHS Foundation Trust                                                                            | Combe Park, Bath, BA1 3NG                                                                                        |
| 12 | Dr   | Ramya Ramanujachar    | Consultant Paediatric Oncology                         | University Hospital Southampton NHS Foundation Trust                                                                        | Tremona Road, Southampton, SO16 6YD                                                                              |
| 13 |      |                       | Clinical Nurse Specialist Nephrology                   | Department of Paediatric Nephrology, Evelina London Children's Hospital, Guy's & St. Thomas' Foundation Hospitals NHS Trust | Westminster Bridge Road, London, SE1 7EH, UK                                                                     |
| 14 | Miss | Pernille Rasmussen    |                                                        |                                                                                                                             |                                                                                                                  |
| 15 | Dr   | Trevor Richens        | Consultant Paediatric Cardiologist                     | University Hospital Southampton NHS Foundation Trust                                                                        | Tremona Road, Southampton, SO16 6YD                                                                              |
| 16 | Dr   | Valerie Rogers        | Consultant Paediatric Rheumatologist                   | University Hospital Bristol NHS Foundation trust                                                                            | Marlborough Street, Bristol, BS1 3NU                                                                             |
| 17 | Dr   | Erika Rojas-Jimenz    | Paediatric Research Clinical Fellow                    | Poole Hospital NHS Foundation Trust                                                                                         | Longfleet Rd, Poole, BH15 2JB                                                                                    |
| 18 | Dr   | Kevin Roman           | Consultant Paediatric Cardiologist                     | University Hospital Southampton NHS Foundation Trust                                                                        | Tremona Road, Southampton, SO16 6YD                                                                              |
| 19 | Ms   | Chloe Saad            | Clinical Research Assistant                            | University Hospital Lewisham                                                                                                | Paediatric Offices, Nockold House, University Hospital Lewisham, Lewisham High street, London, SE13 6LH          |
| 20 | Mr   | Stephen Saich         | CRF Clinical Research Project Manager                  | NIHR Southampton Clinical Research Facility, University Hospital Southampton NHS Foundation Trust                           | Tremona Road, Southampton, SO16 6YD                                                                              |
| 21 | Ms   | Rebecca Sarjeant      | Research Nurse                                         | Great North Children's Hospital                                                                                             | Royal Victoria Infirmary, Newcastle upon Tyne, NE1 4LP                                                           |
| 22 | Ms   | Paula Saunderson      | Clinical Trials Co-ordinator                           | Alder Hey Children's NHS Foundation Trust                                                                                   | Eaton Road, West Derby, Liverpool, L12 2AP                                                                       |
| 23 |      |                       | Clinical Nurse Specialist, Paediatric Gastroenterology |                                                                                                                             |                                                                                                                  |
| 24 | Miss | Francesca Schiavone   |                                                        | Morrison Hospital, Swansea Bay University Health Board                                                                      | Swansea, SA6 6NL                                                                                                 |
| 25 | Ms   | Beatrice Selby        | Clinical research coordinator                          | NIHR Southampton Clinical Research Facility, University Hospital Southampton NHS Foundation Trust                           | Tremona Road, Southampton SO16 6YD                                                                               |
| 26 | Dr   | Fiona Shackley        | Consultant Paediatric Infectious Diseases              | Sheffield Children's Hospital                                                                                               | Clarkson St, Broomhall, Sheffield S10 2TH                                                                        |
| 27 | Ms   | Jennifer Sharp        | Research Nurse                                         | Paediatric Research , Cambridge University Hospitals NHS Foundation Trust                                                   | Hills Road, Cambridge, CB2 0QQ                                                                                   |
| 28 | Dr   | Meera Shaunak         | Clinical Research Fellow                               | NIHR Southampton Clinical Research Facility, University Hospital Southampton NHS Foundation Trust                           | Tremona Road, Southampton, SO16 6YD                                                                              |
| 29 | Dr   | Mohan Shenoy          | consultant Paediatric nephrologist                     | Royal Manchester Children's Hospital, Manchester University Hospitals NHS Trust,                                            | Royal Manchester Children's Hospital, Manchester University Hospitals NHS Trust, Oxford Rd Manchester M13 9WL UK |
| 30 | Dr   | Vinay Shivamurthy     | Consultant Paediatric Rheumatology                     | Evelina London Children's Hospital                                                                                          | Westminster Bridge Road London SE1 7EH                                                                           |
| 31 | Ms   | Theresa Simangan      | Senior Paediatric Research Nurse                       | Whipps Cross University Hospital, London                                                                                    | Whipps Cross Road, Leytonstone, London, E11 1NR                                                                  |

|    |      |                     |                                                   |                                                                                                                                                                                                                                                                                                                                                                                                            |                                                                                           |
|----|------|---------------------|---------------------------------------------------|------------------------------------------------------------------------------------------------------------------------------------------------------------------------------------------------------------------------------------------------------------------------------------------------------------------------------------------------------------------------------------------------------------|-------------------------------------------------------------------------------------------|
| 1  | Dr   | Jaspal Singh        | Paediatric Neurology Consultant                   | University Hospital Southampton NHS Foundation Trust                                                                                                                                                                                                                                                                                                                                                       | Tremona Road, Southampton, SO16 6YD                                                       |
| 2  |      |                     |                                                   |                                                                                                                                                                                                                                                                                                                                                                                                            |                                                                                           |
| 3  | Mrs  | Samantha Small      | Paediatric Rheumatology Clinical Nurse Specialist | University Hospital Southampton NHS Foundation Trust                                                                                                                                                                                                                                                                                                                                                       | Tremona Road, Southampton SO16 6YD                                                        |
| 4  |      |                     |                                                   |                                                                                                                                                                                                                                                                                                                                                                                                            |                                                                                           |
| 5  | Dr   | Ameenat Lola Solebo | Consultant Paediatric Ophthalmology               | Great Ormond Street Hospital for Children NHS Foundation Trust, Population, Policy & Practice Research & Teaching Department, University College London Great Ormond Street Institute of Child Health                                                                                                                                                                                                      | Great Ormond Street, London WC1N 3JH, 30 Guilford Street, London WC1N 1EH                 |
| 6  |      |                     |                                                   |                                                                                                                                                                                                                                                                                                                                                                                                            |                                                                                           |
| 7  | Dr   | Helen Spencer       | Consultant in Transplant and Respiratory Medicine | Great Ormond Street Hospital for Children NHS Foundation Trust                                                                                                                                                                                                                                                                                                                                             | Great Ormond Street, London WC1N 3JH                                                      |
| 8  |      |                     |                                                   |                                                                                                                                                                                                                                                                                                                                                                                                            |                                                                                           |
| 9  | Dr   | Isaac Staff         | Foundation Doctor                                 | James Paget University Hospital                                                                                                                                                                                                                                                                                                                                                                            | Lowestoft Rd, Gorleston, NR31 6LA                                                         |
| 10 | Dr   | Karnam Sugumar      | Consultant Paediatrician                          | Department of Child Health, Lancashire Teaching Hospitals NHS Trusts                                                                                                                                                                                                                                                                                                                                       | Royal Preston Hospital, Sharoe Green Lane, Preston PR2 9HT                                |
| 11 |      |                     |                                                   |                                                                                                                                                                                                                                                                                                                                                                                                            |                                                                                           |
| 12 | Ms   | Zoe Swash           | Clinical research coordinator                     | NIHR Southampton Clinical Research Facility, University Hospital Southampton NHS Foundation Trust                                                                                                                                                                                                                                                                                                          | Tremona Road, Southampton, SO16 6YD                                                       |
| 13 | Dr   | Sneha Tandon        | Consultant Paediatric Haematologist               | University Hospital Southampton NHS Foundation Trust                                                                                                                                                                                                                                                                                                                                                       | Tremona Road, Southampton SO16 6YD                                                        |
| 14 |      |                     |                                                   |                                                                                                                                                                                                                                                                                                                                                                                                            |                                                                                           |
| 15 | Dr   | Marc Tebruegge      | Consultant in infectious diseases and immunology  | Evelina London Children's Hospital                                                                                                                                                                                                                                                                                                                                                                         | Westminster Bridge Road London SE1 7EH                                                    |
| 16 |      |                     |                                                   |                                                                                                                                                                                                                                                                                                                                                                                                            |                                                                                           |
| 17 | Ms   | Evelyn Thomson      | Research Nurse                                    | Great North Children's Hospital                                                                                                                                                                                                                                                                                                                                                                            | Royal Victoria Infirmary, Newcastle upon Tyne, NE1 4LP                                    |
| 18 | Dr   | Mark Tighe          | Consultant Paediatrician                          | Poole Hospital NHS Foundation Trust                                                                                                                                                                                                                                                                                                                                                                        | Longfleet Rd, Poole, BH15 2JB                                                             |
| 19 |      |                     |                                                   |                                                                                                                                                                                                                                                                                                                                                                                                            |                                                                                           |
| 20 | Mrs  | Joanne Tomlinson    | Research Nurse                                    | University Hospitals of North Midlands NHS Trust                                                                                                                                                                                                                                                                                                                                                           | Staffordshire Children's Hospital at Royal Stoke, Newcastle Road, Stoke on Trent, ST4 6QG |
| 21 | Dr   | Nicola Trevelyan    | Consultant Paediatric Diabetologist               | University Hospital Southampton NHS Foundation Trust                                                                                                                                                                                                                                                                                                                                                       | Tremona Road, Southampton, SO16 6YD                                                       |
| 22 | Dr   | Brigitte Vollmer    | Paediatric Neurology Consultant                   | University Hospital Southampton NHS Foundation Trust                                                                                                                                                                                                                                                                                                                                                       | Tremona Road, Southampton, SO16 6YD                                                       |
| 23 |      |                     |                                                   |                                                                                                                                                                                                                                                                                                                                                                                                            |                                                                                           |
| 24 | Dr   | Woolf Walker        | Paediatric Respiratory Consultant                 | PCD Centre, University Hospital Southampton NHS Foundation Trust, School of Clinical and Experimental Sciences, Faculty of Medicine and Institute for Life Sciences, University of Southampton, NIHR Southampton Biomedical Research Centre, University Hospital Southampton NHS Foundation Trust                                                                                                          | Tremona Road, Southampton SO16 6YD                                                        |
| 25 | Dr   | Jo Walsh            | Consultant Paediatric Rheumatology                | Royal Hospital for Children Glasgow                                                                                                                                                                                                                                                                                                                                                                        | 345 Govan Rd, Glasgow G51 4TF                                                             |
| 26 |      |                     |                                                   |                                                                                                                                                                                                                                                                                                                                                                                                            |                                                                                           |
| 27 | Ms   | Rachel Wane         | Lead Research Nurse – Children's Team             | Bradford Teaching Hospitals NHS Foundation Trust                                                                                                                                                                                                                                                                                                                                                           | Duckworth Lane, Bradford, West Yorkshire, BD9 6RJ                                         |
| 28 | Dr   | Evangeline Wassmer  | Paediatric Neurology Consultant                   | Neurology Dept, Birmingham Children's Hospital, Birmingham Women's and Children's NHS Foundation Trust                                                                                                                                                                                                                                                                                                     | Steelhouse Lane, Birmingham B4 6NH                                                        |
| 29 | Mrs  | Elizabeth Waxman    | Paediatric Research Nurse Manager                 | Glasgow Clinical Research Facility                                                                                                                                                                                                                                                                                                                                                                         | 345 Govan Rd, Glasgow G51 4TF                                                             |
| 30 |      |                     |                                                   |                                                                                                                                                                                                                                                                                                                                                                                                            |                                                                                           |
| 31 | Prof | Lucy R Wedderburn   | Consultant Paediatric Rheumatology                | Infection, Immunity and Inflammation Research & Teaching Department, University College London Great Ormond Street Institute of Child Health, Paediatric Rheumatology, Great Ormond Street Hospital NHS Foundation Trust, NIHR Great Ormond Street Hospital Biomedical Research Centre, Arthritis Research UK Centre for Adolescent Rheumatology, GOS Institute of Child Health, University College London | 30 Guilford Street, London, WC1N 1EH, Great Ormond Street, London WC1N 3JH                |
| 32 |      |                     |                                                   |                                                                                                                                                                                                                                                                                                                                                                                                            |                                                                                           |
| 33 | Mrs  | Lucy Wellings       | Paediatric and Adolescent Research Nurse          | University College London NHS Foundation Trust                                                                                                                                                                                                                                                                                                                                                             | 3rd Floor Central, 250 Euston Road, London, NW1 2PG                                       |
| 34 |      |                     |                                                   |                                                                                                                                                                                                                                                                                                                                                                                                            |                                                                                           |
| 35 |      |                     |                                                   |                                                                                                                                                                                                                                                                                                                                                                                                            |                                                                                           |
| 36 |      |                     |                                                   |                                                                                                                                                                                                                                                                                                                                                                                                            |                                                                                           |
| 37 |      |                     |                                                   |                                                                                                                                                                                                                                                                                                                                                                                                            |                                                                                           |
| 38 |      |                     |                                                   |                                                                                                                                                                                                                                                                                                                                                                                                            |                                                                                           |
| 39 |      |                     |                                                   |                                                                                                                                                                                                                                                                                                                                                                                                            |                                                                                           |
| 40 |      |                     |                                                   |                                                                                                                                                                                                                                                                                                                                                                                                            |                                                                                           |
| 41 |      |                     |                                                   |                                                                                                                                                                                                                                                                                                                                                                                                            |                                                                                           |
| 42 |      |                     |                                                   |                                                                                                                                                                                                                                                                                                                                                                                                            |                                                                                           |
| 43 |      |                     |                                                   |                                                                                                                                                                                                                                                                                                                                                                                                            |                                                                                           |
| 44 |      |                     |                                                   |                                                                                                                                                                                                                                                                                                                                                                                                            |                                                                                           |
| 45 |      |                     |                                                   |                                                                                                                                                                                                                                                                                                                                                                                                            |                                                                                           |
| 46 |      |                     |                                                   |                                                                                                                                                                                                                                                                                                                                                                                                            |                                                                                           |

|    |     |                     |                                              |                                                                                                          |                                                                 |
|----|-----|---------------------|----------------------------------------------|----------------------------------------------------------------------------------------------------------|-----------------------------------------------------------------|
| 1  | Dr  | Andrea Whitney      | Paediatric Neurology Consultant              | University Hospital Southampton NHS Foundation Trust                                                     | Tremona Road, Southampton, SO16 6YD                             |
| 2  | Dr  | Elizabeth Whittaker | Consultant Paediatric Infectious Diseases    | Imperial College Healthcare NHS Trust and Imperial College London. Children's Clinical Research Facility | 2nd Floor Cambridge Wing, Norfolk Place, London W2 1NY          |
| 3  | Mrs | Rachel Wiffen       | Paediatric Research Practitioner             | Nottingham Children's Hospital, Queen's Medical Centre, Nottingham University Hospitals NHS Trust        | Derby Road, Nottingham, NG72UH                                  |
| 4  | Mr  | Matthew Wilkins     | Clinical research coordinator                | NIHR Southampton Clinical Research Facility, University Hospital Southampton NHS Foundation Trust        | Tremona Road, Southampton SO16 6YD                              |
| 5  | Ms  | Jessica Williams    | Data Manager                                 | Great North Children's Hospital                                                                          | Royal Victoria Infirmary, Newcastle upon Tyne, NE1 4LP          |
| 6  | Dr  | Mark Wood           | Consultant Paediatric Rheumatology           | Leeds Children Hospital                                                                                  | Leeds Teaching Hospital NHS Trust, Great George Street, LS1 3EX |
| 7  | Mrs | Sophie Wool         | Research Nurse                               | Paediatric Oncology and Haematology, Cambridge University Hospitals NHS Foundation Trust                 | Hills Road, Cambridge, CB2 0QQ                                  |
| 8  | Ms  | Suzannah Wright     | Project Manager                              | Paediatric Infectious Diseases Research Group, St George's, University of London                         | Cranmer Terrace, London, SW17 0RE                               |
| 9  | Mrs | Wing Han Wu         | Clinical Research Coordinator                | Centre for Adolescent Rheumatology Versus Arthritis, University College London                           | 3rd Floor Central, 250 Euston Road, London, NW1 2PG             |
| 10 | Ms  | Caroline Youle      | Respiratory Nurse Specialist/ Research Nurse | Nottingham Children's Hospital, Queen's Medical Centre, Nottingham University Hospitals NHS Trust        | Derby Road, Nottingham, NG72UH                                  |

## Appendix B: Weekly Questionnaire

| In the week beginning xx/xx/xxxx have you experienced any of the following symptoms? |                                                                                                                                                |                                                                                                                                                                                                                                                           |
|--------------------------------------------------------------------------------------|------------------------------------------------------------------------------------------------------------------------------------------------|-----------------------------------------------------------------------------------------------------------------------------------------------------------------------------------------------------------------------------------------------------------|
| 1.1                                                                                  | I have had no symptoms                                                                                                                         | <input type="radio"/> I have had no symptoms<br><input type="radio"/> I have had symptoms                                                                                                                                                                 |
| 1.2                                                                                  | Measured temperature above 38 °C                                                                                                               | <input type="radio"/> Yes<br><input type="radio"/> No                                                                                                                                                                                                     |
| 1.2.1                                                                                | <b>If 'Measured temperature above 38 °C' is equal to 'Yes' answer this question:</b><br>Which days did you measure a temperature above 38 °C?  | <input type="checkbox"/> Monday<br><input type="checkbox"/> Tuesday<br><input type="checkbox"/> Wednesday<br><input type="checkbox"/> Thursday<br><input type="checkbox"/> Friday<br><input type="checkbox"/> Saturday<br><input type="checkbox"/> Sunday |
| 1.2.2                                                                                | <b>If 'Measured temperature above 38 °C' is equal to 'Yes' answer this question:</b><br>Have you experienced a worsening of the above symptom? | <input type="radio"/> Yes<br><input type="radio"/> No                                                                                                                                                                                                     |
| 1.3                                                                                  | Cough                                                                                                                                          | <input type="radio"/> Yes<br><input type="radio"/> No                                                                                                                                                                                                     |
| 1.3.1                                                                                | <b>If 'Cough' is equal to 'Yes' answer this question:</b><br>Which days did you experience a cough?                                            | <input type="checkbox"/> Monday<br><input type="checkbox"/> Tuesday<br><input type="checkbox"/> Wednesday<br><input type="checkbox"/> Thursday<br><input type="checkbox"/> Friday<br><input type="checkbox"/> Saturday<br><input type="checkbox"/> Sunday |
| 1.3.2                                                                                | <b>If 'Cough' is equal to 'Yes' answer this question:</b><br>Have you experienced a worsening of the above symptom?                            | <input type="radio"/> Yes<br><input type="radio"/> No                                                                                                                                                                                                     |
| 1.4                                                                                  | Shortness of breath                                                                                                                            | <input type="radio"/> Yes<br><input type="radio"/> No                                                                                                                                                                                                     |
| 1.4.1                                                                                | <b>If 'Shortness of breath' is equal to 'Yes' answer this question:</b><br>Which days did you experience shortness of breath?                  | <input type="checkbox"/> Monday<br><input type="checkbox"/> Tuesday<br><input type="checkbox"/> Wednesday<br><input type="checkbox"/> Thursday<br><input type="checkbox"/> Friday<br><input type="checkbox"/> Saturday                                    |

|       |                                                                                                                                   |                                                                                                                                                                                                                                                           |
|-------|-----------------------------------------------------------------------------------------------------------------------------------|-----------------------------------------------------------------------------------------------------------------------------------------------------------------------------------------------------------------------------------------------------------|
|       |                                                                                                                                   | <input type="checkbox"/> Sunday                                                                                                                                                                                                                           |
| 1.4.2 | <b>If 'Shortness of breath' is equal to 'Yes' answer this question:</b><br>Have you experienced a worsening of the above symptom? | <input type="radio"/> Yes<br><input type="radio"/> No                                                                                                                                                                                                     |
| 1.5   | Sore throat                                                                                                                       | <input type="radio"/> Yes<br><input type="radio"/> No                                                                                                                                                                                                     |
| 1.5.1 | <b>If 'Sore throat' is equal to 'Yes' answer this question:</b><br>Which days did you experience sore throat?                     | <input type="checkbox"/> Monday<br><input type="checkbox"/> Tuesday<br><input type="checkbox"/> Wednesday<br><input type="checkbox"/> Thursday<br><input type="checkbox"/> Friday<br><input type="checkbox"/> Saturday<br><input type="checkbox"/> Sunday |
| 1.5.2 | <b>If 'Sore throat' is equal to 'Yes' answer this question:</b><br>Have you experienced a worsening of the above symptom?         | <input type="radio"/> Yes<br><input type="radio"/> No                                                                                                                                                                                                     |
| 1.6   | Blocked nose                                                                                                                      | <input type="radio"/> Yes<br><input type="radio"/> No                                                                                                                                                                                                     |
| 1.6.1 | <b>If 'Blocked nose' is equal to 'Yes' answer this question:</b><br>Which days did you experience blocked nose?                   | <input type="checkbox"/> Monday<br><input type="checkbox"/> Tuesday<br><input type="checkbox"/> Wednesday<br><input type="checkbox"/> Thursday<br><input type="checkbox"/> Friday<br><input type="checkbox"/> Saturday<br><input type="checkbox"/> Sunday |
| 1.6.2 | <b>If 'Blocked nose' is equal to 'Yes' answer this question:</b><br>Have you experienced a worsening of the above symptom?        | <input type="radio"/> Yes<br><input type="radio"/> No                                                                                                                                                                                                     |
| 1.7   | Red eyes                                                                                                                          | <input type="radio"/> Yes<br><input type="radio"/> No                                                                                                                                                                                                     |
| 1.7.1 | <b>If 'Red eyes' is equal to 'Yes' answer this question:</b><br>Which days did you experience red eyes?                           | <input type="checkbox"/> Monday<br><input type="checkbox"/> Tuesday<br><input type="checkbox"/> Wednesday<br><input type="checkbox"/> Thursday<br><input type="checkbox"/> Friday<br><input type="checkbox"/> Saturday<br><input type="checkbox"/> Sunday |
| 1.7.2 | <b>If 'Red eyes' is equal to 'Yes' answer this question:</b>                                                                      | <input type="radio"/> Yes<br><input type="radio"/> No                                                                                                                                                                                                     |

|        |                                                                                                                           |                                                                                                                                                                                                                                                           |
|--------|---------------------------------------------------------------------------------------------------------------------------|-----------------------------------------------------------------------------------------------------------------------------------------------------------------------------------------------------------------------------------------------------------|
|        | Have you experienced a worsening of the above symptom?                                                                    |                                                                                                                                                                                                                                                           |
| 1.8    | Headache                                                                                                                  | <input type="radio"/> Yes<br><input type="radio"/> No                                                                                                                                                                                                     |
| 1.8.1  | <b>If 'Headache' is equal to 'Yes' answer this question:</b><br>Which days did you experience headache?                   | <input type="checkbox"/> Monday<br><input type="checkbox"/> Tuesday<br><input type="checkbox"/> Wednesday<br><input type="checkbox"/> Thursday<br><input type="checkbox"/> Friday<br><input type="checkbox"/> Saturday<br><input type="checkbox"/> Sunday |
| 1.8.2  | <b>If 'Headache' is equal to 'Yes' answer this question:</b><br>Have you experienced a worsening of the above symptom?    | <input type="radio"/> Yes<br><input type="radio"/> No                                                                                                                                                                                                     |
| 1.9    | Joint pain                                                                                                                | <input type="radio"/> Yes<br><input type="radio"/> No                                                                                                                                                                                                     |
| 1.9.1  | <b>If 'Joint pain' is equal to 'Yes' answer this question:</b><br>Which days did you experience joint pain?               | <input type="checkbox"/> Monday<br><input type="checkbox"/> Tuesday<br><input type="checkbox"/> Wednesday<br><input type="checkbox"/> Thursday<br><input type="checkbox"/> Friday<br><input type="checkbox"/> Saturday<br><input type="checkbox"/> Sunday |
| 1.9.2  | <b>If 'Joint pain' is equal to 'Yes' answer this question:</b><br>Have you experienced a worsening of the above symptom?  | <input type="radio"/> Yes<br><input type="radio"/> No                                                                                                                                                                                                     |
| 1.10   | Muscle pain                                                                                                               | <input type="radio"/> Yes<br><input type="radio"/> No                                                                                                                                                                                                     |
| 1.10.1 | <b>If 'Muscle pain' is equal to 'Yes' answer this question:</b><br>Which days did you experience muscle pain?             | <input type="checkbox"/> Monday<br><input type="checkbox"/> Tuesday<br><input type="checkbox"/> Wednesday<br><input type="checkbox"/> Thursday<br><input type="checkbox"/> Friday<br><input type="checkbox"/> Saturday<br><input type="checkbox"/> Sunday |
| 1.10.2 | <b>If 'Muscle pain' is equal to 'Yes' answer this question:</b><br>Have you experienced a worsening of the above symptom? | <input type="radio"/> Yes<br><input type="radio"/> No                                                                                                                                                                                                     |
| 1.11   | Fatigue                                                                                                                   | <input type="radio"/> Yes<br><input type="radio"/> No                                                                                                                                                                                                     |



|                                                       |        |                                                                                                                       |                                                                                                                                                                                                                                                           |
|-------------------------------------------------------|--------|-----------------------------------------------------------------------------------------------------------------------|-----------------------------------------------------------------------------------------------------------------------------------------------------------------------------------------------------------------------------------------------------------|
| 1<br>2<br>3<br>4<br>5<br>6<br>7<br>8<br>9<br>10<br>11 | 1.11.1 | <b>If 'Fatigue' is equal to 'Yes' answer this question:</b><br>Which days did you experience fatigue?                 | <input type="checkbox"/> Monday<br><input type="checkbox"/> Tuesday<br><input type="checkbox"/> Wednesday<br><input type="checkbox"/> Thursday<br><input type="checkbox"/> Friday<br><input type="checkbox"/> Saturday<br><input type="checkbox"/> Sunday |
| 12<br>13<br>14<br>15<br>16                            | 1.11.2 | <b>If 'Fatigue' is equal to 'Yes' answer this question:</b><br>Have you experienced a worsening of the above symptom? | <input type="radio"/> Yes<br><input type="radio"/> No                                                                                                                                                                                                     |
| 17<br>18<br>19<br>20                                  | 1.12   | Chills                                                                                                                | <input type="radio"/> Yes<br><input type="radio"/> No                                                                                                                                                                                                     |
| 21<br>22<br>23<br>24<br>25<br>26<br>27<br>28<br>29    | 1.12.1 | <b>If 'Chills' is equal to 'Yes' answer this question:</b><br>Which days did you experience chills?                   | <input type="checkbox"/> Monday<br><input type="checkbox"/> Tuesday<br><input type="checkbox"/> Wednesday<br><input type="checkbox"/> Thursday<br><input type="checkbox"/> Friday<br><input type="checkbox"/> Saturday<br><input type="checkbox"/> Sunday |
| 30<br>31<br>32<br>33<br>34                            | 1.12.2 | <b>If 'Chills' is equal to 'Yes' answer this question:</b><br>Have you experienced a worsening of the above symptom?  | <input type="radio"/> Yes<br><input type="radio"/> No                                                                                                                                                                                                     |
| 35<br>36<br>37                                        | 1.13   | Nausea                                                                                                                | <input type="radio"/> Yes<br><input type="radio"/> No                                                                                                                                                                                                     |
| 38<br>39<br>40<br>41<br>42<br>43<br>44<br>45<br>46    | 1.13.1 | <b>If 'Nausea' is equal to 'Yes' answer this question:</b><br>Which days did you experience nausea?                   | <input type="checkbox"/> Monday<br><input type="checkbox"/> Tuesday<br><input type="checkbox"/> Wednesday<br><input type="checkbox"/> Thursday<br><input type="checkbox"/> Friday<br><input type="checkbox"/> Saturday<br><input type="checkbox"/> Sunday |
| 47<br>48<br>49<br>50<br>51                            | 1.13.2 | <b>If 'Nausea' is equal to 'Yes' answer this question:</b><br>Have you experienced a worsening of the above symptom?  | <input type="radio"/> Yes<br><input type="radio"/> No                                                                                                                                                                                                     |
| 52<br>53<br>54                                        | 1.14   | Vomiting                                                                                                              | <input type="radio"/> Yes<br><input type="radio"/> No                                                                                                                                                                                                     |
| 55<br>56<br>57<br>58<br>59<br>60                      | 1.14.1 | <b>If 'Vomiting' is equal to 'Yes' answer this question:</b><br>Which days did you experience vomiting?               | <input type="checkbox"/> Monday<br><input type="checkbox"/> Tuesday<br><input type="checkbox"/> Wednesday<br><input type="checkbox"/> Thursday<br><input type="checkbox"/> Friday                                                                         |



|        |                                                                                                                                       |                                                                                                                                                                                                                                                           |
|--------|---------------------------------------------------------------------------------------------------------------------------------------|-----------------------------------------------------------------------------------------------------------------------------------------------------------------------------------------------------------------------------------------------------------|
|        |                                                                                                                                       | <input type="checkbox"/> Saturday<br><input type="checkbox"/> Sunday                                                                                                                                                                                      |
| 1.14.2 | <b>If 'Vomiting' is equal to 'Yes' answer this question:</b><br>Have you experienced a worsening of the above symptom?                | <input type="radio"/> Yes<br><input type="radio"/> No                                                                                                                                                                                                     |
| 1.15   | Diarrhoea                                                                                                                             | <input type="radio"/> Yes<br><input type="radio"/> No                                                                                                                                                                                                     |
| 1.15.1 | <b>If 'Diarrhoea' is equal to 'Yes' answer this question:</b><br>Which days did you experience diarrhoea?                             | <input type="checkbox"/> Monday<br><input type="checkbox"/> Tuesday<br><input type="checkbox"/> Wednesday<br><input type="checkbox"/> Thursday<br><input type="checkbox"/> Friday<br><input type="checkbox"/> Saturday<br><input type="checkbox"/> Sunday |
| 1.15.2 | <b>If 'Diarrhoea' is equal to 'Yes' answer this question:</b><br>Have you experienced a worsening of the above symptom?               | <input type="radio"/> Yes<br><input type="radio"/> No                                                                                                                                                                                                     |
| 1.16   | Loss of smell or taste                                                                                                                | <input type="radio"/> Yes<br><input type="radio"/> No                                                                                                                                                                                                     |
| 1.16.1 | <b>If 'Loss of smell or taste' is equal to 'Yes' answer this question:</b><br>Which days did you experience loss of smell or taste?   | <input type="checkbox"/> Monday<br><input type="checkbox"/> Tuesday<br><input type="checkbox"/> Wednesday<br><input type="checkbox"/> Thursday<br><input type="checkbox"/> Friday<br><input type="checkbox"/> Saturday<br><input type="checkbox"/> Sunday |
| 1.16.2 | <b>If 'Loss of smell or taste' is equal to 'Yes' answer this question:</b><br>Have you experienced a worsening of the above symptom?  | <input type="radio"/> Yes<br><input type="radio"/> No                                                                                                                                                                                                     |
| 1.17   | Other symptoms                                                                                                                        |                                                                                                                                                                                                                                                           |
| 2.1    | Has your child changed medication this week?                                                                                          | <input type="radio"/> Yes<br><input type="radio"/> No                                                                                                                                                                                                     |
| 2.1.1  | <b>If 'Has your child changed medication this week?' if equal to 'Yes' answer this question:</b> What medication has changed and how? |                                                                                                                                                                                                                                                           |

|       |                                                                                                                                                                                                                                        |                                                                                                                                                                                                                |
|-------|----------------------------------------------------------------------------------------------------------------------------------------------------------------------------------------------------------------------------------------|----------------------------------------------------------------------------------------------------------------------------------------------------------------------------------------------------------------|
| 2.2   | Was your child in contact with someone who is diagnosed with or suspected to have coronavirus?                                                                                                                                         | <input type="radio"/> Yes<br><input type="radio"/> No<br><input type="radio"/> Not known                                                                                                                       |
| 2.3   | Did your child visit the NHS because you were worried about coronavirus infection?                                                                                                                                                     | <input type="radio"/> Yes<br><input type="radio"/> No<br><input type="radio"/> Not known                                                                                                                       |
| 2.4   | Did your child have a test for coronavirus?                                                                                                                                                                                            | <input type="radio"/> Yes<br><input type="radio"/> No<br><input type="radio"/> Not known                                                                                                                       |
| 2.5   | Did your child have a confirmed diagnosis of coronavirus infection?                                                                                                                                                                    | <input type="radio"/> Yes<br><input type="radio"/> No<br><input type="radio"/> Not known                                                                                                                       |
| 2.6   | Was your child admitted to hospital because of a coronavirus infection?                                                                                                                                                                | <input type="radio"/> Yes<br><input type="radio"/> No<br><input type="radio"/> Not known                                                                                                                       |
| 2.6.1 | <b>If 'Was your child admitted to hospital because of a coronavirus infection?' is equal to 'Yes' answer this question:</b> When was your child admitted?                                                                              | dd-mm-yyyy                                                                                                                                                                                                     |
| 2.6.2 | <b>If 'Was your child admitted to hospital because of a coronavirus infection?' is equal to 'Yes' answer this question:</b> How many days was your child admitted?                                                                     |                                                                                                                                                                                                                |
| 2.7   | Did you have to self-isolate your child because they had symptoms or because of medical advice related to coronavirus?                                                                                                                 | <input type="radio"/> Yes<br><input type="radio"/> No<br><input type="radio"/> Not known                                                                                                                       |
| 2.7.1 | <b>If 'Did you have to self-isolate your child because they had symptoms or because of medical advice related to coronavirus?' is equal to 'Yes' answer this question:</b><br>How many days did you self-isolate your child this week? | <input type="checkbox"/> 1<br><input type="checkbox"/> 2<br><input type="checkbox"/> 3<br><input type="checkbox"/> 4<br><input type="checkbox"/> 5<br><input type="checkbox"/> 6<br><input type="checkbox"/> 7 |
| 2.8   | Were immunosuppressive drugs postponed because of coronavirus infection?                                                                                                                                                               | <input type="radio"/> Yes<br><input type="radio"/> No<br><input type="radio"/> Not known                                                                                                                       |
| 2.8.1 | <b>If 'Were immunosuppressive drugs postponed because of coronavirus infection?' is equal to 'Yes' answer this question:</b> How many days did you                                                                                     | <input type="checkbox"/> 1<br><input type="checkbox"/> 2<br><input type="checkbox"/> 3<br><input type="checkbox"/> 4                                                                                           |

|        |                                                                                                                                                                                  |                                                                                                                                                                                                                |
|--------|----------------------------------------------------------------------------------------------------------------------------------------------------------------------------------|----------------------------------------------------------------------------------------------------------------------------------------------------------------------------------------------------------------|
|        | postpone the immunosuppressants this week?                                                                                                                                       | <input type="checkbox"/> 5<br><input type="checkbox"/> 6<br><input type="checkbox"/> 7                                                                                                                         |
| 2.9    | Did your child miss any sports or fun activities because of the coronavirus pandemic?                                                                                            | <input type="radio"/> Yes<br><input type="radio"/> No<br><input type="radio"/> Not known                                                                                                                       |
| 2.9.1  | <b>If 'Did your child miss any sports or fun activities because of the coronavirus pandemic?' is equal to Yes answer this question:</b> How many activities did your child miss? |                                                                                                                                                                                                                |
| 2.10   | Did your child miss school because of coronavirus infection?                                                                                                                     | <input type="radio"/> Yes<br><input type="radio"/> No<br><input type="radio"/> Not known                                                                                                                       |
| 2.10.1 | <b>If 'Did your child miss school because of coronavirus infection?' is equal to Yes answer this question:</b> How many days of school did your child miss this week?            | <input type="checkbox"/> 1<br><input type="checkbox"/> 2<br><input type="checkbox"/> 3<br><input type="checkbox"/> 4<br><input type="checkbox"/> 5<br><input type="checkbox"/> 6<br><input type="checkbox"/> 7 |
| 2.11   | On a scale of 0-10, how worried are you about coronavirus affecting your child? (0 = not worried, 10 = extremely worried)                                                        |                                                                                                                                                                                                                |
| 2.12   | Is there anything that you are particularly worried about that you would like to share?                                                                                          |                                                                                                                                                                                                                |

## Appendix C:

### Symptom frequency by primary diagnosis

| Symptoms     | JIA (%) | Other rheumatology diagnosis (%) | Airways disease (%) | Immunodeficiency disorder (%) | Diabetes (%) | Solid organ or bone marrow transplant (%) | Nephrotic syndrome (%) | Other kidney disease (%) | IBD (%) | Other gastroenterology and hepatology (%) | Malignant haematology & oncology (%) | Neurology (%) | Other (%) |
|--------------|---------|----------------------------------|---------------------|-------------------------------|--------------|-------------------------------------------|------------------------|--------------------------|---------|-------------------------------------------|--------------------------------------|---------------|-----------|
| Fever        | 1.63    | 0.81                             | 0.24                | 0.73                          | 0.16         | 0.41                                      | 0.08                   | 0.08                     | 0.00    | 0.08                                      | 0.57                                 | 0.24          | 0.33      |
| Cough        | 4.80    | 1.54                             | 1.63                | 1.54                          | 0.24         | 1.46                                      | 0.57                   | 0.16                     | 0.08    | 0.00                                      | 0.89                                 | 0.16          | 0.65      |
| SOB          | 1.63    | 0.89                             | 0.65                | 0.65                          | 0.08         | 0.08                                      | 0.16                   | 0.08                     | 0.16    | 0.00                                      | 0.16                                 | 0.08          | 0.81      |
| Sore throat  | 6.02    | 2.28                             | 0.98                | 0.98                          | 0.16         | 0.41                                      | 0.24                   | 0.24                     | 0.49    | 0.33                                      | 0.89                                 | 0.33          | 0.89      |
| Blocked nose | 7.48    | 2.60                             | 1.79                | 1.30                          | 0.49         | 1.30                                      | 0.65                   | 0.41                     | 0.73    | 0.08                                      | 0.57                                 | 0.24          | 1.22      |
| Red eyes     | 4.07    | 2.11                             | 0.57                | 1.14                          | 0.49         | 0.41                                      | 0.49                   | 0.08                     | 0.33    | 0.08                                      | 0.57                                 | 0.16          | 0.57      |
| Headache     | 11.30   | 4.96                             | 1.30                | 2.20                          | 0.98         | 1.54                                      | 0.65                   | 0.33                     | 0.98    | 0.49                                      | 1.87                                 | 0.73          | 1.63      |
| Vomiting     | 3.66    | 0.89                             | 0.33                | 0.65                          | 0.08         | 0.89                                      | 0.24                   | 0.24                     | 0.00    | 0.16                                      | 1.14                                 | 0.08          | 0.98      |
| Diarrhoea    | 4.23    | 1.63                             | 0.57                | 1.46                          | 0.49         | 0.81                                      | 0.33                   | 0.33                     | 0.81    | 0.16                                      | 0.73                                 | 0.24          | 0.73      |
| Joint pain   | 19.84   | 3.98                             | 0.24                | 1.22                          | 0.16         | 1.30                                      | 0.65                   | 0.24                     | 0.81    | 0.08                                      | 1.87                                 | 0.41          | 1.06      |
| Muscle pain  | 8.46    | 3.33                             | 0.57                | 1.22                          | 0.33         | 1.06                                      | 0.65                   | 0.24                     | 0.49    | 0.16                                      | 1.38                                 | 0.33          | 0.81      |
| Fatigue      | 13.98   | 4.07                             | 1.30                | 2.60                          | 0.49         | 1.30                                      | 0.89                   | 0.57                     | 1.30    | 0.49                                      | 3.25                                 | 0.89          | 1.30      |
| Chills       | 2.11    | 1.06                             | 0.08                | 0.49                          | 0.08         | 0.41                                      | 0.08                   | 0.08                     | 0.24    | 0.16                                      | 0.33                                 | 0.33          | 0.24      |

Abbreviations: SOB shortness of breath, JIA juvenile idiopathic arthritis, IBD inflammatory bowel disease

1  
2  
3  
4  
5  
6  
7  
8  
9  
10  
11  
12  
13  
14  
15  
16  
17  
18  
19  
20  
21  
22  
23  
24  
25  
26  
27  
28  
29  
30  
31  
32  
33  
34  
35  
36  
37  
38  
39  
40  
41  
42  
43  
44  
45  
46

### Symptom frequency by medication

| Symptoms      | Methotrexate (%) | Hydroxychloroquine (%) | Other DMARDs (%) | Corticosteroids (%) | Anti-TNF therapy (%) | Tocilizumab (%) | Other biologic drugs (%) | MMF (%) |
|---------------|------------------|------------------------|------------------|---------------------|----------------------|-----------------|--------------------------|---------|
| Fever         | 4.92             | 9.09                   | 0.92             | 5.62                | 4.62                 | 4.08            | 11.11                    | 5.34    |
| Cough         | 12.44            | 14.55                  | 9.17             | 14.06               | 15.84                | 4.08            | 8.33                     | 15.27   |
| SOB           | 3.11             | 3.64                   | 1.83             | 6.02                | 4.29                 | 8.16            | 5.56                     | 4.58    |
| Sore throat   | 16.06            | 21.82                  | 18.35            | 11.24               | 18.15                | 18.37           | 8.33                     | 10.69   |
| Blocked nose  | 19.69            | 25.45                  | 13.76            | 13.65               | 23.76                | 14.29           | 19.44                    | 17.56   |
| Red eyes      | 12.69            | 10.91                  | 8.26             | 10.44               | 11.55                | 14.29           | 13.89                    | 6.11    |
| Headache      | 29.27            | 45.45                  | 29.36            | 28.11               | 30.69                | 28.57           | 27.78                    | 25.19   |
| Vomiting      | 12.18            | 9.09                   | 4.59             | 12.05               | 8.25                 | 12.24           | 8.33                     | 7.63    |
| Diarrhoea     | 9.84             | 10.91                  | 11.93            | 11.65               | 11.88                | 20.41           | 8.33                     | 12.98   |
| Joint pain    | 43.78            | 43.64                  | 33.03            | 26.91               | 46.20                | 69.39           | 36.11                    | 22.14   |
| Muscle pain   | 20.98            | 41.82                  | 22.02            | 24.50               | 21.45                | 30.61           | 25.00                    | 19.08   |
| Fatigue       | 39.12            | 43.64                  | 29.36            | 34.14               | 34.65                | 40.82           | 38.89                    | 24.43   |
| Chills        | 5.44             | 12.73                  | 5.50             | 7.23                | 6.93                 | 6.12            | 5.56                     | 6.87    |
| Nausea        | 31.09            | 27.27                  | 15.60            | 20.88               | 25.41                | 26.53           | 16.67                    | 15.27   |
| Loss of smell | 0.52             | 1.82                   | 0.00             | 0.80                | 0.33                 | 0.00            | 0.00                     | 1.53    |

Abbreviations: DMARDs disease modifying anti-rheumatic drugs, MMF mycophenolate mofetil

| Symptoms      | Chemotherapy (%) | Azathioprine (%) | Other antibiotics and antivirals (%) | Tacrolimus (%) | Inhalers (%) | Insulin (%) | NSAIDs (%) | IV or SC IG (%) |
|---------------|------------------|------------------|--------------------------------------|----------------|--------------|-------------|------------|-----------------|
| Fever         | 10.29            | 7.35             | 7.14                                 | 3.80           | 8.14         | 3.66        | 9.72       | 2.63            |
| Cough         | 14.71            | 25.00            | 18.45                                | 15.19          | 31.40        | 8.54        | 15.28      | 13.16           |
| SOB           | 5.88             | 8.82             | 5.95                                 | 3.16           | 16.28        | 3.66        | 8.33       | 7.89            |
| Sore throat   | 8.82             | 13.24            | 10.71                                | 6.96           | 18.60        | 7.32        | 13.89      | 0.00            |
| Blocked nose  | 10.29            | 16.18            | 13.69                                | 14.56          | 36.05        | 9.76        | 25.00      | 10.53           |
| Red eyes      | 10.29            | 8.82             | 9.52                                 | 5.70           | 15.12        | 9.76        | 16.67      | 5.26            |
| Headache      | 27.94            | 32.35            | 20.83                                | 18.35          | 32.56        | 25.61       | 44.44      | 15.79           |
| Vomiting      | 22.06            | 10.29            | 14.29                                | 8.86           | 12.79        | 7.32        | 9.72       | 5.26            |
| Diarrhoea     | 14.71            | 10.29            | 13.10                                | 10.13          | 12.79        | 10.98       | 12.50      | 5.26            |
| Joint pain    | 29.41            | 14.71            | 20.24                                | 17.09          | 18.60        | 8.54        | 61.11      | 18.42           |
| Muscle pain   | 23.53            | 11.76            | 17.26                                | 14.56          | 19.77        | 7.32        | 31.94      | 7.89            |
| Fatigue       | 47.06            | 30.88            | 30.36                                | 18.35          | 30.23        | 17.07       | 54.17      | 18.42           |
| Chills        | 7.35             | 2.94             | 4.17                                 | 3.80           | 6.98         | 1.22        | 11.11      | 0.00            |
| Nausea        | 30.88            | 19.12            | 17.86                                | 12.66          | 20.93        | 10.98       | 27.78      | 10.53           |
| Loss of smell | 0.00             | 0.00             | 0.00                                 | 1.27           | 1.16         | 0.00        | 4.17       | 0.00            |

Abbreviations: NSAIDs non-steroid anti-inflammatory drugs, IV intravenous, SC subcutaneous, IG immunoglobulin

STROBE Statement—Checklist of items that should be included in reports of *cohort studies*

|                              | Item No | Recommendation                                                                                                                                                                                                                                                                                                         | Page No |
|------------------------------|---------|------------------------------------------------------------------------------------------------------------------------------------------------------------------------------------------------------------------------------------------------------------------------------------------------------------------------|---------|
| <b>Title and abstract</b>    | 1       | (a) Indicate the study's design with a commonly used term in the title or the abstract                                                                                                                                                                                                                                 | 2       |
|                              |         | (b) Provide in the abstract an informative and balanced summary of what was done and what was found                                                                                                                                                                                                                    | 2       |
| <b>Introduction</b>          |         |                                                                                                                                                                                                                                                                                                                        |         |
| Background/rationale         | 2       | Explain the scientific background and rationale for the investigation being reported                                                                                                                                                                                                                                   | 4       |
| Objectives                   | 3       | State specific objectives, including any prespecified hypotheses                                                                                                                                                                                                                                                       | 4       |
| <b>Methods</b>               |         |                                                                                                                                                                                                                                                                                                                        |         |
| Study design                 | 4       | Present key elements of study design early in the paper                                                                                                                                                                                                                                                                | 4-6     |
| Setting                      | 5       | Describe the setting, locations, and relevant dates, including periods of recruitment, exposure, follow-up, and data collection                                                                                                                                                                                        | 4-6     |
| Participants                 | 6       | (a) Give the eligibility criteria, and the sources and methods of selection of participants. Describe methods of follow-up<br>(b) For matched studies, give matching criteria and number of exposed and unexposed                                                                                                      | 4-6     |
| Variables                    | 7       | Clearly define all outcomes, exposures, predictors, potential confounders, and effect modifiers. Give diagnostic criteria, if applicable                                                                                                                                                                               | 4-6     |
| Data sources/<br>measurement | 8*      | For each variable of interest, give sources of data and details of methods of assessment (measurement). Describe comparability of assessment methods if there is more than one group                                                                                                                                   | 4-6     |
| Bias                         | 9       | Describe any efforts to address potential sources of bias                                                                                                                                                                                                                                                              | 4-6     |
| Study size                   | 10      | Explain how the study size was arrived at                                                                                                                                                                                                                                                                              | 4-6     |
| Quantitative variables       | 11      | Explain how quantitative variables were handled in the analyses. If applicable, describe which groupings were chosen and why                                                                                                                                                                                           | 4-6     |
| Statistical methods          | 12      | (a) Describe all statistical methods, including those used to control for confounding<br>(b) Describe any methods used to examine subgroups and interactions<br>(c) Explain how missing data were addressed<br>(d) If applicable, explain how loss to follow-up was addressed<br>(e) Describe any sensitivity analyses | 4-6     |
| <b>Results</b>               |         |                                                                                                                                                                                                                                                                                                                        |         |
| Participants                 | 13*     | (a) Report numbers of individuals at each stage of study—eg numbers potentially eligible, examined for eligibility, confirmed eligible, included in the study, completing follow-up, and analysed<br>(b) Give reasons for non-participation at each stage<br>(c) Consider use of a flow diagram                        | 6       |
| Descriptive data             | 14*     | (a) Give characteristics of study participants (eg demographic, clinical, social) and information on exposures and potential confounders<br>(b) Indicate number of participants with missing data for each variable of interest<br>(c) Summarise follow-up time (eg, average and total amount)                         | 6-8     |
| Outcome data                 | 15*     | Report numbers of outcome events or summary measures over time                                                                                                                                                                                                                                                         | 6-8     |

|    |                          |    |                                                                                                                                                                                                              |      |
|----|--------------------------|----|--------------------------------------------------------------------------------------------------------------------------------------------------------------------------------------------------------------|------|
| 1  | Main results             | 16 | (a) Give unadjusted estimates and, if applicable, confounder-adjusted estimates and their precision (eg, 95% confidence interval). Make clear which confounders were adjusted for and why they were included | 6-8  |
| 2  |                          |    | (b) Report category boundaries when continuous variables were categorized                                                                                                                                    |      |
| 3  |                          |    | (c) If relevant, consider translating estimates of relative risk into absolute risk for a meaningful time period                                                                                             |      |
| 4  |                          |    |                                                                                                                                                                                                              |      |
| 5  |                          |    |                                                                                                                                                                                                              |      |
| 6  |                          |    |                                                                                                                                                                                                              |      |
| 7  |                          |    |                                                                                                                                                                                                              |      |
| 8  |                          |    |                                                                                                                                                                                                              |      |
| 9  | Other analyses           | 17 | Report other analyses done—eg analyses of subgroups and interactions, and sensitivity analyses                                                                                                               | 6-8  |
| 10 |                          |    |                                                                                                                                                                                                              |      |
| 11 | <b>Discussion</b>        |    |                                                                                                                                                                                                              |      |
| 12 |                          |    |                                                                                                                                                                                                              |      |
| 13 | Key results              | 18 | Summarise key results with reference to study objectives                                                                                                                                                     | 8-10 |
| 14 | Limitations              | 19 | Discuss limitations of the study, taking into account sources of potential bias or imprecision. Discuss both direction and magnitude of any potential bias                                                   | 8-10 |
| 15 |                          |    |                                                                                                                                                                                                              |      |
| 16 | Interpretation           | 20 | Give a cautious overall interpretation of results considering objectives, limitations, multiplicity of analyses, results from similar studies, and other relevant evidence                                   | 11   |
| 17 |                          |    |                                                                                                                                                                                                              |      |
| 18 |                          |    |                                                                                                                                                                                                              |      |
| 19 | Generalisability         | 21 | Discuss the generalisability (external validity) of the study results                                                                                                                                        | 11   |
| 20 |                          |    |                                                                                                                                                                                                              |      |
| 21 | <b>Other information</b> |    |                                                                                                                                                                                                              |      |
| 22 | Funding                  | 22 | Give the source of funding and the role of the funders for the present study and, if applicable, for the original study on which the present article is based                                                | 12   |
| 23 |                          |    |                                                                                                                                                                                                              |      |
| 24 |                          |    |                                                                                                                                                                                                              |      |

\*Give information separately for exposed and unexposed groups.

**Note:** An Explanation and Elaboration article discusses each checklist item and gives methodological background and published examples of transparent reporting. The STROBE checklist is best used in conjunction with this article (freely available on the Web sites of PLoS Medicine at <http://www.plosmedicine.org/>, Annals of Internal Medicine at <http://www.annals.org/>, and Epidemiology at <http://www.epidem.com/>). Information on the STROBE Initiative is available at <http://www.strobe-statement.org>.



# BMJ Open

## COVID-19 symptom surveillance in immunocompromised children and young people in the UK: a prospective observational cohort study

|                                 |                                                                                                                                                                                                                                                                                                                                                                                                                                                                                                                                                                                                                                                                                                                                                                                                  |
|---------------------------------|--------------------------------------------------------------------------------------------------------------------------------------------------------------------------------------------------------------------------------------------------------------------------------------------------------------------------------------------------------------------------------------------------------------------------------------------------------------------------------------------------------------------------------------------------------------------------------------------------------------------------------------------------------------------------------------------------------------------------------------------------------------------------------------------------|
| Journal:                        | <i>BMJ Open</i>                                                                                                                                                                                                                                                                                                                                                                                                                                                                                                                                                                                                                                                                                                                                                                                  |
| Manuscript ID                   | bmjopen-2020-044899.R1                                                                                                                                                                                                                                                                                                                                                                                                                                                                                                                                                                                                                                                                                                                                                                           |
| Article Type:                   | Original research                                                                                                                                                                                                                                                                                                                                                                                                                                                                                                                                                                                                                                                                                                                                                                                |
| Date Submitted by the Author:   | 23-Dec-2020                                                                                                                                                                                                                                                                                                                                                                                                                                                                                                                                                                                                                                                                                                                                                                                      |
| Complete List of Authors:       | Shaunak, Meera; NIHR Southampton Clinical Research Facility<br>Patel, Ravin; University of Southampton Faculty of Medicine<br>Driessens, Corine; University of Southampton<br>Mills, Lynne; NIHR Southampton Clinical Research Facility<br>Leahy, Alice; University Hospital Southampton NHS Foundation Trust<br>Gbesemete, Diane; NIHR Southampton Clinical Research Facility;<br>University of Southampton Faculty of Medicine<br>Owens, Daniel; NIHR Southampton Clinical Research Facility; University<br>of Southampton Faculty of Medicine<br>Lucas, JS; University Hospital Southampton NHS Foundation Trust<br>Faust, Saul; NIHR Southampton Clinical Research Facility<br>de Graaf, Hans; NIHR Southampton Clinical Research Facility; University<br>of Southampton Faculty of Medicine |
| <b>Primary Subject Heading</b>: | Paediatrics                                                                                                                                                                                                                                                                                                                                                                                                                                                                                                                                                                                                                                                                                                                                                                                      |
| Secondary Subject Heading:      | Paediatrics, Infectious diseases, Immunology (including allergy)                                                                                                                                                                                                                                                                                                                                                                                                                                                                                                                                                                                                                                                                                                                                 |
| Keywords:                       | COVID-19, PAEDIATRICS, Paediatric infectious disease & immunisation < PAEDIATRICS, IMMUNOLOGY                                                                                                                                                                                                                                                                                                                                                                                                                                                                                                                                                                                                                                                                                                    |
|                                 |                                                                                                                                                                                                                                                                                                                                                                                                                                                                                                                                                                                                                                                                                                                                                                                                  |

SCHOLARONE™  
Manuscripts



I, the Submitting Author has the right to grant and does grant on behalf of all authors of the Work (as defined in the below author licence), an exclusive licence and/or a non-exclusive licence for contributions from authors who are: i) UK Crown employees; ii) where BMJ has agreed a CC-BY licence shall apply, and/or iii) in accordance with the terms applicable for US Federal Government officers or employees acting as part of their official duties; on a worldwide, perpetual, irrevocable, royalty-free basis to BMJ Publishing Group Ltd ("BMJ") its licensees and where the relevant Journal is co-owned by BMJ to the co-owners of the Journal, to publish the Work in this journal and any other BMJ products and to exploit all rights, as set out in our [licence](#).

The Submitting Author accepts and understands that any supply made under these terms is made by BMJ to the Submitting Author unless you are acting as an employee on behalf of your employer or a postgraduate student of an affiliated institution which is paying any applicable article publishing charge ("APC") for Open Access articles. Where the Submitting Author wishes to make the Work available on an Open Access basis (and intends to pay the relevant APC), the terms of reuse of such Open Access shall be governed by a Creative Commons licence – details of these licences and which [Creative Commons](#) licence will apply to this Work are set out in our licence referred to above.

Other than as permitted in any relevant BMJ Author's Self Archiving Policies, I confirm this Work has not been accepted for publication elsewhere, is not being considered for publication elsewhere and does not duplicate material already published. I confirm all authors consent to publication of this Work and authorise the granting of this licence.

1  
2  
3  
4  
5 **COVID-19 symptom surveillance in immunocompromised**  
6  
7 **children and young people in the UK: a prospective**  
8  
9 **observational cohort study**  
10  
11

12  
13 Meera Shaunak<sup>1\*</sup>, Ravin Patel<sup>2\*</sup>, Corine Driessens<sup>2,4</sup>, Lynne Mills<sup>1</sup>, Alice Leahy<sup>3</sup>,  
14 Diane Gbesemete<sup>1,2</sup>, Daniel Owens<sup>1,2</sup>, Jane S Lucas<sup>2,4,5</sup>, Saul N Faust<sup>1,2,5+</sup>, Hans de  
15 Graaf<sup>1,2,3+</sup>  
16  
17

18  
19  
20 On behalf of the ImmunoCOVID19 study group (a full list of co-authors is provided in  
21 Supplementary Online Appendix A)  
22  
23

24  
25 \* and + Equal contribution  
26  
27

28  
29 <sup>1</sup> NIHR Southampton Clinical Research Facility, University Hospital Southampton  
30 NHS Foundation Trust, Southampton, UK  
31

32 <sup>2</sup> Faculty of Medicine and Institute for Life Sciences, University of Southampton,  
33 Southampton, UK  
34

35 <sup>3</sup> Paediatric Rheumatology, University Hospital Southampton NHS Foundation Trust,  
36 Southampton, UK  
37

38 <sup>4</sup> PCD Centre, University Hospital Southampton NHS Foundation Trust,  
39 Southampton, UK  
40

41 <sup>5</sup> NIHR Southampton Biomedical Research Centre, University Hospital Southampton  
42 NHS Foundation Trust  
43  
44  
45

46  
47 **Corresponding author:** Dr Hans de Graaf [h.de-graaf@soton.ac.uk](mailto:h.de-graaf@soton.ac.uk), Paediatric  
48 Rheumatology, University Hospital Southampton NHS Foundation Trust, Tremona  
49 Road, Southampton, SO16 6YD  
50  
51  
52

53  
54 **Word count:** 2050 (excluding title page, abstract, references, figures and tables)  
55  
56

57  
58 **Keywords:** SARS-CoV-2, symptoms, children, immunocompromise  
59  
60

## ABSTRACT

**Objectives:** To describe the frequency of symptoms compatible with SARS-CoV-2 infection in immunocompromised children and young people in the United Kingdom during the SARS-CoV-2 pandemic. To describe patient/ parent anxiety regarding SARS-CoV-2 infection in this cohort.

**Design:** A prospective observational cohort study.

**Setting:** 46 centres across the United Kingdom between 16<sup>th</sup> March and 4<sup>th</sup> July 2020. A weekly online questionnaire based on the ISARIC-WHO Case Report Form was used to collect participant reported data on symptoms, test results, NHS attendance, hospital admission and impact on daily life.

**Participants:** 1490 immunocompromised children, defined as those requiring an annual influenza vaccination due to their underlying condition or medication.

**Main outcome measures:** Incidence of SARS-CoV-2-like symptoms and patient/parent anxiety score.

**Results:** Over 16 weeks during the first wave of the pandemic, no SARS-CoV-2 infection was diagnosed in this large immunocompromised paediatric cohort (median age 11 years, 54.4% female). 110 symptomatic participants underwent a test for SARS-CoV-2; all were negative. 922 (67.4%) participants reported at least one symptom consistent with suspected SARS-CoV-2 infection over the study period. 476 (34.8%) reported three or more symptoms. The most frequently reported symptoms included joint pain, fatigue, headache, nausea and muscle pain. SARS-CoV-2 testing during this period was performed on admitted patients only. 137 participants had their medication suspended or changed during the study period, due to assumed COVID-19 disease risk. 62% reported high levels of anxiety (scores of 7-10 out of 10) at the start of the study, with anxiety levels remaining high throughout the study period.

**Conclusions:** Although symptoms related to SARS-CoV-2 infection in children were common, there were no positive tests in this large immunocompromised cohort. Symptom-based screening to facilitate early detection of SARS-CoV-2 infection may not be helpful in these individuals. Patient/ parent anxiety about SARS-CoV-2 infection was high.

**Trial registration:** NCT04382508

**Strengths:**

- Large prospective cohort of immunocompromised children
- High response rate of patients to questionnaire

**Limitations:**

- Patient reported data
- Limited SARS-CoV-2 testing due to shortage in national supply

For peer review only

1  
2  
3  
4  
5  
6  
7  
8  
9  
10  
11  
12  
13  
14  
15  
16  
17  
18  
19  
20  
21  
22  
23  
24  
25  
26  
27  
28  
29  
30  
31  
32  
33  
34  
35  
36  
37  
38  
39  
40  
41  
42  
43  
44  
45  
46  
47  
48  
49  
50  
51  
52  
53  
54  
55  
56  
57  
58  
59  
60

For peer review only

## INTRODUCTION

The 2019 coronavirus pandemic (COVID-19) is an ongoing global health crisis with over 11,500,000 cases and in excess of 500,000 deaths worldwide. The illness is caused by severe acute respiratory syndrome coronavirus 2 (SARS-CoV-2). As of 5<sup>th</sup> August 2020, the World Health Organisation (WHO) reported 306,297 cumulative cases of confirmed SARS-CoV-2 infection in the United Kingdom (UK) population of 68.1 million, giving a cumulative incidence of 0.004% [1].

SARS-CoV-2 causes mild or moderate upper respiratory tract infection in the majority of children, with fever and cough being the most common symptoms, although many are asymptomatic [2]. In children, fewer cases of SARS-CoV-2 infection have been reported compared to adults [3]. However, it remains unclear how many children in the community have been infected, with the results of seroprevalence studies awaited [4].

Data demonstrating an increased risk of severe disease in immunocompromised adults are emerging (A. Richter, personal communication, publication submitted). Children with significant co-morbidities are also currently considered to be at higher risk of severe infection. They were given specific precautionary advice when UK lockdown was applied, to slow the spread of SARS-CoV-2, on 23<sup>rd</sup> March 2020 [5,6].

The primary objective of this study is to describe the frequency of symptoms compatible with SARS-CoV-2 infection in immunocompromised children and young people, a subset of the population in whom there is limited reported data. A secondary objective of this study is to describe patient/ parent anxiety regarding SARS-CoV-2 infection.

## METHODS

In this prospective cohort study, immunocompromised patients under 18 years were identified by the clinical teams at 46 hospitals across the UK (Supplementary Online

1  
2  
3 Appendix B). Children and young people were considered to be  
4 immunocompromised if they required an annual influenza vaccination due to their  
5 underlying condition or medication, following the immunisation against infectious  
6 disease UK government guidance [7].  
7  
8  
9

## 10 11 12 **Patient and Public Involvement** 13

14  
15 Study design included patient and public involvement (PPI). Parents of children on  
16 immunosuppressive drugs were asked about their willingness to participate in such a  
17 study and whether they had any specific questions or anxieties.  
18  
19

20  
21  
22 Parents and participants were sent age-appropriate patient information sheets and  
23 asked to complete an online consent form. If they did not reply after receiving  
24 electronic reminders in the following three weeks, they were removed from the study  
25 database. Following completion of online consent, participants were sent a weekly  
26 online questionnaire based on the International Severe Acute Respiratory and  
27 emerging Infections Consortium (ISARIC) and WHO COVID-19 Case Report Form  
28 [8], with questions also incorporating PPI feedback (Supplementary Online Appendix  
29 C: Weekly questionnaire). Depending on the age and ability of the child or young  
30 person, questionnaires were either completed by the participant or their parent or  
31 carer.  
32  
33  
34  
35  
36  
37  
38  
39

40  
41 From 16<sup>th</sup> March 2020, information was collected regarding symptom presentation,  
42 test results, NHS attendance, hospital admission and the effects of COVID-19 on  
43 daily life. Loss of smell or taste was added to the weekly questionnaire at week 14  
44 following emerging evidence for anosmia and ageusia in COVID-19 disease. Study  
45 participants were advised that the study did not replace normal healthcare provision  
46 and were asked to follow government guidance and seek medical advice via  
47 emergency health care providers or the child's normal clinical team if concerns about  
48 symptoms arose. The study team did not provide advice on SARS-CoV-2 testing.  
49 During the study period testing was limited to patients possibly needing admission in  
50 the UK (due to national testing capacity).  
51  
52  
53  
54  
55  
56  
57  
58  
59  
60



1  
2  
3 Study recruitment closed on 4<sup>th</sup> July 2020. Data collection is ongoing and follow up is  
4 planned to continue for 12 months. The study was approved by the Leeds NHS  
5 Research Ethics Committee (IRAS 281544).  
6  
7  
8  
9

## 10 **Statistical Analysis**

11  
12 Longitudinal data were collected as participants were asked to complete a weekly  
13 online questionnaire for one year. We report data up to the 4<sup>th</sup> July 2020, when  
14 lockdown restrictions in the UK were eased. All questionnaire data collected over this  
15 16 week study period were included in the analysis, although some participants did  
16 not complete the questionnaire every week. Participants who did not complete any  
17 questionnaires were not included in the analysis. Analysis assumed that the date of  
18 entry into the study was the date of the first completed questionnaire. Data were  
19 cleaned and analysed every week and a top level report provided to NHS  
20 England and the Royal College of Paediatrics and Child Health (RCPCH). The  
21 descriptive statistics presented in this paper were analysed using SAS9.4. Spearman  
22 correlation was used to analyse the correlation between anxiety scores and number  
23 of symptoms.  
24  
25  
26  
27  
28  
29  
30  
31  
32  
33

## 34 **RESULTS**

35  
36  
37 Recruitment increased over the 16 week study period (Figure 1). By week 16, 1490  
38 eligible patients or their parents had consented. Weekly online questionnaire  
39 response rate varied between 74% and 100% (Figure 1). The median age of  
40 participants was 11 years (range 0 – 18 years). 54.5% of participants were female.  
41 Baseline characteristics of participants are shown in Table 1. When participants had  
42 more than one diagnosis, the primary diagnosis is reported.  
43  
44  
45  
46  
47  
48  
49  
50  
51  
52  
53  
54  
55  
56  
57  
58  
59  
60

**Table 1: Baseline characteristics: primary diagnosis and medication**

|                                                | Male<br>n (%)      | Female<br>n (%)    | Total<br>n (%)     |
|------------------------------------------------|--------------------|--------------------|--------------------|
| <b>Primary diagnosis:</b>                      |                    |                    |                    |
| Juvenile idiopathic arthritis                  | 140 (20.6%)        | 314 (38.7%)        | 454 (30.5%)        |
| Other rheumatological diagnoses                | 48 (7.1%)          | 110 (13.6%)        | 158 (10.6%)        |
| Immunodeficiency disorders                     | 64 (9.4%)          | 53 (6.5%)          | 117 (7.9%)         |
| Solid organ or bone marrow transplant          | 53 (7.8%)          | 36 (4.4%)          | 89 (6.0%)          |
| Renal disease                                  | 56 (8.2%)          | 27 (3.3%)          | 83 (5.6%)          |
| Malignant haematology & oncological diagnoses  | 51 (7.5%)          | 28 (3.5%)          | 79 (5.3%)          |
| Airways disease                                | 29 (4.3%)          | 24 (3.0%)          | 53 (3.6%)          |
| Inflammatory bowel disease                     | 29 (4.3%)          | 23 (2.8%)          | 52 (3.5%)          |
| Diabetes                                       | 30 (4.4%)          | 19 (2.3%)          | 49 (3.3%)          |
| Neurological diagnoses                         | 20 (2.9%)          | 10 (1.2%)          | 30 (2.0%)          |
| Other gastroenterology & hepatology diagnoses  | 7 (1.0%)           | 12 (1.5%)          | 19 (1.3%)          |
| Other                                          | 26 (3.8%)          | 34 (4.2%)          | 60 (4.0%)          |
| Missing diagnosis                              | 126 (18.6%)        | 121 (14.9%)        | 247 (16.6%)        |
| <b>Total</b>                                   | <b>679 (45.6%)</b> | <b>811 (54.4%)</b> | <b>1490 (100%)</b> |
| <b>Medication:</b>                             |                    |                    |                    |
| Methotrexate                                   | 137 (20.2%)        | 249 (30.7%)        | 386 (25.9%)        |
| Anti-TNF therapy                               | 101 (14.9%)        | 202 (24.9%)        | 303 (20.3%)        |
| Corticosteroids                                | 134 (19.7%)        | 115 (14.2%)        | 249 (16.7%)        |
| Other antibiotics and antivirals               | 105 (15.5%)        | 63 (7.8%)          | 168 (11.3%)        |
| Calcineurin inhibitors                         | 87 (12.8%)         | 71 (8.8%)          | 158 (10.6%)        |
| Mycophenolate mofetil (MMF)                    | 64 (9.4%)          | 67 (8.3%)          | 131 (8.8%)         |
| Other disease modifying anti-rheumatic drugs   | 56 (8.2%)          | 53 (6.5%)          | 109 (7.3%)         |
| Inhalers                                       | 46 (6.8%)          | 40 (4.9%)          | 86 (5.8%)          |
| Insulin                                        | 46 (6.8%)          | 36 (4.4%)          | 82 (5.5%)          |
| Non-steroidal anti-inflammatory drugs (NSAIDs) | 21 (3.1%)          | 51 (6.3%)          | 72 (4.8%)          |
| Chemotherapy                                   | 41 (6.0%)          | 27 (3.3%)          | 68 (4.6%)          |
| Azithromycin                                   | 40 (5.9%)          | 28 (3.5%)          | 68 (4.6%)          |
| Hydroxychloroquine                             | 11 (1.6%)          | 44 (5.4%)          | 55 (3.7%)          |
| Tocilizumab                                    | 16 (2.4%)          | 33 (4.1%)          | 49 (3.3%)          |
| Intravenous or subcutaneous immunoglobulin     | 21 (3.1%)          | 17 (2.1%)          | 38 (2.6%)          |
| Other biologic drugs                           | 14 (2.1%)          | 22 (2.7%)          | 36 (2.4%)          |

1  
2  
3 Information regarding primary diagnosis was incomplete for 247 (16.6%)  
4 participants. Of 1368 participants who completed at least one weekly online  
5 questionnaire, 922 (67.4%) reported at least one symptom consistent with suspected  
6 SARS-CoV-2 infection over the study period. 476 (34.8%) reported 3 or more  
7 simultaneous symptoms. The most frequently reported symptoms included joint pain,  
8 fatigue, headache, nausea and muscle pain. Symptoms according to primary  
9 diagnosis and medication can be found in Supplementary Online Appendix D.  
10  
11  
12  
13  
14  
15  
16

17 Figure 2a depicts the relationship between cough, fever, sore throat and shortness of  
18 breath, with some degree of overlap between these symptoms. The frequency of  
19 cough, blocked nose and sore throat decreased in both airways and non-airways  
20 disease participants over the study period (Figure 2b and 2c). This trend was more  
21 marked in those with airways disease (Figure 2b).  
22  
23  
24  
25  
26

27 53 participants (3.9%) visited primary or secondary NHS care due to concerns about  
28 SARS-CoV-2 infection, of whom 47 (88.7%) reported symptoms. Two participants  
29 were admitted to hospital. 135 participants (9.9%) underwent a viral PCR test for  
30 SARS-CoV-2 infection. 110 of these reported symptoms. None of the study  
31 participants tested positive for SARS-CoV-2 infection. 137 participants had their  
32 medication suspended or changed during the study period, due to assumed risk of  
33 SARS-CoV-2 disease. Of these 117 (85.4%) reported symptoms.  
34  
35  
36  
37  
38  
39  
40

41 Figure 3a illustrates relatively static low school attendance over the 16 week study  
42 period, during which schools were closed to the majority of children. 62% of  
43 questionnaire respondents reported high levels of anxiety (scores of 7 to 10 out of  
44 10) at the start of the study, with anxiety levels remaining extremely high throughout  
45 (Figure 3b). With the easing of lockdown restrictions in July 2020, anxiety themes  
46 included concerns regarding the severity of SARS-CoV-2 infection, the re-opening of  
47 schools and a second wave of infection. The correlation between number of  
48 symptoms and anxiety was not significant using cross-sectional Spearman  
49 correlation.  
50  
51  
52  
53  
54  
55  
56  
57

## 58 **DISCUSSION**

59  
60

1  
2  
3 While 922 (67.4%) participants reported one or more symptoms consistent with  
4 suspected SARS-CoV-2 infection, of the 110 who underwent viral PCR testing, none  
5 tested positive for SARS-CoV-2, suggesting an absence of symptom specificity [2].  
6  
7 Symptoms of SARS-CoV-2 infection overlap with those of chronic disease  
8 exacerbations and medication side-effects. Joint pain was frequently reported,  
9  
10 reflecting the contribution of rheumatological diagnoses to the cohort. This suggests  
11 symptom-based screening for SARS-CoV-2 infection may not be helpful in these  
12 immunocompromised children and young people.  
13  
14  
15  
16  
17  
18

19 We are unable to comment on the incidence rate of SARS-CoV-2 infection in this  
20 cohort without comprehensive serological data. However, we can assume that only  
21 mild cases of SARS-CoV-2 infection were missed as none of these 'high risk'  
22 patients had severe enough SARS-CoV-2 infection requiring hospital admission.  
23  
24 This study period encompassed the peak in confirmed SARS-CoV-2 cases in the  
25 UK, during which time many immunocompromised children were shielding. Either  
26 shielding measures were effective, or similar to healthy children,  
27 immunocompromised children are less affected by SARS-CoV-2 infection than  
28 adults [9, 10].  
29  
30  
31  
32  
33  
34  
35

36 In the UK, of the 651 children with laboratory confirmed SARS-CoV-2, between 17<sup>th</sup>  
37 January and 3<sup>rd</sup> July 2020, only 48 (8%) had a haematological, oncological or  
38 immunological co-morbidity [11]. There was no significant difference in the  
39 presenting symptoms of the immunocompromised compared to the rest of the  
40 paediatric cohort (O. Swann, personal communication). Limited data for paediatric  
41 oncology, liver transplant, chronic kidney disease (CKD) and inflammatory bowel  
42 disease (IBD) patients is reassuring, with few cases of mostly mild infection reported  
43 [12-16]. While some adult patients on immunosuppressive biologics may not be at  
44 higher risk of severe disease [17], other analyses suggest that adults with  
45 malignancy, autoimmune conditions, asplenia and other immunosuppressive  
46 conditions are at greater risk of COVID-19 related death [18]. However, the  
47 contribution of co-morbidity to SARS-CoV-2 disease severity in children remains  
48 unclear due to the low prevalence of severe disease in this age group [19].  
49  
50  
51  
52  
53  
54  
55  
56  
57  
58  
59  
60

1  
2  
3 The frequency of cough, blocked nose and sore throat decreased in both airways  
4 and non-airways disease participants over the study period. This may suggest that  
5 shielding measures may have been effective in reducing the transmission of  
6 respiratory viruses in these children, similar to other studies [20]. However, this  
7 observation is unsupported by serological data.  
8  
9  
10  
11  
12

13 53 participants sought NHS attention and only two were admitted to hospital, in  
14 keeping with reports that the proportion of vulnerable paediatric inpatients has  
15 significantly decreased during the pandemic [21]. This implies that either families  
16 were successfully managing minor or chronic symptoms at home, or they were not  
17 accessing healthcare appropriately. A decrease in attendances to Paediatric  
18 Emergency Departments has been reported in the UK following the start of the  
19 pandemic [22]. While concerns were initially raised about delayed presentations of  
20 serious illness [23], a formal survey found this to be rare [24]. It may also be possible  
21 that the reduction in “normal” upper and lower respiratory infection transmission  
22 prevented by self-isolation and increased hand hygiene, during the lockdown period  
23 has had the indirect effect of also reducing other reported minor or chronic  
24 symptoms in this cohort.  
25  
26  
27  
28  
29  
30  
31  
32  
33  
34  
35

36 More than 50% of questionnaire respondents reported high levels of anxiety at the  
37 start of the study, similar to national figures [25]. However, anxiety scores remained  
38 extremely high during this study, whereas average anxiety scores nationally reduced  
39 from 5.2 to 4.0 out of 10 by May 2020 [25]. With the advice to stop shielding from  
40 31<sup>st</sup> July 2020, the planned re-opening of schools in September 2020 and  
41 uncertainty regarding a second wave of infection, these families require up-to-date,  
42 evidence-based guidance on the need for specific precautionary measures. If such  
43 evidence is not available, a holistic, child-centred approach must be taken by  
44 clinicians on a case by case basis [6].  
45  
46  
47  
48  
49  
50  
51  
52

53 Study limitations include patient or parent reported information, unverified by clinical  
54 review. Inconsistent completion of weekly questionnaires over the study period may  
55 have affected the data, although a median response rate of 83% (range 74% to  
56 100%) is high for a questionnaire study. Over-reporting of symptoms may have  
57 occurred particularly as anxiety levels were high. Under-reporting of symptoms may  
58  
59  
60

1  
2  
3 also have occurred due to the nature of the study, which required weekly  
4 participation. Only 110 out of 922 participants with symptoms underwent viral PCR  
5 testing, therefore some cases of mild SARS-CoV-2 infection may have been missed.  
6  
7 During the initial weeks of the outbreak, viral PCR tests were only performed if a  
8 child was admitted to hospital. Although all subspecialties in each hospital were  
9 approached to take part in the study, not all decided to participate. This may have  
10 caused bias in the composition of the cohort.  
11  
12  
13  
14  
15  
16

17 Information on SARS-CoV-2 prevalence, progression and outcomes in children is  
18 still limited, with the results of national surveillance programmes awaited. Whether  
19 children with pre-existing co-morbidities are more likely to contract SARS-CoV-2  
20 infection remains unclear. Further research is warranted to identify risk factors for  
21 severe infection in children and young people to aid health service planning, improve  
22 public health messaging and minimise unforeseen consequences of imposed  
23 restrictions on child health and wellbeing.  
24  
25  
26  
27  
28  
29

30 In conclusion, this is the first study to prospectively observe a cohort of  
31 immunocompromised paediatric patients during the COVID-19 pandemic. We report  
32 results from a large cohort of 1490 patients over 16 weeks. Although symptoms  
33 indicative of SARS-CoV-2 infection were common in this cohort of  
34 immunocompromised children and young people, none of these 'high risk' patients  
35 had severe SARS-CoV-2 infection requiring hospital admission. While this  
36 observation is reassuring, clinicians need to remain cautious when counselling  
37 families, as symptom-based screening to facilitate the early detection of SARS-CoV-  
38 2 infection may not be helpful. In addition these patients/parents remain very  
39 anxious, highlighting the pressing need to clearly define and communicate SARS-  
40 CoV-2 risk in children and young people.  
41  
42  
43  
44  
45  
46  
47  
48  
49  
50  
51  
52  
53  
54  
55  
56  
57  
58  
59  
60

1  
2  
3 **Contributorship statement:** RP, HdG and SF planned the study. RP, MS and HdG  
4 managed the study and contributed to all parts of the manuscript. LM managed the  
5 patient data. CD provided statistical analysis. AL, DG, DO, JL and SF contributed to  
6 managing the study and the writing, reviewing and editing of the manuscript. All  
7 members of the ImmunoCOVID group assisted with patient recruitment.  
8  
9  
10  
11  
12  
13  
14  
15  
16

17 **Acknowledgements:** We would like to acknowledge all the children, young people  
18 and parents participating in this study. This study was badged as a UK NIHR Urgent  
19 Public Health Study and we would also like to thank the NIHR Clinical Research  
20 Network (CRN) and all associated NIHR Local CRNs and site staff who supported  
21 recruitment.  
22  
23  
24  
25  
26

27 **Funding:** The study was funded by the British Paediatric Allergy Immunity and  
28 Infection Group (BPAIIG) and SNF's NIHR Senior Investigator Award. SNF, MS and  
29 DO are funded in part by the NIHR Southampton Clinical Research Facility. CD and  
30 JL are funded by NHS England for Highly Specialised Services (Primary Ciliary  
31 Dyskinesia Centre, University Hospital Southampton NHS Foundation Trust).  
32 Additional project management and information technology support was provided by  
33 the staff and resources of the NIHR Southampton Clinical Research Facility.  
34  
35  
36  
37  
38  
39  
40

41 **Ethics statement:** Parental consent has been obtained for all participants under the  
42 age of 16 years.  
43  
44  
45

46 **Competing interests:** All authors have completed the *ICMJE* uniform disclosure  
47 form at [www.icmje.org/coi\\_disclosure.pdf](http://www.icmje.org/coi_disclosure.pdf). HdG received grant funding from the  
48 BPAIIG for the submitted work; there are no other relationships or activities that  
49 could appear to have influenced the submitted work.  
50  
51  
52  
53  
54

55 **Dissemination declaration:** We plan to disseminate the results to study participants  
56 and their parents.  
57  
58  
59  
60



1  
2  
3 **Data sharing statement:** Research data may be made available upon reasonable  
4 request, wherever legally and ethically possible.  
5  
6  
7

8  
9 **Transparency declaration:** The Corresponding Author affirms that the manuscript  
10 is an honest, accurate and transparent account of the study being reported. No  
11 important aspects of the study have been omitted. Any discrepancies from the study  
12 as planned have been explained.  
13  
14  
15

16  
17  
18 **Exclusive License Statement:** The Corresponding Author has the right to grant on  
19 behalf of all authors and does grant on behalf of all authors, [a worldwide licence](#) to  
20 the Publishers and its licensees in perpetuity, in all forms, formats and media  
21 (whether known now or created in the future), to i) publish, reproduce, distribute,  
22 display and store the Contribution, ii) translate the Contribution into other languages,  
23 create adaptations, reprints, include within collections and create summaries,  
24 extracts and/or, abstracts of the Contribution, iii) create any other derivative work(s)  
25 based on the Contribution, iv) to exploit all subsidiary rights in the Contribution, v) the  
26 inclusion of electronic links from the Contribution to third party material where-ever it  
27 may be located; and, vi) licence any third party to do any or all of the above.  
28  
29  
30  
31  
32  
33  
34  
35  
36  
37  
38  
39  
40  
41  
42  
43  
44  
45  
46  
47  
48  
49  
50  
51  
52  
53  
54  
55  
56  
57  
58  
59  
60



1  
2  
3 **Figure 1: Study recruitment and weekly questionnaire response rate**  
4  
5

6 **Figure 2a: Venn diagram depicting the association between fever, cough,**  
7 **shortness of breath and sore throat during the study period**  
8  
9

10  
11 **Figure 2b: Reported symptoms in airways disease patients over time**  
12  
13

14  
15 **Figure 2c: Reported symptoms in non-airways disease patients over time**  
16  
17

18 **Figure 3a: Reported school attendance over time**  
19  
20

21  
22 **Figure 3b: Reported anxiety levels over time**  
23

24 Anxiety scores out of 10 categorised into mild (1 to 3), moderate (4 to 6) and severe  
25 (7 to 10) anxiety, with a score of 0 indicating no anxiety.  
26  
27  
28  
29  
30  
31  
32  
33  
34  
35  
36  
37  
38  
39  
40  
41  
42  
43  
44  
45  
46  
47  
48  
49  
50  
51  
52  
53  
54  
55  
56  
57  
58  
59  
60

## REFERENCES

- 1 <https://covid19.who.int/region/euro/country/gb> (accessed August 2020)
- 2 Assaker R, Colas A-E, Julien-Marsollier F, et al. Presenting symptoms of COVID-19 in children: a meta-analysis of published studies. *Br J Anaesth* 2020.  
3 [https://bjanaesthesia.org/article/S0007-0912\(20\)30408-6/abstract](https://bjanaesthesia.org/article/S0007-0912(20)30408-6/abstract) (accessed July 2020).
- 4 Wu Z, McGoogan JM. Characteristics of and Important Lessons From the Coronavirus Disease 2019 (COVID-19) Outbreak in China: Summary of a Report of 72 314 Cases From the Chinese Center for Disease Control and Prevention. *JAMA* 2020;323(13):1239–42.
- 5 Ladhani SN, Amin-Chowdhury Z, Amirthalingam G, et al. Prioritising paediatric surveillance during the COVID-19 pandemic. *Arch Dis Child* 2020;105(7):613–5.
- 6 <https://www.gov.uk/government/publications/guidance-on-shielding-and-protecting-extremely-vulnerable-persons-from-covid-19/covid-19-guidance-for-young-people-on-shielding-and-protecting-people-most-likely-to-become-unwell-if-they-catch-coronavirus> (accessed July 2020).
- 7 COVID-19 rapid guideline: children and young people who are immunocompromised. NICE guideline [NG174]. 2020.  
8 <https://www.nice.org.uk/guidance/ng174> (accessed July 2020).
- 9 [https://assets.publishing.service.gov.uk/government/uploads/system/uploads/attachment\\_data/file/931139/Green\\_book\\_chapter\\_19\\_influenza\\_V7\\_OCT\\_2020.pdf](https://assets.publishing.service.gov.uk/government/uploads/system/uploads/attachment_data/file/931139/Green_book_chapter_19_influenza_V7_OCT_2020.pdf) (accessed December 2020).
- 10 <https://isaric.tghn.org/COVID-19-CRF/> (accessed July 2020).

1  
2  
3 9 Mehta NS, Mytton OT, Mullins EWS, et al. SARS-CoV-2 (COVID-19): What do we  
4 know about children? A systematic review. *Clin Infect Dis* 2020.

5  
6 <https://academic.oup.com/cid/article/doi/10.1093/cid/ciaa556/5835843> (accessed  
7  
8 July 2020).

9  
10  
11 10 Vicent MG, Martinez AP, Trabazo del Castillo M, et al. COVID-19 in pediatric  
12 hematopoietic stem cell transplantation: The experience of Spanish Group of  
13 Transplant (GETMON/GETH). *Pediatr Blood Cancer* 2020.

14  
15  
16 <https://www.ncbi.nlm.nih.gov/pmc/articles/PMC7361142/> (accessed December  
17  
18 2020).

19  
20  
21 11 Swann OV, Holden, KA, Turtle L, et al. Clinical characteristics of children and  
22 young people admitted to hospital with covid-19 in United Kingdom: prospective  
23 multicentre observational cohort study. *BMJ* 2020;**370**:m3249.

24  
25  
26 12 Ferrari A, Zecca M, Rizzari C, et al. Children with cancer in the time of COVID-19:  
27 An 8-week report from the six pediatric onco-hematology centers in Lombardia, Italy.  
28 *Pediatr Blood Cancer* 2020;67(8):e28410.

29  
30  
31 13 Millen GC, Arnold R, Cazier JB, et al. Severity of COVID-19 in children with cancer:  
32 Report from the United Kingdom Paediatric Coronavirus Cancer Monitoring  
33 Project. *Br J Cancer* 2020.

34  
35  
36 <https://doi.org/10.1038/s41416-020-01181-0> (accessed December 2020).

37  
38  
39 14 D'Antiga L. Coronaviruses and Immunosuppressed Patients: The Facts During  
40 the Third Epidemic. *Liver Transpl* 2020;26(6):832–4.

41  
42  
43 15 Turner D, Huang Y, Martín-de-Carpi J, et al. Corona Virus Disease 2019 and  
44 Paediatric Inflammatory Bowel Diseases: Global Experience and Provisional  
45 Guidance (March 2020) from the Paediatric IBD Porto Group of European Society of  
46 Paediatric Gastroenterology, Hepatology, and Nutrition. *J Pediatr Gastroenterol Nutr*  
47 2020;70(6):727–33.

1  
2  
3 16 Plumb L, Benoy-Deeney F, Casula A et al. COVID-19 in children with chronic  
4 kidney disease: findings from the UK renal registry. *Arch Dis Child* 2020.  
5 <https://adc.bmj.com/content/early/2020/07/24/archdischild-2020-319903> (accessed  
6 July 2020).  
7  
8  
9

10  
11 17 Fung M, Babik JM. COVID-19 in Immunocompromised Hosts: What We Know So  
12 Far. *Clin Infect Dis* 2020. <https://doi.org/10.1093/cid/ciaa863> (accessed December  
13 2020).  
14  
15  
16

17  
18 18 Williamson EJ, Walker AJ, Bhaskaran K, et al. Factors associated with COVID-  
19 19-related death using OpenSAFELY. *Nature* 2020; **584**: 430–436.  
20  
21  
22

23  
24 19 Docherty AB, Harrison EM, Green CA, et al. Features of 20 133 UK patients in  
25 hospital with covid-19 using the ISARIC WHO Clinical Characterisation Protocol:  
26 prospective observational cohort study. *BMJ* 2020;369:m1985.  
27  
28  
29

30  
31 20 Chan KH, Lee P, Chan CY, et al. Monitoring respiratory infections in covid-19  
32 epidemics. *BMJ* 2020;369:m1628.  
33  
34  
35

36  
37 21 Issitt R, Booth J, Bryant W, et al. Coronavirus (COVID-19) infection in children at  
38 a specialist centre: outcome and implications of underlying high-risk comorbidities in  
39 a paediatric population. *medRxiv* 2020.05.20.  
40  
41  
42

43  
44 22 Isba R, Edge R, Jenner R, et al. Where have all the children gone? Decreases in  
45 paediatric emergency department attendances at the start of the COVID-19  
46 pandemic of 2020. *Arch Dis Child* 2020;105(7):704–704.  
47  
48  
49

50  
51 23 Lynn RM, Avis JL, Lenton S, et al. Delayed access to care and late presentations  
52 in children during the COVID-19 pandemic: a snapshot survey of 4075 paediatricians  
53 in the UK and Ireland. *Arch Dis Child* 2020.  
54 <https://adc.bmj.com/content/early/2020/06/24/archdischild-2020-319848> (accessed  
55 July 2020).  
56  
57  
58  
59  
60

1  
2  
3 24 Roland D, Harwood R, Bishop N, et al. Children's emergency presentations  
4 during the COVID-19 pandemic. *Lancet Child Adolesc Health* 2020;4(8):e32–3.  
5  
6  
7

8 25 Coronavirus (COVID-19) Infection Survey pilot - Office for National Statistics.  
9 [https://www.ons.gov.uk/peoplepopulationandcommunity/healthandsocialcare/conditio](https://www.ons.gov.uk/peoplepopulationandcommunity/healthandsocialcare/conditionsanddiseases/bulletins/coronaviruscovid19infectionsurveysurvey/latest#incidence-rate)  
10 [nsanddiseases/bulletins/coronaviruscovid19infectionsurveysurvey/latest#incidence-rate](https://www.ons.gov.uk/peoplepopulationandcommunity/healthandsocialcare/conditionsanddiseases/bulletins/coronaviruscovid19infectionsurveysurvey/latest#incidence-rate)  
11 [nsanddiseases/bulletins/coronaviruscovid19infectionsurveysurvey/latest#incidence-rate](https://www.ons.gov.uk/peoplepopulationandcommunity/healthandsocialcare/conditionsanddiseases/bulletins/coronaviruscovid19infectionsurveysurvey/latest#incidence-rate)  
12 (accessed July 2020).  
13  
14  
15  
16  
17  
18  
19  
20  
21  
22  
23  
24  
25  
26  
27  
28  
29  
30  
31  
32  
33  
34  
35  
36  
37  
38  
39  
40  
41  
42  
43  
44  
45  
46  
47  
48  
49  
50  
51  
52  
53  
54  
55  
56  
57  
58  
59  
60

1  
2  
3  
4  
5  
6  
7  
8  
9  
10  
11  
12  
13  
14  
15  
16  
17  
18  
19  
20  
21  
22  
23  
24  
25  
26  
27  
28  
29  
30  
31  
32  
33  
34  
35  
36  
37  
38  
39  
40  
41  
42  
43  
44  
45  
46  
47  
48  
49  
50  
51  
52  
53  
54  
55  
56  
57  
58  
59  
60

For peer review only

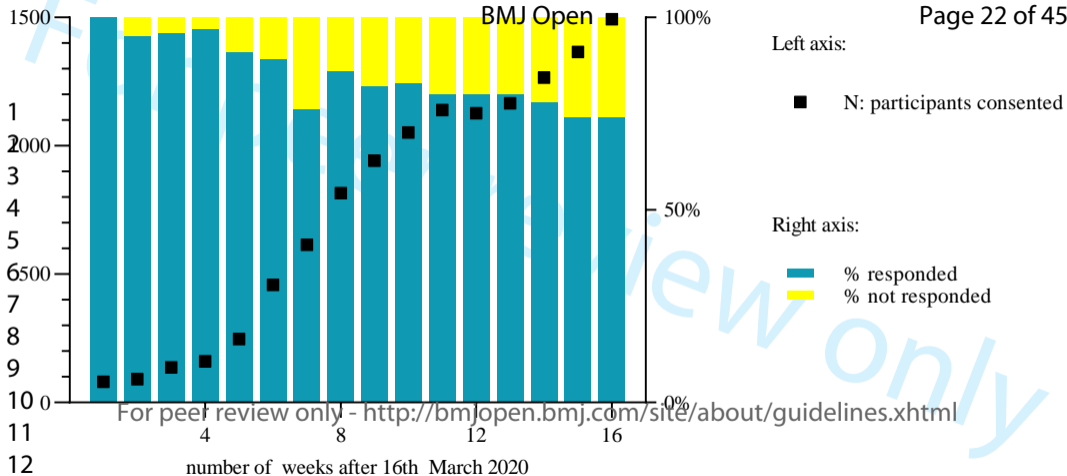

Fig 2a

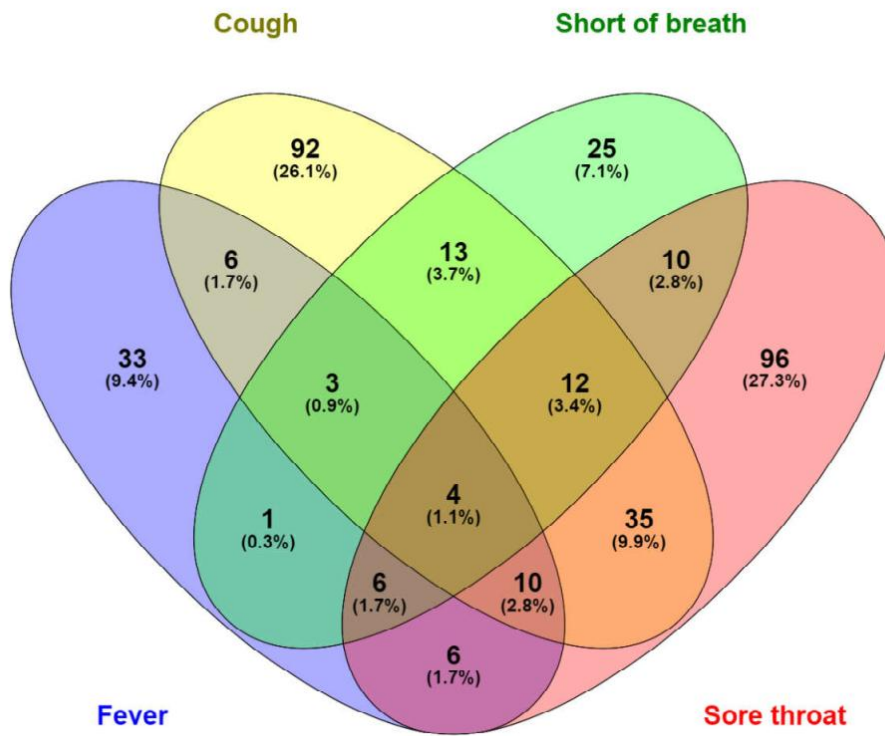

Fig 2b

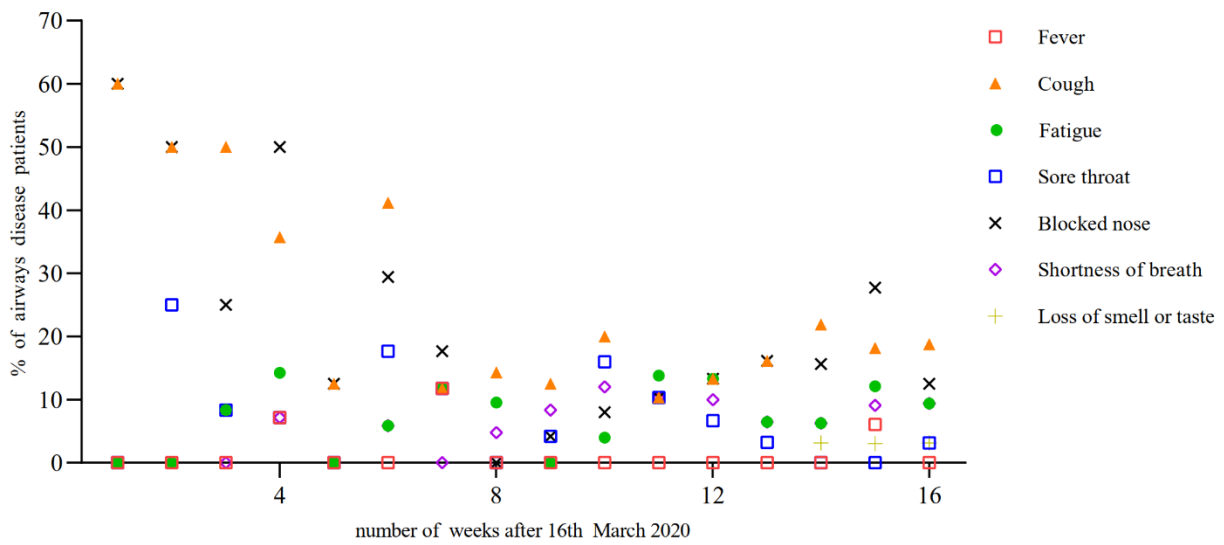

Fig 2c

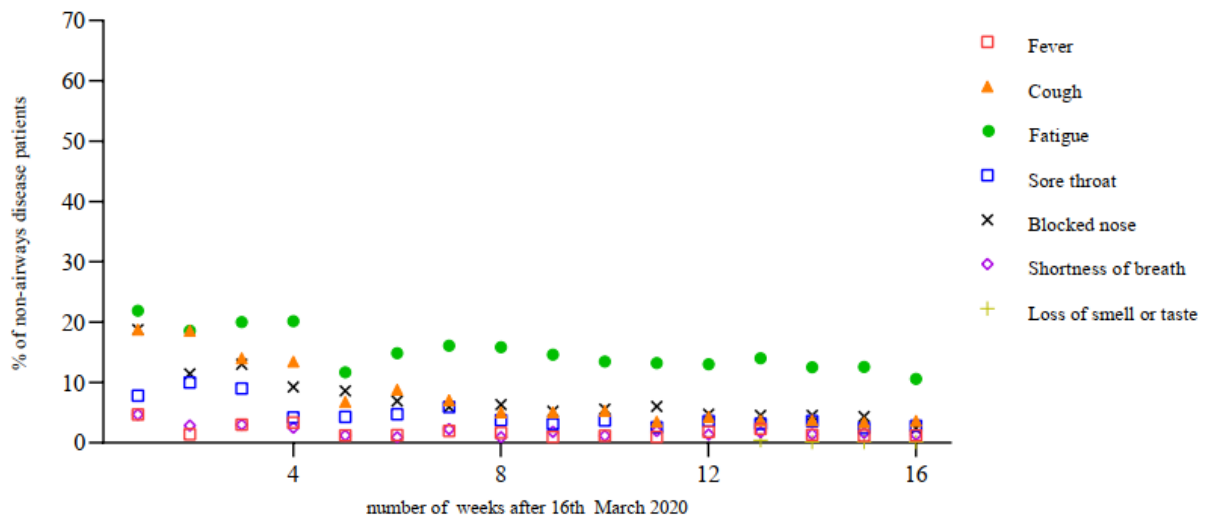



Fig 3a

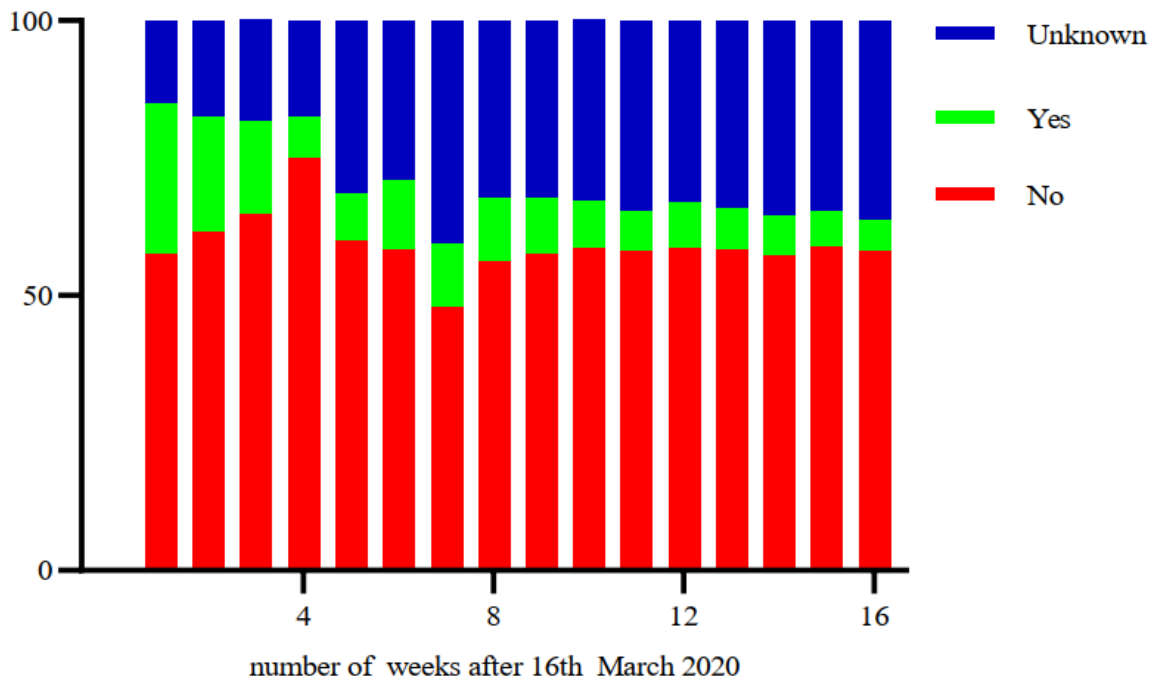

Fig 3b

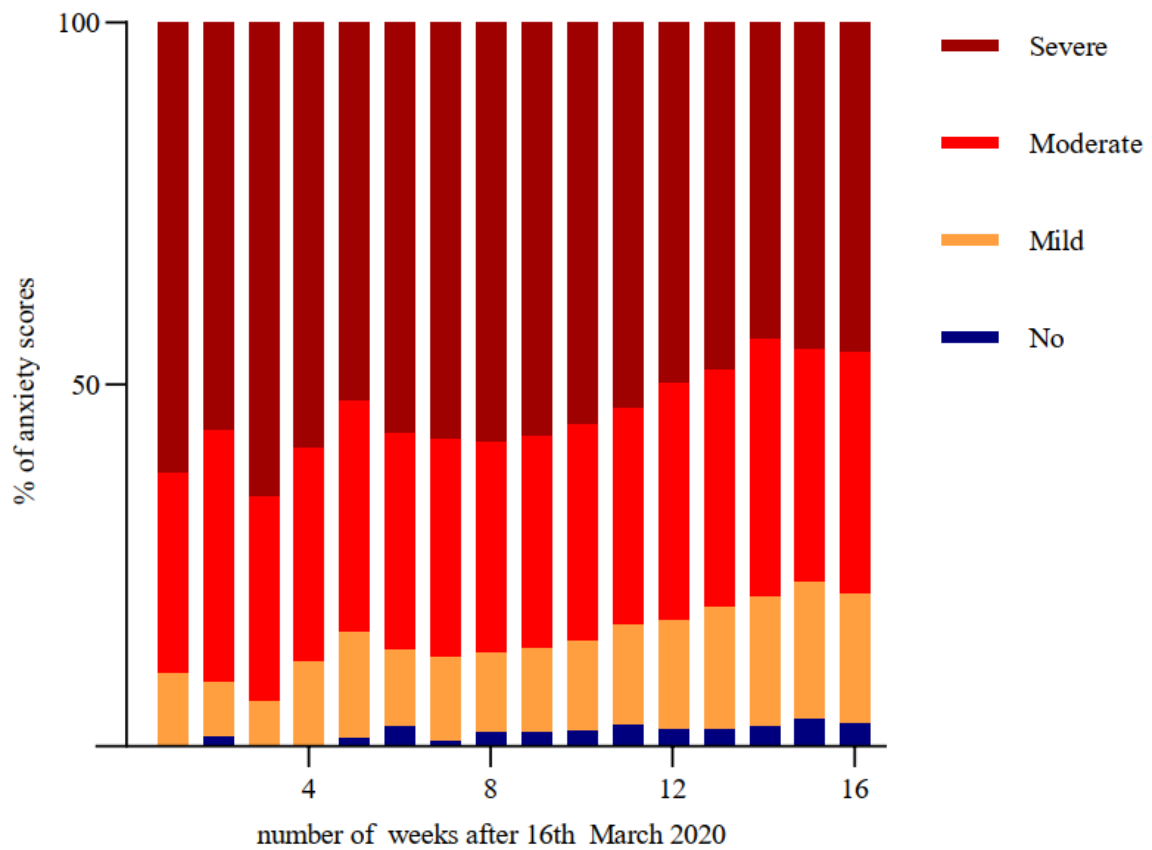

## Appendix A: List of ImmunoCOVID19 Study Group Co-authors

|      |                         |                                                      |                                                                                                                                                                            |                                                                                                                  |
|------|-------------------------|------------------------------------------------------|----------------------------------------------------------------------------------------------------------------------------------------------------------------------------|------------------------------------------------------------------------------------------------------------------|
| Dr   | Hesham Abdalla          | Consultant Paediatrician                             | Walsall Healthcare NHS Trust                                                                                                                                               | Moat Road, Walsall WS2 9PA                                                                                       |
| Ms   | Daniella Adams          | Clinical Nurse Specialist<br>Paediatric Rheumatology | Evelina London Children's Hospital, Guy's and St Thomas' NHS Foundation Trust                                                                                              | Westminster Bridge Road London, SE1 7EH                                                                          |
| Dr   | Nadeem A Afzal          | Consultant Paediatric Gastroenterologist             | Department of Paediatric Gastroenterology, Southampton Children's Hospital                                                                                                 | Tremona Road, Southampton, SO16 6YD                                                                              |
| Mr   | Nicolas Aldridge        | Lead Nurse R and D                                   | Birmingham Women's and Children's Hospital and University Hospital Coventry and Warwickshire                                                                               | 2nd Floor, PRI suit, UHCW, Clifford Bridge Road, CV2 2DX                                                         |
| Dr   | Paola Angelini          | Consultant Paediatric Oncology                       | Royal Marsden Hospital                                                                                                                                                     | Downs Road, Sutton, SM2 7HE                                                                                      |
| Dr   | Kate Armon              | Paediatric Rheumatologist                            | Paediatric Department, Addenbrookes hospital, Cambridge                                                                                                                    | Box 267 Children's Services, Biomedical Campus, hills Road, Cambridge Cb2 0QQ                                    |
| Dr   | James Ashton            | Clinical Research Fellow in Paediatric IBD           | Human Genetics and Genomic Medicine, University of Southampton, Department of Paediatric Gastroenterology, Southampton Children's Hospital                                 | Tremona Road, Southampton, SO16 6YD                                                                              |
| Mrs  | Helen Baker             | Data Manager                                         | Paediatric Oncology and Haematology, Cambridge University Hospitals NHS Foundation Trust                                                                                   | Hills Road, Cambridge, CB2 0QQ                                                                                   |
| Mrs  | Nicola Balatoni         | Research Nurse                                       | Leeds Children Hospital                                                                                                                                                    | Leeds Teaching Hospital NHS Trust, Great George Street, LS1 3EX                                                  |
| Dr   | Jed Bamber              | Consultant Paediatrician                             | NHS Dumfries and Galloway                                                                                                                                                  | Dumfries & Galloway Royal Infirmary, Cargenbridge, Dumfries, DG2 8RX                                             |
| Mrs  | Alison Barratt          | Paediatric Clinical Research Nurse                   | Royal United Hospitals Bath NHS Foundation Trust                                                                                                                           | Combe Park, Bath, BA1 3NG                                                                                        |
| Mrs  | Charlene Bass-Woodcock  | Paediatric Rheumatology Clinical Nurse Specialist    | Bradford Teaching Hospitals NHS Foundation Trust                                                                                                                           | Duckworth Lane, Bradford, West Yorkshire, BD9 6RJ                                                                |
| Dr   | Jessica Bate            | Consultant Paediatric Oncology                       | Department of Paediatric Oncology, University Hospital Southampton NHS Foundation Trust                                                                                    | Tremona Road, Southampton, SO16 6YD                                                                              |
| Dr   | Akshay Batra            | Consultant Paediatric Gastroenterologist             | Department of Paediatric Gastroenterology, Southampton Children's Hospital                                                                                                 | Tremona Road, Southampton, SO16 6YD                                                                              |
| Prof | R Mark Beattie          | Consultant Paediatric Gastroenterologist             | Department of Paediatric Gastroenterology, Southampton Children's Hospital                                                                                                 | Tremona Road, Southampton, SO16 6YD                                                                              |
| Dr   | Rumena Begum            | Research Coordinator                                 | Great Ormond Street Hospital for Children NHS Foundation Trust                                                                                                             | Great Ormond Street, London WC1N 3JH                                                                             |
| Miss | Claire Bell             | Paediatric Research Nurse                            | University Hospital Crosshouse                                                                                                                                             | Kilmarnock, KA2 0BE                                                                                              |
| Ms   | Kathryn Bell            | Research Nurse                                       | Great North Children's Hospital                                                                                                                                            | Royal Victoria Infirmary, Newcastle upon Tyne, NE1 4LP                                                           |
| Dr   | Georgina Bird-Lieberman | Paediatric Neurology Consultant                      | University Hospital Southampton NHS Foundation Trust                                                                                                                       | Tremona Road, Southampton, SO16 6YD                                                                              |
| Ms   | Helen Blackburn         | Research and Innovation Manager                      | Royal Manchester Children's Hospital, Manchester University Hospitals NHS Trust,                                                                                           | Royal Manchester Children's Hospital, Manchester University Hospitals NHS Trust, Oxford Rd Manchester M13 9WL UK |
| Dr   | Mary Brennan            | Consultant Paediatric Rheumatologist                 | Royal Hospital for Sick Children, Edinburgh                                                                                                                                | 9 Sciennes Road, Edinburgh, EH1 9LF                                                                              |
| Ms   | Francesca Brewer        | Research sister : Paediatrics and Neonates           | Birmingham Women's and Children's Hospital and University Hospital Coventry and Warwickshire                                                                               | R&D Clinical Trials Office, 3rd Floor, West wing, UHCW, Clifford Bridge, CV2 2DX                                 |
| Mrs  | Marlene Brito           | Clinical Trials Assistant                            | Department of Paediatric Oncology, University Hospital Southampton NHS Foundation Trust and Faculty of Medicine and Institute for Life Sciences, University of Southampton | Tremona Road, Southampton, SO16 6YD                                                                              |
| Dr   | Richard Brough          | Consultant urologist and urological cancer lead      | The Shrewsbury and Telford Hospital NHS Trust                                                                                                                              | Mytton Oak Road, Shrewsbury, Shropshire, SY3 8XQ                                                                 |

|    |      |                      |                                                                  |                                                                                                                                                                                                                                        |                                                                                |
|----|------|----------------------|------------------------------------------------------------------|----------------------------------------------------------------------------------------------------------------------------------------------------------------------------------------------------------------------------------------|--------------------------------------------------------------------------------|
| 1  | Dr   | Susan Byrne          | Paediatric Neurology Consultant                                  | Evelina London Children' Hospital                                                                                                                                                                                                      | Westminster Bridge Road, London, SE1 7EH                                       |
| 2  |      |                      | Consultant General Paediatrics and Paediatric Research           |                                                                                                                                                                                                                                        |                                                                                |
| 3  | Dr   | Katrina Cathie       |                                                                  | University Hospital Southampton NHS Foundation Trust                                                                                                                                                                                   | Tremona Road, Southampton, SO16 6YD                                            |
| 4  | Dr   | John Chapman         | Consultant Paediatrician                                         | James Paget University Hospital                                                                                                                                                                                                        | Lowestoft Rd, Gorleston, NR31 6LA                                              |
| 5  |      |                      | Consultant Paediatric Neurologist                                |                                                                                                                                                                                                                                        |                                                                                |
| 6  | Dr   | Anne-Marie Child     |                                                                  | Leeds Children Hospital                                                                                                                                                                                                                | Leeds Teaching Hospital NHS Trust, Great George Street, LS1 3EX                |
| 7  | Dr   | Coziana Ciurtin      | Consultant Adolescent Rheumatology                               | Centre for Adolescent Rheumatology Versus Arthritis, University College London                                                                                                                                                         | 3rd Floor Central, 250 Euston Road, London, NW1 2PG                            |
| 8  | Dr   | Sheila Clark         | Consultant dermatology                                           | Leeds Children Hospital                                                                                                                                                                                                                | Leeds Teaching Hospital NHS Trust, Great George Street, LS1 3EX                |
| 9  |      |                      | Consultant Paediatric Gastroenterologist                         | Department of Paediatric Gastroenterology, Southampton Children's Hospital                                                                                                                                                             |                                                                                |
| 10 | Dr   | Tracy Coelho         |                                                                  |                                                                                                                                                                                                                                        | Tremona Road, Southampton, SO16 6YD                                            |
| 11 | Dr   | William Coles        | Consultant Paediatric Rheumatologist                             | Birmingham Women's and Children's Hospital and University Hospital Coventry and Warwickshire                                                                                                                                           | Paediatric Rheumatology, Paediatric Department, UHCW, Clifford Bridge, CV2 2DX |
| 12 |      |                      | Research Nurse                                                   |                                                                                                                                                                                                                                        |                                                                                |
| 13 | Mrs  | Heather Collier      |                                                                  | East Lancs NHS Trust                                                                                                                                                                                                                   | Haslingden Road, Blackburn, BB2 3HH                                            |
| 14 | Dr   | Gary Connett         | Paediatric Respiratory Consultant                                | University Hospital Southampton NHS Foundation Trust                                                                                                                                                                                   | Tremona Road, Southampton, SO16 6YD                                            |
| 15 |      |                      | Consultant Paediatric Haematology                                |                                                                                                                                                                                                                                        |                                                                                |
| 16 | Dr   | Philip Connor        |                                                                  | Noah's Ark Children's Hospital For Wales                                                                                                                                                                                               | Rm 1F31 Cardigan House, UHW, Cardiff, CF14 4XW                                 |
| 17 | Dr   | Michael Cosgrove     | Consultant Paediatric Gastroenterologist                         | Morrison Hospital, Swansea Bay University Health Board                                                                                                                                                                                 | Swansea, SA6 6NL                                                               |
| 18 |      |                      | Clinical Nurse Specialist                                        |                                                                                                                                                                                                                                        |                                                                                |
| 19 | Ms   | Gillian Coyle        |                                                                  | Royal Hospital for Sick Children, Edinburgh                                                                                                                                                                                            | 9 Sciennes Road, Edinburgh, EH1 9LF                                            |
| 20 | Dr   | Brian Davidson       | Consultant Rheumatologist                                        | University Hospital Southampton NHS Foundation Trust                                                                                                                                                                                   | Tremona Road, Southampton, SO16 6YD                                            |
| 21 |      |                      | Data Manager                                                     | Department of Neonatal Medicine, University Hospital Southampton NHS Foundation Trust                                                                                                                                                  |                                                                                |
| 22 | Mrs  | Matthew Davies       |                                                                  |                                                                                                                                                                                                                                        |                                                                                |
| 23 | Mrs  | Sharon Davies-Dear   | Clinical Trials Project Manager                                  | R&D, University Hospital Southampton NHS Foundation Trust                                                                                                                                                                              | Tremona Road, Southampton, SO16 6YD                                            |
| 24 |      |                      | Consultant Paediatric Neurologist                                |                                                                                                                                                                                                                                        |                                                                                |
| 25 | Dr   | Christian De Goede   |                                                                  | Department of Child Health, Lancashire Teaching Hospitals NHS Trusts                                                                                                                                                                   | Royal Preston Hospital, Sharoe Green Lane, Preston PR2 9HT                     |
| 26 | Dr   | Hans de Graaf        | Consultant Paediatric Rheumatology                               | NIHR Southampton Clinical Research Facility and Paediatric Medicine, University Hospital Southampton NHS Foundation Trust                                                                                                              | Tremona Road, Southampton, SO16 6YD                                            |
| 27 |      |                      | Consultant Paediatric and Adolescent rheumatology                |                                                                                                                                                                                                                                        |                                                                                |
| 28 | Dr   | Samundeeswari Deepak |                                                                  | Nottingham Children's Hospital, Queen's Medical Centre, Nottingham University Hospitals NHS Trust                                                                                                                                      | Derby Road, Nottingham, NG72UH                                                 |
| 29 |      |                      | CLUSTER Research Coordinator                                     | Infection, Immunity and Inflammation Research & Teaching Department, University College London Great Ormond Street Institute of Child Health                                                                                           |                                                                                |
| 30 | Mr   | Fatjon Dekaj         |                                                                  |                                                                                                                                                                                                                                        | 30 Guilford Street, London, WC1N 1EH                                           |
| 31 |      |                      | Paediatric Research Nurse                                        |                                                                                                                                                                                                                                        |                                                                                |
| 32 | Miss | Sarah Diment         |                                                                  | Salisbury District Hospital                                                                                                                                                                                                            | Salisbury, Wiltshire, SP2 8BJ                                                  |
| 33 |      |                      | Research Fellow                                                  | University of Southampton, Faculty of Medicine, Clinical and Experimental Sciences                                                                                                                                                     |                                                                                |
| 34 | Dr   | Corine Driessens     |                                                                  |                                                                                                                                                                                                                                        | Tremona Road, Southampton, SO16 6YD                                            |
| 35 |      |                      | Consultant in Paediatric Infectious Diseases and Immunology      | Paediatric Infectious Diseases Research Group, St George's, University of London and St George's University Hospitals NHS Foundation Trust                                                                                             |                                                                                |
| 36 | Dr   | Simon B Drysdale     |                                                                  |                                                                                                                                                                                                                                        | Cranmer Terrace, London, SW17 0RE                                              |
| 37 |      |                      | Consultant paediatric Oncology                                   |                                                                                                                                                                                                                                        |                                                                                |
| 38 | Dr   | Martin Elliott       |                                                                  | Leeds Children Hospital                                                                                                                                                                                                                | Leeds Teaching Hospital NHS Trust, Great George Street, LS1 3EX                |
| 39 |      |                      | Consultant Paediatric Infectious Diseases & Immunology, Honorary | Newcastle Hospitals NHS Foundation Trust; Translational and Clinical Research Institute, Newcastle University, and NIHR Newcastle Biomedical Research Centre based at Newcastle upon Tyne Hospitals NHS Trust and Newcastle University |                                                                                |
| 40 | Prof | Marieke Emonts       |                                                                  |                                                                                                                                                                                                                                        | Royal Victoria Hospital, Queen Victoria Road, Newcastle upon Tyne. NE1 4LP     |

|    |      |                                          |                                                                           |                                                                                                                                                                                                                                      |                                                                                                         |
|----|------|------------------------------------------|---------------------------------------------------------------------------|--------------------------------------------------------------------------------------------------------------------------------------------------------------------------------------------------------------------------------------|---------------------------------------------------------------------------------------------------------|
|    |      | Professor Paediatric Infectious Diseases |                                                                           |                                                                                                                                                                                                                                      |                                                                                                         |
| 1  |      |                                          |                                                                           |                                                                                                                                                                                                                                      |                                                                                                         |
| 2  | Dr   | Mich Erlewyn-Lajeunesse                  | Consultant Paediatric Allergy and Immunology                              | University Hospital Southampton NHS Foundation Trust                                                                                                                                                                                 | Tremona Road, Southampton, SO16 6YD                                                                     |
| 3  |      |                                          |                                                                           |                                                                                                                                                                                                                                      |                                                                                                         |
| 4  | Dr   | Hazel Evans                              | Paediatric Respiratory Consultant                                         | University Hospital Southampton NHS Foundation Trust                                                                                                                                                                                 | Tremona Road, Southampton, SO16 6YD                                                                     |
| 5  | Mrs  | Tracey Farnon                            | Paediatric Consultant                                                     | Salisbury District Hospital                                                                                                                                                                                                          | Salisbury, Wiltshire, SP2 8BJ                                                                           |
| 6  |      |                                          |                                                                           |                                                                                                                                                                                                                                      |                                                                                                         |
| 7  | Prof | Saul Faust                               | Professor of Paediatric Immunology and Infectious Diseases                | NIHR Southampton Clinical Research Facility and NIHR Southampton Biomedical Research Centre, University Hospital Southampton NHS Foundation Trust and Faculty of Medicine and Institute for Life Sciences, University of Southampton | Tremona Road, Southampton, SO16 6YD                                                                     |
| 8  |      |                                          |                                                                           |                                                                                                                                                                                                                                      |                                                                                                         |
| 9  | Dr   | Susanna Felsenstein                      | Consultant Paediatric Infectious Diseases                                 | Alder Hey Children's Hospital                                                                                                                                                                                                        | Liverpool, East Prescott Rd L14 5AB                                                                     |
| 10 |      |                                          |                                                                           |                                                                                                                                                                                                                                      |                                                                                                         |
| 11 | Ms   | Lynsey Felton                            | Paediatric Research Nurse                                                 | James Paget University Hospital                                                                                                                                                                                                      | Lowestoft Rd, Gorleston, NR31 6LA                                                                       |
| 12 | Dr   | Matthew Fenton                           | Consultant Paediatric Cardiologist                                        | Great Ormond Street Hospital for Children NHS Foundation Trust                                                                                                                                                                       | Great Ormond Street, London WC1N 3JH                                                                    |
| 13 |      |                                          |                                                                           |                                                                                                                                                                                                                                      |                                                                                                         |
| 14 | Dr   | Katy Fidler                              | Clinical Senior Lecturer in Paediatric Infectious Diseases and Immunology | Academic Dept of Paediatrics, Brighton and Sussex Medical School, University of Sussex                                                                                                                                               | N - S Rd, Falmer, Brighton BN1 9PX                                                                      |
| 15 |      |                                          |                                                                           |                                                                                                                                                                                                                                      |                                                                                                         |
| 16 | Mrs  | Debbie Fisher                            | Trial Coordinator                                                         | Paediatric Oncology and Haematology, Cambridge University Hospitals NHS Foundation Trust                                                                                                                                             | Hills Road, Cambridge, CB2 0QQ                                                                          |
| 17 | Dr   | Peter W Fowlie                           | Consultant Paediatrician                                                  | Ninewells Hospital and Medical School                                                                                                                                                                                                | Dundee, DD1 9SY                                                                                         |
| 18 |      |                                          |                                                                           |                                                                                                                                                                                                                                      |                                                                                                         |
| 19 | Mrs  | Kirsty Galvin                            | Lead Nurse                                                                | Children's Community Nursing Team, Kent community Health Foundation Trust                                                                                                                                                            | Trinity House, 110-12- Upper Pemberton, Kennington, Ashford, Kent, TN25 4AZ                             |
| 20 |      |                                          |                                                                           |                                                                                                                                                                                                                                      |                                                                                                         |
| 21 | Ms   | Emma Gardiner                            | Research Nurse                                                            | University Hospital Lewisham                                                                                                                                                                                                         | Paediatric Offices, Nockold House, University Hospital Lewisham, Lewisham High street, London, SE13 6LH |
| 22 |      |                                          |                                                                           |                                                                                                                                                                                                                                      |                                                                                                         |
| 23 | Dr   | Edward Gaynor                            | Paediatric Gastroenterology Consultant                                    | Great Ormond Street Hospital for Children NHS Foundation Trust                                                                                                                                                                       | Great Ormond Street, London WC1N 3JH                                                                    |
| 24 |      |                                          |                                                                           |                                                                                                                                                                                                                                      |                                                                                                         |
| 25 | Dr   | Diane Gbesemete                          | Clinical Research Fellow                                                  | NIHR Southampton Clinical Research Facility and NIHR Southampton Biomedical Research Centre, University Hospital Southampton NHS Foundation Trust and Faculty of Medicine and Institute for Life Sciences, University of Southampton | Tremona Road, Southampton, SO16 6YD                                                                     |
| 26 |      |                                          |                                                                           |                                                                                                                                                                                                                                      |                                                                                                         |
| 27 | Dr   | Rodney Gilbert                           | Consultant Paediatric Nephrologist                                        | University Hospital Southampton NHS Foundation Trust                                                                                                                                                                                 | Tremona Road, Southampton, SO16 6YD                                                                     |
| 28 |      |                                          |                                                                           |                                                                                                                                                                                                                                      |                                                                                                         |
| 29 | Dr   | Francis J Gilchrist                      | Paediatric Respiratory Consultant                                         | University Hospitals of North Midlands NHS Trust                                                                                                                                                                                     | Staffordshire Children's Hospital at Royal Stoke, Newcastle Road, Stoke on Trent, ST4 6QG               |
| 30 |      |                                          |                                                                           |                                                                                                                                                                                                                                      |                                                                                                         |
| 31 | Mrs  | Clare Gilmour                            | Immunology Clinical Nurse Specialist                                      | St George's University Hospitals NHS Foundation Trust                                                                                                                                                                                | Cranmer Terrace, London, SW17 0RE                                                                       |
| 32 |      |                                          |                                                                           |                                                                                                                                                                                                                                      |                                                                                                         |
| 33 | Ms   | Claire Glemas                            | Research Nurse                                                            | Paediatric Gastroenterology, Cambridge University Hospitals NHS Foundation Trust                                                                                                                                                     | Hills Road, Cambridge, CB2 0QQ                                                                          |
| 34 | Dr   | Emma Grainger-Allen                      | Consultant Paediatric Allergy and Immunology                              | University Hospital Southampton NHS Foundation Trust                                                                                                                                                                                 | Tremona Road, Southampton, SO16 6YD                                                                     |
| 35 |      |                                          |                                                                           |                                                                                                                                                                                                                                      |                                                                                                         |
| 36 | Dr   | Juliet Gray                              | Associate Professor and Consultant in Paediatric Oncology                 | Department of Paediatric Oncology, University Hospital Southampton NHS Foundation Trust and Faculty of Medicine and Institute for Life Sciences, University of Southampton                                                           | Tremona Road, Southampton, SO16 6YD                                                                     |
| 37 |      |                                          |                                                                           |                                                                                                                                                                                                                                      |                                                                                                         |
| 38 | Ms   | Donna Griffiths                          | Paediatric Research Nurse                                                 | James Paget University Hospital                                                                                                                                                                                                      | Lowestoft Rd, Gorleston, NR31 6LA                                                                       |
| 39 |      |                                          |                                                                           |                                                                                                                                                                                                                                      |                                                                                                         |
| 40 | Mrs  | Rowena Guermech                          | Research Nurse                                                            | Paediatric Oncology and Haematology, Cambridge University Hospitals NHS Foundation Trust                                                                                                                                             | Hills Road, Cambridge, CB2 0QQ                                                                          |
| 41 |      |                                          |                                                                           |                                                                                                                                                                                                                                      |                                                                                                         |
| 42 | Mr   | Neil Hall                                | Research Nurse                                                            | Leeds Children Hospital                                                                                                                                                                                                              | Leeds Teaching Hospital NHS Trust, Great George Street, LS1 3EX                                         |
| 43 |      |                                          |                                                                           |                                                                                                                                                                                                                                      |                                                                                                         |

|    |      |                      |                                                               |                                                                                                                                                                            |                                                                                                                  |
|----|------|----------------------|---------------------------------------------------------------|----------------------------------------------------------------------------------------------------------------------------------------------------------------------------|------------------------------------------------------------------------------------------------------------------|
| 1  | Miss | Nicola Hamilton      | Paediatric Rheumatology Link Nurse                            | NHS Forth Valley                                                                                                                                                           | Forth Valley Royal Hospital, Stirling Road, Larbert FK5 4WR                                                      |
| 2  | Mrs  | Joanna Hancock       | Clinical Nurse Specialist                                     | University Hospital Southampton NHS Foundation Trust                                                                                                                       | Tremona Road, Southampton, SO16 6YD                                                                              |
| 3  | Dr   | Mushfequr R Haq      | Consultant Paediatric Nephrologist                            | University Hospital Southampton NHS Foundation Trust                                                                                                                       | Tremona Road, Southampton SO16 6YD                                                                               |
| 4  | Mrs  | Amanda Harris        | PCD & Children's Respiratory Clinical Nurse Specialist        | NIHR Southampton Biomedical Research Centre, University Hospital Southampton NHS Foundation Trust                                                                          |                                                                                                                  |
| 5  | Dr   | Kathryn Harrison     | Consultant Paediatric & Adolescent Rheumatology               | Rheumatology Department, Birmingham Children's Hospital, Birmingham Women's and Children's NHS Foundation Trust                                                            | Steelhouse Lane, Birmingham B4 6NH                                                                               |
| 6  | Ms   | Rebecca Harrop       | Data Manager                                                  | Great North Children's Hospital                                                                                                                                            | Royal Victoria Infirmary, Newcastle upon Tyne, NE1 4LP                                                           |
| 7  | Miss | Sarah Hartfree       | Paediatric Rheumatology Clinical Nurse Specialist             | University Hospital Southampton NHS Foundation Trust                                                                                                                       | Tremona Road, Southampton SO16 6YD                                                                               |
| 8  | Mrs  | Laura Hennelly       | Adolescent Research Nurse                                     | Centre for Adolescent Rheumatology Versus Arthritis, University College London                                                                                             | 3rd Floor Central, 250 Euston Road, London, NW1 2PG                                                              |
| 9  | Dr   | Avni Hindocha        | Paediatric trainee                                            | Royal Manchester Children's Hospital, Manchester University Hospitals NHS Trust,                                                                                           | Royal Manchester Children's Hospital, Manchester University Hospitals NHS Trust, Oxford Rd Manchester M13 9WL UK |
| 10 | Dr   | John Ho              | Consultant Paediatrician                                      | Whipps Cross University Hospital, London                                                                                                                                   | Whipps Cross Road, Leytonstone, London, E11 1NR                                                                  |
| 11 | Mrs  | Ruth Howman          | Clinical Research Sister                                      | Birmingham Children's Hospital, Birmingham Women's and Children's NHS Foundation Trust                                                                                     | Steelhouse Lane, Birmingham B4 6NH                                                                               |
| 12 | Ms   | Camilla Huber        | Research & Development                                        | Birmingham Women's Hospital, Birmingham Women's and Children's NHS Foundation Trust                                                                                        | Mindelsohn Way, Birmingham B15 2TG                                                                               |
| 13 | Dr   | Marjorie Illingworth | Paediatric Neurology Consultant                               | University Hospital Southampton NHS Foundation Trust                                                                                                                       | Tremona Road, Southampton, SO16 6YD                                                                              |
| 14 | Dr   | Winnie Ip            | Honorary Senior Lecturer & Consultant Paediatric Immunologist | Great Ormond Street Hospital for Children NHS Foundation Trust, Molecular and Cellular Immunology, University College London Great Ormond Street Institute of Child Health | Great Ormond Street, London WC1N 3JH, 30 Guilford Street, London, WC1N 1EH                                       |
| 15 | Dr   | Javed Iqbal          | Consultant Paediatrician                                      | East Lancs NHS Trust                                                                                                                                                       | Haslingden Road, Blackburn, BB2 3HH                                                                              |
| 16 | Dr   | Mark J Johnson       | Consultant Neonatologist                                      | Department of Neonatal Medicine, University Hospital Southampton NHS Foundation Trust, NIHR Biomedical Research Centre, University of Southampton                          | Tremona Road, Southampton, SO16 6YD                                                                              |
| 17 | Dr   | Christine E Jones    | Consultant Paediatric Infectious Diseases                     | University Hospital Southampton NHS Foundation Trust                                                                                                                       | Tremona Road, Southampton, SO16 6YD                                                                              |
| 18 | Mr   | James Jones          | Paediatric Research Nurse                                     | The Shrewsbury and Telford Hospital NHS Trust                                                                                                                              | Mytton Oak Road, Shrewsbury, Shropshire, SY3 8XQ                                                                 |
| 19 | Dr   | Jochen Kammermeier   | Consultant Paediatric Gastroenterologist                      | Evelina London Children's Hospital                                                                                                                                         | Westminster Bridge Road London SE1 7EH                                                                           |
| 20 | Dr   | Dagmar Kastner-Cole  | Consultant Paediatrician                                      | Tayside Children's Hospital, Ninewells Hospital and Medical School                                                                                                         | Dundee, DD1 9SY                                                                                                  |
| 21 | Dr   | Akhila Kavirayani    | Consultant Paediatric Rheumatology                            | Oxford University Hospitals NHS Foundation Trust                                                                                                                           | Nuffield Orthopaedic Centre, Oxford, OX3 7HE                                                                     |
| 22 | Prof | Deirdre Kelly        | Consultant Paediatric Hepatologist                            | Liver Unit, Birmingham Women's & Children's NHS Foundation Trust, University of Birmingham                                                                                 | Steelhouse Lane, Birmingham B4 6NH, Edgbaston, Birmingham B15 2TT                                                |
| 23 | Ms   | Imogen Kelly         | Clinical Nurse Specialist                                     | Royal Hospital for Sick Children, Edinburgh                                                                                                                                | 9 Sciennes Road, Edinburgh, EH1 9LF                                                                              |
| 24 | Dr   | Ciara Kennedy        | Clinical Trials Coordinator                                   | Great North Children's Hospital                                                                                                                                            | Royal Victoria Infirmary, Newcastle upon Tyne, NE1 4LP                                                           |
| 25 | Dr   | Larissa Kerecuk      | Clinical Research Specialty Lead Paediatrics, NIHR CRN        | Birmingham Children's Hospital, Birmingham Women's and Children's NHS Foundation Trust                                                                                     | Steelhouse Lane, Birmingham B4 6NH                                                                               |

|    |      |                                                         |                                                                               |                                                                                                                                                                                                                                                                                                                                                                                                                                   |
|----|------|---------------------------------------------------------|-------------------------------------------------------------------------------|-----------------------------------------------------------------------------------------------------------------------------------------------------------------------------------------------------------------------------------------------------------------------------------------------------------------------------------------------------------------------------------------------------------------------------------|
|    |      | West Midlands,<br>Consultant Paediatric<br>Nephrologist |                                                                               |                                                                                                                                                                                                                                                                                                                                                                                                                                   |
| 1  | Mr   | Charles Keys                                            | Consultant Paediatric<br>Surgery                                              | University Hospital Southampton NHS Foundation Trust<br>Tremona Road, Southampton, SO16 6YD                                                                                                                                                                                                                                                                                                                                       |
| 2  | Miss | Aline Kimonyo                                           | Research Coordinator                                                          | University College London Great Ormond Street Institute of Child<br>Health<br>UCL Great Ormond Street Institute of Child Health 30 Guilford Street<br>London WC1N 1EH                                                                                                                                                                                                                                                             |
| 3  | Mrs  | Sharon King                                             | Research Nurse                                                                | Great North Children's Hospital<br>Royal Victoria Infirmary, Newcastle upon Tyne, NE1 4LP                                                                                                                                                                                                                                                                                                                                         |
| 4  | Mrs  | Vicky King                                              | Clinical Trials<br>Practitioner                                               | Salisbury District Hospital<br>Salisbury, Wiltshire, SP2 8BJ                                                                                                                                                                                                                                                                                                                                                                      |
| 5  | Dr   | Fenella Kirkham                                         | Paediatric Neurology<br>Consultant                                            | University Hospital Southampton NHS Foundation Trust<br>Tremona Road, Southampton, SO16 6YD                                                                                                                                                                                                                                                                                                                                       |
| 6  | Dr   | Alice Leahy                                             | Consultant Paediatric<br>Rheumatologist                                       | University Hospital Southampton NHS Foundation Trust<br>Tremona Road, Southampton SO16 6YD                                                                                                                                                                                                                                                                                                                                        |
| 7  | Ms   | Gemma Lee                                               | Clinical Nurse Specialist<br>– Paediatric IBD                                 | Evelina London Children's Hospital<br>Westminster Bridge Road London SE1 7EH                                                                                                                                                                                                                                                                                                                                                      |
| 8  | Dr   | Julian Legg                                             | Paediatric Respiratory<br>Consultant                                          | University Hospital Southampton NHS Foundation Trust<br>Tremona Road, Southampton, SO16 6YD                                                                                                                                                                                                                                                                                                                                       |
| 9  | Dr   | Valentina Leone                                         | Consultant Paediatric<br>Rheumatology                                         | Leeds Children Hospital<br>Leeds Teaching Hospital NHS Trust, Great George Street, LS1 3EX                                                                                                                                                                                                                                                                                                                                        |
| 10 | Dr   | Derek Lim                                               | Consultant Clinical<br>Geneticist                                             | Clinical Genetics Department, West Midlands Regional Genetics<br>Service, Birmingham Women's and Children's Hospital NHS<br>Foundation Trust<br>Mindelsohn Way, Birmingham B15 2TG                                                                                                                                                                                                                                                |
| 11 | Mrs  | Adine Logan                                             | Research Nurse                                                                | East Lancs NHS Trust<br>Haslingden Road, Blackburn, BB2 3HH                                                                                                                                                                                                                                                                                                                                                                       |
| 12 | Prof | Jane Lucas                                              | Professor of Paediatric<br>Respiratory Medicine                               | PCD Centre, School of Clinical and Experimental Sciences, Faculty of<br>Medicine and Institute for Life Sciences, University of Southampton,<br>NIHR Southampton Biomedical Research Centre, University Hospital<br>Southampton NHS Foundation Trust;<br>Tremona Road, Southampton SO16 6YD                                                                                                                                       |
| 13 | Dr   | David Lynn                                              | Consultant Paediatrician                                                      | NHS Forth Valley<br>Forth Valley Royal Hospital, Stirling Road, Larbert FK5 4WR                                                                                                                                                                                                                                                                                                                                                   |
| 14 | Mrs  | Susan Macfarlane                                        | Paediatric Research<br>Nurse                                                  | Scottish Paediatric Research Network, Ninewells Hospital and Medical<br>School<br>Dundee, DD1 9SY                                                                                                                                                                                                                                                                                                                                 |
| 15 | Ms   | Lydia Makusha                                           | Neurology Specialist<br>Nurse                                                 | Neurology Specialist Nurse, Neurology Department, Birmingham<br>Children's Hospital, Birmingham Women's and Children's NHS<br>Foundation Trust<br>Steelhouse Lane, Birmingham B4 6NH                                                                                                                                                                                                                                              |
| 16 | Dr   | Gulshan A Malik                                         | Consultant Paediatrician                                                      | Royal Aberdeen Children hospital<br>Westburn road, Aberdeen Scotland, AB25 2ZG                                                                                                                                                                                                                                                                                                                                                    |
| 17 | Dr   | Stephen D Marks                                         | Reader and Consultant<br>in Paediatric Nephrology                             | NIHR Great Ormond Street Hospital Biomedical Research Centre,<br>University College London Great Ormond Street Institute of Child<br>Health<br>30 Guilford Street, London WC1N 1EH                                                                                                                                                                                                                                                |
| 18 | Dr   | Verghese Mathew                                         | Consultant Paediatrician                                                      | Hull University Teaching Hospitals NHS Trust<br>Anlaby Road, Hull, HU3 2JZ                                                                                                                                                                                                                                                                                                                                                        |
| 19 | Dr   | Janet E McDonagh                                        | Senior Lecturer in<br>Paediatric and<br>Adolescent<br>Rheumatology            | Versus Arthritis Centre for Epidemiology; Centre for MSK Research,<br>University of Manchester; NIHR Biomedical Research Centre,<br>Manchester University Hospital NHS Trust; Department of Paediatric<br>and Adolescent Rheumatology, Royal Manchester Children's Hospital,<br>Manchester University Hospitals NHS Trust<br>Centre for MSK Research, Stopford Building, University of Manchester<br>Oxford Rd Manchester M13 9PT |
| 20 | Dr   | Flora McErlane                                          | Consultant Paediatric<br>Rheumatologist and<br>Associate Clinical<br>Lecturer | Newcastle Hospitals NHS Foundation Trust and Institute of Health and<br>Society, Newcastle University<br>Royal Victoria Hospital, Queen Victoria Road, Newcastle upon Tyne. NE1<br>4LP                                                                                                                                                                                                                                            |
| 21 | Mrs  | Ann McGovern                                            | Senior Clinical Research<br>Practitioner in<br>Rheumatology                   | Royal Manchester Children's Hospital, Manchester University Hospitals<br>NHS Trust,<br>Royal Manchester Children's Hospital, Manchester University Hospitals<br>NHS Trust, Oxford Rd Manchester M13 9WL UK                                                                                                                                                                                                                        |



|    |      |                      |                                                          |                                                                                                                                                                                                                                      |                                                                                                         |
|----|------|----------------------|----------------------------------------------------------|--------------------------------------------------------------------------------------------------------------------------------------------------------------------------------------------------------------------------------------|---------------------------------------------------------------------------------------------------------|
| 1  | Ms   | Karen McIntyre       | Paediatric Specialist Nurse                              | Ninewells Hospital and Medical School                                                                                                                                                                                                | Dundee, DD1 9SY                                                                                         |
| 2  | Dr   | Ross McLean          | Specialty Doctor in Paediatrics                          | NHS Lanarkshire                                                                                                                                                                                                                      | Kirklands, Fallside Road. Bothwell, G71 8BB                                                             |
| 3  | Dr   | Paddy McMaster       | Consultant in Paediatric Infectious Diseases             | North Manchester General Hospital                                                                                                                                                                                                    | Delauneys Road, Manchester, M8 5RB                                                                      |
| 4  | Dr   | Nabil Melhem         | Consultant Paediatric Nephrologist                       | Department of Paediatric Nephrology, Evelina London Children's Hospital, Guy's & St. Thomas' Foundation Hospitals NHS Trust                                                                                                          | Westminster Bridge Road, London, SE1 7EH, UK                                                            |
| 5  | Ms   | Dawn Metcalfe        | Clinical Trials Associate                                | Great North Children's Hospital                                                                                                                                                                                                      | Royal Victoria Infirmary, Newcastle upon Tyne, NE1 4LP                                                  |
| 6  | Ms   | Danielle Miller      | Children's Research Nurse                                | Oxford University Hospitals NHS Foundation Trust                                                                                                                                                                                     | John Radcliff hospital, WWLG1 room 10.15, Oxford, OX3 9DU                                               |
| 7  | Ms   | Lynne Mills          | Information Analyst Advanced                             | NIHR Southampton Clinical Research Facility, University Hospital Southampton NHS Foundation Trust                                                                                                                                    | Tremona Road, Southampton, SO16 6YD                                                                     |
| 8  | Ms   | Lisa Moyes           | Paediatric Research Practitioner                         | Nottingham Children's Hospital, Queen's Medical Centre, Nottingham University Hospitals NHS Trust                                                                                                                                    | Derby Road, Nottingham, NG72UH                                                                          |
| 9  | Dr   | Alasdair Munro       | Clinical Research Fellow                                 | NIHR Southampton Clinical Research Facility and NIHR Southampton Biomedical Research Centre, University Hospital Southampton NHS Foundation Trust and Faculty of Medicine and Institute for Life Sciences, University of Southampton | Tremona Road, Southampton, SO16 6YD                                                                     |
| 10 | Miss | Olivia Murphy-Parry  | Paediatric Rheumatology Clinical Nurse Specialist        | University Hospital Southampton NHS Foundation Trust                                                                                                                                                                                 | Tremona Road, Southampton SO16 6YD                                                                      |
| 11 | Dr   | Mohamed Mutalib      | Consultant paediatric gastroenterologist                 | Evelina London Children' Hospital                                                                                                                                                                                                    | Westminster Bridge Road, London< SE1 7EH                                                                |
| 12 | Dr   | Arvind Nagra         | Consultant Paediatric Nephrologist                       | University Hospital Southampton NHS Foundation Trust                                                                                                                                                                                 | Tremona Road, Southampton SO16 6YD                                                                      |
| 13 | Dr   | Sarveshni Naidoo     | Consultant General Paediatrics                           | NHS Lanarkshire                                                                                                                                                                                                                      | Kirklands, Fallside Road. Bothwell, G71 8BB                                                             |
| 14 | Dr   | Gary Nicolin         | Consultant Paediatric Oncology                           | University Hospital Southampton NHS Foundation Trust                                                                                                                                                                                 | Tremona Road, Southampton, SO16 6YD                                                                     |
| 15 | Dr   | Maggie Nyirenda      | Consultant Paediatrician                                 | University Hospital Lewisham                                                                                                                                                                                                         | Paediatric Offices, Nockold House, University Hospital Lewisham, Lewisham High street, London, SE13 6LH |
| 16 | Mrs  | Grainne O'Connor     | Senior Paediatric Research Nurse                         | North Manchester General Hospital                                                                                                                                                                                                    | Delauneys Road, Manchester, M8 5RB                                                                      |
| 17 | Dr   | Sian O'Riordan       | Consultant Paediatric Immunology and Infectious Diseases | Leeds Children Hospital                                                                                                                                                                                                              | Leeds Teaching Hospital NHS Trust, Great George Street, LS1 3EX                                         |
| 18 | Dr   | Briget Oates         | Paediatric Consultant                                    | University Hospital Crosshouse                                                                                                                                                                                                       | Kilmarnock, KA2 0BE                                                                                     |
| 19 | Dr   | Daniel Owens         | Clinical Research Fellow                                 | NIHR Southampton Clinical Research Facility and NIHR Southampton Biomedical Research Centre, University Hospital Southampton NHS Foundation Trust and Faculty of Medicine and Institute for Life Sciences, University of Southampton | Tremona Road, Southampton, SO16 6YD                                                                     |
| 20 | Ms   | Krishna Panchal      | Clinical Trials Support Officer                          | Research Department, Lancashire Teaching Hospitals NHS Trusts                                                                                                                                                                        | Royal Preston Hospital, Sharoe Green Lane, Preston PR2 9HT                                              |
| 21 | Ms   | Sharon Parkes        | Nephrology and Rare Disease Research Coordinator         | Nephrology and Rare Disease Research Coordinator, R&D Department , Birmingham Women's and Children's NHS Foundation Trust                                                                                                            | Steelhouse Lane, Birmingham B4 6NH                                                                      |
| 22 | Mrs  | Charlotte Passingham | Research Co-ordinator                                    | Liver Unit, Birmingham Children's Hospital, Birmingham Women's and Children's NHS Foundation Trust                                                                                                                                   | Steelhouse Lane, Birmingham B4 6NH                                                                      |
| 23 | Mr   | Ravin Patel          | Medical Student                                          | University of Southampton                                                                                                                                                                                                            | University Rd, Southampton SO17 1BJ                                                                     |
| 24 | Dr   | Sanjay Patel         | Consultant Paediatric Infectious Diseases                | University Hospital Southampton NHS Foundation Trust                                                                                                                                                                                 | Tremona Road, Southampton, SO16 6YD                                                                     |

|    |      |                       |                                                        |                                                                                                                             |                                                                                                                  |
|----|------|-----------------------|--------------------------------------------------------|-----------------------------------------------------------------------------------------------------------------------------|------------------------------------------------------------------------------------------------------------------|
| 1  | Dr   | Margaret Peebles      | Consultant Paediatrician                               | Ninewells Hospital and Medical School                                                                                       | Dundee, DD1 9SY                                                                                                  |
| 2  | Dr   | Salina Persand        | Clinical Research Practitioner                         | Imperial College Healthcare NHS Trust and Imperial College London. Children's Clinical Research Facility                    |                                                                                                                  |
| 3  |      |                       | Paediatric Infectious Diseases Nurse Specialist        |                                                                                                                             |                                                                                                                  |
| 4  | Mrs  | Sharon Peters         |                                                        | North Manchester General Hospital                                                                                           | Delaunays Road, Manchester, M8 5RB                                                                               |
| 5  | Mrs  | Charlotte Phillips    | Team leader                                            | Childrens community Nursing Team, Kent community Health Foundation Trust                                                    | Trinity House, 110-12- Upper Pemberton, Kennington, Ashford, Kent, TN25 4AZ                                      |
| 6  | Mrs  | Helen Pidgeon         | Clinical Trials Assistant                              | Salisbury District Hospital                                                                                                 | Salisbury, Wiltshire, SP2 8BJ                                                                                    |
| 7  | Mrs  | Sue Power             | Paediatric Research Nurse                              | Poole Hospital NHS Foundation Trust                                                                                         | Longfleet Rd, Poole, BH15 2JB                                                                                    |
| 8  |      |                       | Consultant Paediatric Nephrologist                     |                                                                                                                             |                                                                                                                  |
| 9  | Dr   | Evgenia Preka         |                                                        | University Hospital Southampton NHS Foundation Trust                                                                        | Tremona Road, Southampton SO16 6YD                                                                               |
| 10 | Ms   | Vanessa Raimondo      | Clinical Nurse Specialist                              | Royal Hospital for Sick Children, Edinburgh                                                                                 | 9 Sciennes Road, Edinburgh, EH1 9LF                                                                              |
| 11 | Dr   | Jagadeesh Ramachandra | Consultant Paediatrician                               | Royal United Hospitals Bath NHS Foundation Trust                                                                            | Combe Park, Bath, BA1 3NG                                                                                        |
| 12 | Dr   | Ramya Ramanujachar    | Consultant Paediatric Oncology                         | University Hospital Southampton NHS Foundation Trust                                                                        | Tremona Road, Southampton, SO16 6YD                                                                              |
| 13 |      |                       | Clinical Nurse Specialist Nephrology                   | Department of Paediatric Nephrology, Evelina London Children's Hospital, Guy's & St. Thomas' Foundation Hospitals NHS Trust | Westminster Bridge Road, London, SE1 7EH, UK                                                                     |
| 14 | Miss | Pernille Rasmussen    |                                                        |                                                                                                                             |                                                                                                                  |
| 15 | Dr   | Trevor Richens        | Consultant Paediatric Cardiologist                     | University Hospital Southampton NHS Foundation Trust                                                                        | Tremona Road, Southampton, SO16 6YD                                                                              |
| 16 | Dr   | Valerie Rogers        | Consultant Paediatric Rheumatologist                   | University Hospital Bristol NHS Foundation trust                                                                            | Marlborough Street, Bristol, BS1 3NU                                                                             |
| 17 | Dr   | Erika Rojas-Jimenz    | Paediatric Research Clinical Fellow                    | Poole Hospital NHS Foundation Trust                                                                                         | Longfleet Rd, Poole, BH15 2JB                                                                                    |
| 18 | Dr   | Kevin Roman           | Consultant Paediatric Cardiologist                     | University Hospital Southampton NHS Foundation Trust                                                                        | Tremona Road, Southampton, SO16 6YD                                                                              |
| 19 | Ms   | Chloe Saad            | Clinical Research Assistant                            | University Hospital Lewisham                                                                                                | Paediatric Offices, Nockold House, University Hospital Lewisham, Lewisham High street, London, SE13 6LH          |
| 20 | Mr   | Stephen Saich         | CRF Clinical Research Project Manager                  | NIHR Southampton Clinical Research Facility, University Hospital Southampton NHS Foundation Trust                           | Tremona Road, Southampton, SO16 6YD                                                                              |
| 21 | Ms   | Rebecca Sarjeant      | Research Nurse                                         | Great North Children's Hospital                                                                                             | Royal Victoria Infirmary, Newcastle upon Tyne, NE1 4LP                                                           |
| 22 | Ms   | Paula Sauderson       | Clinical Trials Co-ordinator                           | Alder Hey Children's NHS Foundation Trust                                                                                   | Eaton Road, West Derby, Liverpool, L12 2AP                                                                       |
| 23 |      |                       | Clinical Nurse Specialist, Paediatric Gastroenterology |                                                                                                                             |                                                                                                                  |
| 24 | Miss | Francesca Schiavone   |                                                        | Morrison Hospital, Swansea Bay University Health Board                                                                      | Swansea, SA6 6NL                                                                                                 |
| 25 | Ms   | Beatrice Selby        | Clinical research coordinator                          | NIHR Southampton Clinical Research Facility, University Hospital Southampton NHS Foundation Trust                           | Tremona Road, Southampton SO16 6YD                                                                               |
| 26 | Dr   | Fiona Shackley        | Consultant Paediatric Infectious Diseases              | Sheffield Children's Hospital                                                                                               | Clarkson St, Broomhall, Sheffield S10 2TH                                                                        |
| 27 | Ms   | Jennifer Sharp        | Research Nurse                                         | Paediatric Research , Cambridge University Hospitals NHS Foundation Trust                                                   | Hills Road, Cambridge, CB2 0QQ                                                                                   |
| 28 | Dr   | Meera Shaunak         | Clinical Research Fellow                               | NIHR Southampton Clinical Research Facility, University Hospital Southampton NHS Foundation Trust                           | Tremona Road, Southampton, SO16 6YD                                                                              |
| 29 | Dr   | Mohan Shenoy          | consultant Paediatric nephrologist                     | Royal Manchester Children's Hospital, Manchester University Hospitals NHS Trust,                                            | Royal Manchester Children's Hospital, Manchester University Hospitals NHS Trust, Oxford Rd Manchester M13 9WL UK |
| 30 | Dr   | Vinay Shivamurthy     | Consultant Paediatric Rheumatology                     | Evelina London Children's Hospital                                                                                          | Westminster Bridge Road London SE1 7EH                                                                           |
| 31 | Ms   | Theresa Simangan      | Senior Paediatric Research Nurse                       | Whipps Cross University Hospital, London                                                                                    | Whipps Cross Road, Leytonstone, London, E11 1NR                                                                  |



|    |      |                     |                                                   |                                                                                                                                                                                                                                                                                                                                                                                                            |                                                                                           |
|----|------|---------------------|---------------------------------------------------|------------------------------------------------------------------------------------------------------------------------------------------------------------------------------------------------------------------------------------------------------------------------------------------------------------------------------------------------------------------------------------------------------------|-------------------------------------------------------------------------------------------|
| 1  | Dr   | Jaspal Singh        | Paediatric Neurology Consultant                   | University Hospital Southampton NHS Foundation Trust                                                                                                                                                                                                                                                                                                                                                       | Tremona Road, Southampton, SO16 6YD                                                       |
| 2  |      |                     |                                                   |                                                                                                                                                                                                                                                                                                                                                                                                            |                                                                                           |
| 3  | Mrs  | Samantha Small      | Paediatric Rheumatology Clinical Nurse Specialist | University Hospital Southampton NHS Foundation Trust                                                                                                                                                                                                                                                                                                                                                       | Tremona Road, Southampton SO16 6YD                                                        |
| 4  |      |                     |                                                   |                                                                                                                                                                                                                                                                                                                                                                                                            |                                                                                           |
| 5  | Dr   | Ameenat Lola Solebo | Consultant Paediatric Ophthalmology               | Great Ormond Street Hospital for Children NHS Foundation Trust, Population, Policy & Practice Research & Teaching Department, University College London Great Ormond Street Institute of Child Health                                                                                                                                                                                                      | Great Ormond Street, London WC1N 3JH, 30 Guilford Street, London WC1N 1EH                 |
| 6  |      |                     |                                                   |                                                                                                                                                                                                                                                                                                                                                                                                            |                                                                                           |
| 7  | Dr   | Helen Spencer       | Consultant in Transplant and Respiratory Medicine | Great Ormond Street Hospital for Children NHS Foundation Trust                                                                                                                                                                                                                                                                                                                                             | Great Ormond Street, London WC1N 3JH                                                      |
| 8  |      |                     |                                                   |                                                                                                                                                                                                                                                                                                                                                                                                            |                                                                                           |
| 9  | Dr   | Isaac Staff         | Foundation Doctor                                 | James Paget University Hospital                                                                                                                                                                                                                                                                                                                                                                            | Lowestoft Rd, Gorleston, NR31 6LA                                                         |
| 10 | Dr   | Karnam Sugumar      | Consultant Paediatrician                          | Department of Child Health, Lancashire Teaching Hospitals NHS Trusts                                                                                                                                                                                                                                                                                                                                       | Royal Preston Hospital, Sharoe Green Lane, Preston PR2 9HT                                |
| 11 |      |                     |                                                   |                                                                                                                                                                                                                                                                                                                                                                                                            |                                                                                           |
| 12 | Ms   | Zoe Swash           | Clinical research coordinator                     | NIHR Southampton Clinical Research Facility, University Hospital Southampton NHS Foundation Trust                                                                                                                                                                                                                                                                                                          | Tremona Road, Southampton, SO16 6YD                                                       |
| 13 |      |                     |                                                   |                                                                                                                                                                                                                                                                                                                                                                                                            |                                                                                           |
| 14 | Dr   | Sneha Tandon        | Consultant Paediatric Haematologist               | University Hospital Southampton NHS Foundation Trust                                                                                                                                                                                                                                                                                                                                                       | Tremona Road, Southampton SO16 6YD                                                        |
| 15 |      |                     |                                                   |                                                                                                                                                                                                                                                                                                                                                                                                            |                                                                                           |
| 16 | Dr   | Marc Tebruegge      | Consultant in infectious diseases and immunology  | Evelina London Children's Hospital                                                                                                                                                                                                                                                                                                                                                                         | Westminster Bridge Road London SE1 7EH                                                    |
| 17 |      |                     |                                                   |                                                                                                                                                                                                                                                                                                                                                                                                            |                                                                                           |
| 18 | Ms   | Evelyn Thomson      | Research Nurse                                    | Great North Children's Hospital                                                                                                                                                                                                                                                                                                                                                                            | Royal Victoria Infirmary, Newcastle upon Tyne, NE1 4LP                                    |
| 19 | Dr   | Mark Tighe          | Consultant Paediatrician                          | Poole Hospital NHS Foundation Trust                                                                                                                                                                                                                                                                                                                                                                        | Longfleet Rd, Poole, BH15 2JB                                                             |
| 20 |      |                     |                                                   |                                                                                                                                                                                                                                                                                                                                                                                                            |                                                                                           |
| 21 | Mrs  | Joanne Tomlinson    | Research Nurse                                    | University Hospitals of North Midlands NHS Trust                                                                                                                                                                                                                                                                                                                                                           | Staffordshire Children's Hospital at Royal Stoke, Newcastle Road, Stoke on Trent, ST4 6QG |
| 22 | Dr   | Nicola Trevelyan    | Consultant Paediatric Diabetologist               | University Hospital Southampton NHS Foundation Trust                                                                                                                                                                                                                                                                                                                                                       | Tremona Road, Southampton, SO16 6YD                                                       |
| 23 |      |                     |                                                   |                                                                                                                                                                                                                                                                                                                                                                                                            |                                                                                           |
| 24 | Dr   | Brigitte Vollmer    | Paediatric Neurology Consultant                   | University Hospital Southampton NHS Foundation Trust                                                                                                                                                                                                                                                                                                                                                       | Tremona Road, Southampton, SO16 6YD                                                       |
| 25 |      |                     |                                                   |                                                                                                                                                                                                                                                                                                                                                                                                            |                                                                                           |
| 26 | Dr   | Woolf Walker        | Paediatric Respiratory Consultant                 | PCD Centre, University Hospital Southampton NHS Foundation Trust, School of Clinical and Experimental Sciences, Faculty of Medicine and Institute for Life Sciences, University of Southampton, NIHR Southampton Biomedical Research Centre, University Hospital Southampton NHS Foundation Trust                                                                                                          | Tremona Road, Southampton SO16 6YD                                                        |
| 27 |      |                     |                                                   |                                                                                                                                                                                                                                                                                                                                                                                                            |                                                                                           |
| 28 | Dr   | Jo Walsh            | Consultant Paediatric Rheumatology                | Royal Hospital for Children Glasgow                                                                                                                                                                                                                                                                                                                                                                        | 345 Govan Rd, Glasgow G51 4TF                                                             |
| 29 |      |                     |                                                   |                                                                                                                                                                                                                                                                                                                                                                                                            |                                                                                           |
| 30 | Ms   | Rachel Wane         | Lead Research Nurse – Children's Team             | Bradford Teaching Hospitals NHS Foundation Trust                                                                                                                                                                                                                                                                                                                                                           | Duckworth Lane, Bradford, West Yorkshire, BD9 6RJ                                         |
| 31 |      |                     |                                                   |                                                                                                                                                                                                                                                                                                                                                                                                            |                                                                                           |
| 32 | Dr   | Evangeline Wassmer  | Paediatric Neurology Consultant                   | Neurology Dept, Birmingham Children's Hospital, Birmingham Women's and Children's NHS Foundation Trust                                                                                                                                                                                                                                                                                                     | Steelhouse Lane, Birmingham B4 6NH                                                        |
| 33 |      |                     |                                                   |                                                                                                                                                                                                                                                                                                                                                                                                            |                                                                                           |
| 34 | Mrs  | Elizabeth Waxman    | Paediatric Research Nurse Manager                 | Glasgow Clinical Research Facility                                                                                                                                                                                                                                                                                                                                                                         | 345 Govan Rd, Glasgow G51 4TF                                                             |
| 35 |      |                     |                                                   |                                                                                                                                                                                                                                                                                                                                                                                                            |                                                                                           |
| 36 |      |                     |                                                   |                                                                                                                                                                                                                                                                                                                                                                                                            |                                                                                           |
| 37 |      |                     |                                                   |                                                                                                                                                                                                                                                                                                                                                                                                            |                                                                                           |
| 38 |      |                     |                                                   |                                                                                                                                                                                                                                                                                                                                                                                                            |                                                                                           |
| 39 | Prof | Lucy R Wedderburn   | Consultant Paediatric Rheumatology                | Infection, Immunity and Inflammation Research & Teaching Department, University College London Great Ormond Street Institute of Child Health, Paediatric Rheumatology, Great Ormond Street Hospital NHS Foundation Trust, NIHR Great Ormond Street Hospital Biomedical Research Centre, Arthritis Research UK Centre for Adolescent Rheumatology, GOS Institute of Child Health, University College London | 30 Guilford Street, London, WC1N 1EH, Great Ormond Street, London WC1N 3JH                |
| 40 |      |                     |                                                   |                                                                                                                                                                                                                                                                                                                                                                                                            |                                                                                           |
| 41 | Mrs  | Lucy Wellings       | Paediatric and Adolescent Research Nurse          | University College London NHS Foundation Trust                                                                                                                                                                                                                                                                                                                                                             | 3rd Floor Central, 250 Euston Road, London, NW1 2PG                                       |
| 42 |      |                     |                                                   |                                                                                                                                                                                                                                                                                                                                                                                                            |                                                                                           |
| 43 |      |                     |                                                   |                                                                                                                                                                                                                                                                                                                                                                                                            |                                                                                           |
| 44 |      |                     |                                                   |                                                                                                                                                                                                                                                                                                                                                                                                            |                                                                                           |
| 45 |      |                     |                                                   |                                                                                                                                                                                                                                                                                                                                                                                                            |                                                                                           |
| 46 |      |                     |                                                   |                                                                                                                                                                                                                                                                                                                                                                                                            |                                                                                           |

|    |     |                     |                                              |                                                                                                          |                                                                 |
|----|-----|---------------------|----------------------------------------------|----------------------------------------------------------------------------------------------------------|-----------------------------------------------------------------|
| 1  | Dr  | Andrea Whitney      | Paediatric Neurology Consultant              | University Hospital Southampton NHS Foundation Trust                                                     | Tremona Road, Southampton, SO16 6YD                             |
| 2  | Dr  | Elizabeth Whittaker | Consultant Paediatric Infectious Diseases    | Imperial College Healthcare NHS Trust and Imperial College London. Children's Clinical Research Facility | 2nd Floor Cambridge Wing, Norfolk Place, London W2 1NY          |
| 3  | Mrs | Rachel Wiffen       | Paediatric Research Practitioner             | Nottingham Children's Hospital, Queen's Medical Centre, Nottingham University Hospitals NHS Trust        | Derby Road, Nottingham, NG72UH                                  |
| 4  | Mr  | Matthew Wilkins     | Clinical research coordinator                | NIHR Southampton Clinical Research Facility, University Hospital Southampton NHS Foundation Trust        | Tremona Road, Southampton SO16 6YD                              |
| 5  | Ms  | Jessica Williams    | Data Manager                                 | Great North Children's Hospital                                                                          | Royal Victoria Infirmary, Newcastle upon Tyne, NE1 4LP          |
| 6  | Dr  | Mark Wood           | Consultant Paediatric Rheumatology           | Leeds Children Hospital                                                                                  | Leeds Teaching Hospital NHS Trust, Great George Street, LS1 3EX |
| 7  | Mrs | Sophie Wool         | Research Nurse                               | Paediatric Oncology and Haematology, Cambridge University Hospitals NHS Foundation Trust                 | Hills Road, Cambridge, CB2 0QQ                                  |
| 8  | Ms  | Suzannah Wright     | Project Manager                              | Paediatric Infectious Diseases Research Group, St George's, University of London                         | Cranmer Terrace, London, SW17 0RE                               |
| 9  | Mrs | Wing Han Wu         | Clinical Research Coordinator                | Centre for Adolescent Rheumatology Versus Arthritis, University College London                           | 3rd Floor Central, 250 Euston Road, London, NW1 2PG             |
| 10 | Ms  | Caroline Youle      | Respiratory Nurse Specialist/ Research Nurse | Nottingham Children's Hospital, Queen's Medical Centre, Nottingham University Hospitals NHS Trust        | Derby Road, Nottingham, NG72UH                                  |

## Appendix B: Participating Centres

| Participating centre                          | Number of Patients Recruited | %     |
|-----------------------------------------------|------------------------------|-------|
| University Hospital Southampton               | 163                          | 10.99 |
| John Radcliffe Hospital Oxford                | 26                           | 1.75  |
| Royal Manchester Children's Hospital          | 89                           | 6.00  |
| Birmingham Women's and Children's Hospital    | 145                          | 9.78  |
| Cardiff and Vale University Health Board      | 35                           | 2.36  |
| Nottingham Children's Hospital                | 47                           | 3.17  |
| Great North Children's Hospital               | 169                          | 11.40 |
| Leeds General Infirmary Children's Hospital   | 18                           | 1.21  |
| Bradford Teaching Hospital                    | 12                           | 0.81  |
| Alder Hey Children's Hospital Liverpool       | 42                           | 2.83  |
| Great Ormond Street Hospital                  | 176                          | 11.87 |
| St Georges Hospital London                    | 30                           | 2.02  |
| Sheffield Children's Hospital                 | 56                           | 3.78  |
| Royal Hospital for Children Glasgow           | 57                           | 3.84  |
| Royal Hospital for Sick Children Edinburgh    | 18                           | 1.21  |
| University Hospital Coventry and Warwickshire | 23                           | 1.55  |
| East Lancashire Hospitals NHS Trust           | 35                           | 2.36  |
| Northern Manchester General Hospital          | 4                            | 0.27  |
| Addenbrooke's Hospital Cambridge              | 49                           | 3.30  |
| Swansea Bay University Health Board           | 2                            | 0.13  |
| Ayrshire and Arran Health Board               | 4                            | 0.27  |
| Norfolk and Norwich University Hospital       | 2                            | 0.13  |
| Salisbury NHS Trust                           | 6                            | 0.40  |
| University College London Hospitals           | 5                            | 0.34  |
| James Paget University Hospital               | 23                           | 1.55  |
| Kent Community Health                         | 10                           | 0.67  |
| Royal Marsden Trust                           | 6                            | 0.40  |
| Bristol Royal Hospital for Children           | 21                           | 1.42  |
| Royal Alexandra Children's Hospital Brighton  | 13                           | 0.88  |
| Tayside Children's Hospital                   | 15                           | 1.01  |
| Royal Aberdeen Children's Hospital            | 25                           | 1.69  |
| NHS Forth Valley                              | 2                            | 0.13  |
| Royal United Hospitals Bath                   | 16                           | 1.08  |
| Evelina London Children's Hospital            | 28                           | 1.89  |
| NHS Lanarkshire                               | 47                           | 3.17  |
| University Hospital North Midlands            | 11                           | 0.74  |
| St Marys Hospital London                      | 3                            | 0.20  |
| Lancashire Teaching Hospital                  | 2                            | 0.13  |
| Kings College Hospital                        | 22                           | 1.48  |
| Poole Hospital                                | 23                           | 1.55  |
| Barts Health NHS Trust                        | 3                            | 0.20  |

## Appendix C: Weekly Questionnaire

| In the week beginning xx/xx/xxxx have you experienced any of the following symptoms? |                                                                                                                                                |                                                                                                                                                                                                                                                           |
|--------------------------------------------------------------------------------------|------------------------------------------------------------------------------------------------------------------------------------------------|-----------------------------------------------------------------------------------------------------------------------------------------------------------------------------------------------------------------------------------------------------------|
| 1.1                                                                                  | I have had no symptoms                                                                                                                         | <input type="radio"/> I have had no symptoms<br><input type="radio"/> I have had symptoms                                                                                                                                                                 |
| 1.2                                                                                  | Measured temperature above 38 °C                                                                                                               | <input type="radio"/> Yes<br><input type="radio"/> No                                                                                                                                                                                                     |
| 1.2.1                                                                                | <b>If 'Measured temperature above 38 °C' is equal to 'Yes' answer this question:</b><br>Which days did you measure a temperature above 38 °C?  | <input type="checkbox"/> Monday<br><input type="checkbox"/> Tuesday<br><input type="checkbox"/> Wednesday<br><input type="checkbox"/> Thursday<br><input type="checkbox"/> Friday<br><input type="checkbox"/> Saturday<br><input type="checkbox"/> Sunday |
| 1.2.2                                                                                | <b>If 'Measured temperature above 38 °C' is equal to 'Yes' answer this question:</b><br>Have you experienced a worsening of the above symptom? | <input type="radio"/> Yes<br><input type="radio"/> No                                                                                                                                                                                                     |
| 1.3                                                                                  | Cough                                                                                                                                          | <input type="radio"/> Yes<br><input type="radio"/> No                                                                                                                                                                                                     |
| 1.3.1                                                                                | <b>If 'Cough' is equal to 'Yes' answer this question:</b><br>Which days did you experience a cough?                                            | <input type="checkbox"/> Monday<br><input type="checkbox"/> Tuesday<br><input type="checkbox"/> Wednesday<br><input type="checkbox"/> Thursday<br><input type="checkbox"/> Friday<br><input type="checkbox"/> Saturday<br><input type="checkbox"/> Sunday |
| 1.3.2                                                                                | <b>If 'Cough' is equal to 'Yes' answer this question:</b><br>Have you experienced a worsening of the above symptom?                            | <input type="radio"/> Yes<br><input type="radio"/> No                                                                                                                                                                                                     |
| 1.4                                                                                  | Shortness of breath                                                                                                                            | <input type="radio"/> Yes<br><input type="radio"/> No                                                                                                                                                                                                     |
| 1.4.1                                                                                | <b>If 'Shortness of breath' is equal to 'Yes' answer this question:</b><br>Which days did you experience shortness of breath?                  | <input type="checkbox"/> Monday<br><input type="checkbox"/> Tuesday<br><input type="checkbox"/> Wednesday<br><input type="checkbox"/> Thursday<br><input type="checkbox"/> Friday<br><input type="checkbox"/> Saturday                                    |

|       |                                                                                                                                   |                                                                                                                                                                                                                                                           |
|-------|-----------------------------------------------------------------------------------------------------------------------------------|-----------------------------------------------------------------------------------------------------------------------------------------------------------------------------------------------------------------------------------------------------------|
|       |                                                                                                                                   | <input type="checkbox"/> Sunday                                                                                                                                                                                                                           |
| 1.4.2 | <b>If 'Shortness of breath' is equal to 'Yes' answer this question:</b><br>Have you experienced a worsening of the above symptom? | <input type="radio"/> Yes<br><input type="radio"/> No                                                                                                                                                                                                     |
| 1.5   | Sore throat                                                                                                                       | <input type="radio"/> Yes<br><input type="radio"/> No                                                                                                                                                                                                     |
| 1.5.1 | <b>If 'Sore throat' is equal to 'Yes' answer this question:</b><br>Which days did you experience sore throat?                     | <input type="checkbox"/> Monday<br><input type="checkbox"/> Tuesday<br><input type="checkbox"/> Wednesday<br><input type="checkbox"/> Thursday<br><input type="checkbox"/> Friday<br><input type="checkbox"/> Saturday<br><input type="checkbox"/> Sunday |
| 1.5.2 | <b>If 'Sore throat' is equal to 'Yes' answer this question:</b><br>Have you experienced a worsening of the above symptom?         | <input type="radio"/> Yes<br><input type="radio"/> No                                                                                                                                                                                                     |
| 1.6   | Blocked nose                                                                                                                      | <input type="radio"/> Yes<br><input type="radio"/> No                                                                                                                                                                                                     |
| 1.6.1 | <b>If 'Blocked nose' is equal to 'Yes' answer this question:</b><br>Which days did you experience blocked nose?                   | <input type="checkbox"/> Monday<br><input type="checkbox"/> Tuesday<br><input type="checkbox"/> Wednesday<br><input type="checkbox"/> Thursday<br><input type="checkbox"/> Friday<br><input type="checkbox"/> Saturday<br><input type="checkbox"/> Sunday |
| 1.6.2 | <b>If 'Blocked nose' is equal to 'Yes' answer this question:</b><br>Have you experienced a worsening of the above symptom?        | <input type="radio"/> Yes<br><input type="radio"/> No                                                                                                                                                                                                     |
| 1.7   | Red eyes                                                                                                                          | <input type="radio"/> Yes<br><input type="radio"/> No                                                                                                                                                                                                     |
| 1.7.1 | <b>If 'Red eyes' is equal to 'Yes' answer this question:</b><br>Which days did you experience red eyes?                           | <input type="checkbox"/> Monday<br><input type="checkbox"/> Tuesday<br><input type="checkbox"/> Wednesday<br><input type="checkbox"/> Thursday<br><input type="checkbox"/> Friday<br><input type="checkbox"/> Saturday<br><input type="checkbox"/> Sunday |
| 1.7.2 | <b>If 'Red eyes' is equal to 'Yes' answer this question:</b>                                                                      | <input type="radio"/> Yes<br><input type="radio"/> No                                                                                                                                                                                                     |

|        |                                                                                                                           |                                                                                                                                                                                                                                                           |
|--------|---------------------------------------------------------------------------------------------------------------------------|-----------------------------------------------------------------------------------------------------------------------------------------------------------------------------------------------------------------------------------------------------------|
|        | Have you experienced a worsening of the above symptom?                                                                    |                                                                                                                                                                                                                                                           |
| 1.8    | Headache                                                                                                                  | <input type="radio"/> Yes<br><input type="radio"/> No                                                                                                                                                                                                     |
| 1.8.1  | <b>If 'Headache' is equal to 'Yes' answer this question:</b><br>Which days did you experience headache?                   | <input type="checkbox"/> Monday<br><input type="checkbox"/> Tuesday<br><input type="checkbox"/> Wednesday<br><input type="checkbox"/> Thursday<br><input type="checkbox"/> Friday<br><input type="checkbox"/> Saturday<br><input type="checkbox"/> Sunday |
| 1.8.2  | <b>If 'Headache' is equal to 'Yes' answer this question:</b><br>Have you experienced a worsening of the above symptom?    | <input type="radio"/> Yes<br><input type="radio"/> No                                                                                                                                                                                                     |
| 1.9    | Joint pain                                                                                                                | <input type="radio"/> Yes<br><input type="radio"/> No                                                                                                                                                                                                     |
| 1.9.1  | <b>If 'Joint pain' is equal to 'Yes' answer this question:</b><br>Which days did you experience joint pain?               | <input type="checkbox"/> Monday<br><input type="checkbox"/> Tuesday<br><input type="checkbox"/> Wednesday<br><input type="checkbox"/> Thursday<br><input type="checkbox"/> Friday<br><input type="checkbox"/> Saturday<br><input type="checkbox"/> Sunday |
| 1.9.2  | <b>If 'Joint pain' is equal to 'Yes' answer this question:</b><br>Have you experienced a worsening of the above symptom?  | <input type="radio"/> Yes<br><input type="radio"/> No                                                                                                                                                                                                     |
| 1.10   | Muscle pain                                                                                                               | <input type="radio"/> Yes<br><input type="radio"/> No                                                                                                                                                                                                     |
| 1.10.1 | <b>If 'Muscle pain' is equal to 'Yes' answer this question:</b><br>Which days did you experience muscle pain?             | <input type="checkbox"/> Monday<br><input type="checkbox"/> Tuesday<br><input type="checkbox"/> Wednesday<br><input type="checkbox"/> Thursday<br><input type="checkbox"/> Friday<br><input type="checkbox"/> Saturday<br><input type="checkbox"/> Sunday |
| 1.10.2 | <b>If 'Muscle pain' is equal to 'Yes' answer this question:</b><br>Have you experienced a worsening of the above symptom? | <input type="radio"/> Yes<br><input type="radio"/> No                                                                                                                                                                                                     |
| 1.11   | Fatigue                                                                                                                   | <input type="radio"/> Yes<br><input type="radio"/> No                                                                                                                                                                                                     |

|                                                             |        |                                                                                                                       |                                                                                                                                                                                                                                                           |
|-------------------------------------------------------------|--------|-----------------------------------------------------------------------------------------------------------------------|-----------------------------------------------------------------------------------------------------------------------------------------------------------------------------------------------------------------------------------------------------------|
| 1<br>2<br>3<br>4<br>5<br>6<br>7<br>8<br>9<br>10<br>11<br>12 | 1.11.1 | <b>If 'Fatigue' is equal to 'Yes' answer this question:</b><br>Which days did you experience fatigue?                 | <input type="checkbox"/> Monday<br><input type="checkbox"/> Tuesday<br><input type="checkbox"/> Wednesday<br><input type="checkbox"/> Thursday<br><input type="checkbox"/> Friday<br><input type="checkbox"/> Saturday<br><input type="checkbox"/> Sunday |
| 13<br>14<br>15<br>16<br>17                                  | 1.11.2 | <b>If 'Fatigue' is equal to 'Yes' answer this question:</b><br>Have you experienced a worsening of the above symptom? | <input type="radio"/> Yes<br><input type="radio"/> No                                                                                                                                                                                                     |
| 18<br>19<br>20                                              | 1.12   | Chills                                                                                                                | <input type="radio"/> Yes<br><input type="radio"/> No                                                                                                                                                                                                     |
| 21<br>22<br>23<br>24<br>25<br>26<br>27<br>28<br>29          | 1.12.1 | <b>If 'Chills' is equal to 'Yes' answer this question:</b><br>Which days did you experience chills?                   | <input type="checkbox"/> Monday<br><input type="checkbox"/> Tuesday<br><input type="checkbox"/> Wednesday<br><input type="checkbox"/> Thursday<br><input type="checkbox"/> Friday<br><input type="checkbox"/> Saturday<br><input type="checkbox"/> Sunday |
| 30<br>31<br>32<br>33<br>34                                  | 1.12.2 | <b>If 'Chills' is equal to 'Yes' answer this question:</b><br>Have you experienced a worsening of the above symptom?  | <input type="radio"/> Yes<br><input type="radio"/> No                                                                                                                                                                                                     |
| 35<br>36<br>37                                              | 1.13   | Nausea                                                                                                                | <input type="radio"/> Yes<br><input type="radio"/> No                                                                                                                                                                                                     |
| 38<br>39<br>40<br>41<br>42<br>43<br>44<br>45<br>46          | 1.13.1 | <b>If 'Nausea' is equal to 'Yes' answer this question:</b><br>Which days did you experience nausea?                   | <input type="checkbox"/> Monday<br><input type="checkbox"/> Tuesday<br><input type="checkbox"/> Wednesday<br><input type="checkbox"/> Thursday<br><input type="checkbox"/> Friday<br><input type="checkbox"/> Saturday<br><input type="checkbox"/> Sunday |
| 47<br>48<br>49<br>50<br>51                                  | 1.13.2 | <b>If 'Nausea' is equal to 'Yes' answer this question:</b><br>Have you experienced a worsening of the above symptom?  | <input type="radio"/> Yes<br><input type="radio"/> No                                                                                                                                                                                                     |
| 52<br>53<br>54                                              | 1.14   | Vomiting                                                                                                              | <input type="radio"/> Yes<br><input type="radio"/> No                                                                                                                                                                                                     |
| 55<br>56<br>57<br>58<br>59<br>60                            | 1.14.1 | <b>If 'Vomiting' is equal to 'Yes' answer this question:</b><br>Which days did you experience vomiting?               | <input type="checkbox"/> Monday<br><input type="checkbox"/> Tuesday<br><input type="checkbox"/> Wednesday<br><input type="checkbox"/> Thursday<br><input type="checkbox"/> Friday                                                                         |

|        |                                                                                                                                       |                                                                                                                                                                                                                                                           |
|--------|---------------------------------------------------------------------------------------------------------------------------------------|-----------------------------------------------------------------------------------------------------------------------------------------------------------------------------------------------------------------------------------------------------------|
|        |                                                                                                                                       | <input type="checkbox"/> Saturday<br><input type="checkbox"/> Sunday                                                                                                                                                                                      |
| 1.14.2 | <b>If 'Vomiting' is equal to 'Yes' answer this question:</b><br>Have you experienced a worsening of the above symptom?                | <input type="radio"/> Yes<br><input type="radio"/> No                                                                                                                                                                                                     |
| 1.15   | Diarrhoea                                                                                                                             | <input type="radio"/> Yes<br><input type="radio"/> No                                                                                                                                                                                                     |
| 1.15.1 | <b>If 'Diarrhoea' is equal to 'Yes' answer this question:</b><br>Which days did you experience diarrhoea?                             | <input type="checkbox"/> Monday<br><input type="checkbox"/> Tuesday<br><input type="checkbox"/> Wednesday<br><input type="checkbox"/> Thursday<br><input type="checkbox"/> Friday<br><input type="checkbox"/> Saturday<br><input type="checkbox"/> Sunday |
| 1.15.2 | <b>If 'Diarrhoea' is equal to 'Yes' answer this question:</b><br>Have you experienced a worsening of the above symptom?               | <input type="radio"/> Yes<br><input type="radio"/> No                                                                                                                                                                                                     |
| 1.16   | Loss of smell or taste                                                                                                                | <input type="radio"/> Yes<br><input type="radio"/> No                                                                                                                                                                                                     |
| 1.16.1 | <b>If 'Loss of smell or taste' is equal to 'Yes' answer this question:</b><br>Which days did you experience loss of smell or taste?   | <input type="checkbox"/> Monday<br><input type="checkbox"/> Tuesday<br><input type="checkbox"/> Wednesday<br><input type="checkbox"/> Thursday<br><input type="checkbox"/> Friday<br><input type="checkbox"/> Saturday<br><input type="checkbox"/> Sunday |
| 1.16.2 | <b>If 'Loss of smell or taste' is equal to 'Yes' answer this question:</b><br>Have you experienced a worsening of the above symptom?  | <input type="radio"/> Yes<br><input type="radio"/> No                                                                                                                                                                                                     |
| 1.17   | Other symptoms                                                                                                                        |                                                                                                                                                                                                                                                           |
| 2.1    | Has your child changed medication this week?                                                                                          | <input type="radio"/> Yes<br><input type="radio"/> No                                                                                                                                                                                                     |
| 2.1.1  | <b>If 'Has your child changed medication this week?' if equal to 'Yes' answer this question:</b> What medication has changed and how? |                                                                                                                                                                                                                                                           |



|       |                                                                                                                                                                                                                                        |                                                                                                                                                                                                                |
|-------|----------------------------------------------------------------------------------------------------------------------------------------------------------------------------------------------------------------------------------------|----------------------------------------------------------------------------------------------------------------------------------------------------------------------------------------------------------------|
| 2.2   | Was your child in contact with someone who is diagnosed with or suspected to have coronavirus?                                                                                                                                         | <input type="radio"/> Yes<br><input type="radio"/> No<br><input type="radio"/> Not known                                                                                                                       |
| 2.3   | Did your child visit the NHS because you were worried about coronavirus infection?                                                                                                                                                     | <input type="radio"/> Yes<br><input type="radio"/> No<br><input type="radio"/> Not known                                                                                                                       |
| 2.4   | Did your child have a test for coronavirus?                                                                                                                                                                                            | <input type="radio"/> Yes<br><input type="radio"/> No<br><input type="radio"/> Not known                                                                                                                       |
| 2.5   | Did your child have a confirmed diagnosis of coronavirus infection?                                                                                                                                                                    | <input type="radio"/> Yes<br><input type="radio"/> No<br><input type="radio"/> Not known                                                                                                                       |
| 2.6   | Was your child admitted to hospital because of a coronavirus infection?                                                                                                                                                                | <input type="radio"/> Yes<br><input type="radio"/> No<br><input type="radio"/> Not known                                                                                                                       |
| 2.6.1 | <b>If 'Was your child admitted to hospital because of a coronavirus infection?' is equal to 'Yes' answer this question:</b> When was your child admitted?                                                                              | dd-mm-yyyy                                                                                                                                                                                                     |
| 2.6.2 | <b>If 'Was your child admitted to hospital because of a coronavirus infection?' is equal to 'Yes' answer this question:</b> How many days was your child admitted?                                                                     |                                                                                                                                                                                                                |
| 2.7   | Did you have to self-isolate your child because they had symptoms or because of medical advice related to coronavirus?                                                                                                                 | <input type="radio"/> Yes<br><input type="radio"/> No<br><input type="radio"/> Not known                                                                                                                       |
| 2.7.1 | <b>If 'Did you have to self-isolate your child because they had symptoms or because of medical advice related to coronavirus?' is equal to 'Yes' answer this question:</b><br>How many days did you self-isolate your child this week? | <input type="checkbox"/> 1<br><input type="checkbox"/> 2<br><input type="checkbox"/> 3<br><input type="checkbox"/> 4<br><input type="checkbox"/> 5<br><input type="checkbox"/> 6<br><input type="checkbox"/> 7 |
| 2.8   | Were immunosuppressive drugs postponed because of coronavirus infection?                                                                                                                                                               | <input type="radio"/> Yes<br><input type="radio"/> No<br><input type="radio"/> Not known                                                                                                                       |
| 2.8.1 | <b>If 'Were immunosuppressive drugs postponed because of coronavirus infection?' is equal to 'Yes' answer this question:</b> How many days did you                                                                                     | <input type="checkbox"/> 1<br><input type="checkbox"/> 2<br><input type="checkbox"/> 3<br><input type="checkbox"/> 4                                                                                           |

|        |                                                                                                                                                                                  |                                                                                                                                                                                                                |
|--------|----------------------------------------------------------------------------------------------------------------------------------------------------------------------------------|----------------------------------------------------------------------------------------------------------------------------------------------------------------------------------------------------------------|
|        | postpone the immunosuppressants this week?                                                                                                                                       | <input type="checkbox"/> 5<br><input type="checkbox"/> 6<br><input type="checkbox"/> 7                                                                                                                         |
| 2.9    | Did your child miss any sports or fun activities because of the coronavirus pandemic?                                                                                            | <input type="radio"/> Yes<br><input type="radio"/> No<br><input type="radio"/> Not known                                                                                                                       |
| 2.9.1  | <b>If 'Did your child miss any sports or fun activities because of the coronavirus pandemic?' is equal to Yes answer this question:</b> How many activities did your child miss? |                                                                                                                                                                                                                |
| 2.10   | Did your child miss school because of coronavirus infection?                                                                                                                     | <input type="radio"/> Yes<br><input type="radio"/> No<br><input type="radio"/> Not known                                                                                                                       |
| 2.10.1 | <b>If 'Did your child miss school because of coronavirus infection?' is equal to Yes answer this question:</b> How many days of school did your child miss this week?            | <input type="checkbox"/> 1<br><input type="checkbox"/> 2<br><input type="checkbox"/> 3<br><input type="checkbox"/> 4<br><input type="checkbox"/> 5<br><input type="checkbox"/> 6<br><input type="checkbox"/> 7 |
| 2.11   | On a scale of 0-10, how worried are you about coronavirus affecting your child? (0 = not worried, 10 = extremely worried)                                                        |                                                                                                                                                                                                                |
| 2.12   | Is there anything that you are particularly worried about that you would like to share?                                                                                          |                                                                                                                                                                                                                |

## Appendix D:

### Symptom frequency by primary diagnosis

| Symptoms     | JIA (%) | Other rheumatology diagnosis (%) | Airways disease (%) | Immunodeficiency disorder (%) | Diabetes (%) | Solid organ or bone marrow transplant (%) | Nephrotic syndrome (%) | Other kidney disease (%) | IBD (%) | Other gastroenterology and hepatology (%) | Malignant haematology & oncology (%) | Neurology (%) | Other (%) |
|--------------|---------|----------------------------------|---------------------|-------------------------------|--------------|-------------------------------------------|------------------------|--------------------------|---------|-------------------------------------------|--------------------------------------|---------------|-----------|
| Fever        | 1.63    | 0.81                             | 0.24                | 0.73                          | 0.16         | 0.41                                      | 0.08                   | 0.08                     | 0.00    | 0.08                                      | 0.57                                 | 0.24          | 0.33      |
| Cough        | 4.80    | 1.54                             | 1.63                | 1.54                          | 0.24         | 1.46                                      | 0.57                   | 0.16                     | 0.08    | 0.00                                      | 0.89                                 | 0.16          | 0.65      |
| SOB          | 1.63    | 0.89                             | 0.65                | 0.65                          | 0.08         | 0.08                                      | 0.16                   | 0.08                     | 0.16    | 0.00                                      | 0.16                                 | 0.08          | 0.81      |
| Sore throat  | 6.02    | 2.28                             | 0.98                | 0.98                          | 0.16         | 0.41                                      | 0.24                   | 0.24                     | 0.49    | 0.33                                      | 0.89                                 | 0.33          | 0.89      |
| Blocked nose | 7.48    | 2.60                             | 1.79                | 1.30                          | 0.49         | 1.30                                      | 0.65                   | 0.41                     | 0.73    | 0.08                                      | 0.57                                 | 0.24          | 1.22      |
| Red eyes     | 4.07    | 2.11                             | 0.57                | 1.14                          | 0.49         | 0.41                                      | 0.49                   | 0.08                     | 0.33    | 0.08                                      | 0.57                                 | 0.16          | 0.57      |
| Headache     | 11.30   | 4.96                             | 1.30                | 2.20                          | 0.98         | 1.54                                      | 0.65                   | 0.33                     | 0.98    | 0.49                                      | 1.87                                 | 0.73          | 1.63      |
| Vomiting     | 3.66    | 0.89                             | 0.33                | 0.65                          | 0.08         | 0.89                                      | 0.24                   | 0.24                     | 0.00    | 0.16                                      | 1.14                                 | 0.08          | 0.98      |
| Diarrhoea    | 4.23    | 1.63                             | 0.57                | 1.46                          | 0.49         | 0.81                                      | 0.33                   | 0.33                     | 0.81    | 0.16                                      | 0.73                                 | 0.24          | 0.73      |
| Joint pain   | 19.84   | 3.98                             | 0.24                | 1.22                          | 0.16         | 1.30                                      | 0.65                   | 0.24                     | 0.81    | 0.08                                      | 1.87                                 | 0.41          | 1.06      |
| Muscle pain  | 8.46    | 3.33                             | 0.57                | 1.22                          | 0.33         | 1.06                                      | 0.65                   | 0.24                     | 0.49    | 0.16                                      | 1.38                                 | 0.33          | 0.81      |
| Fatigue      | 13.98   | 4.07                             | 1.30                | 2.60                          | 0.49         | 1.30                                      | 0.89                   | 0.57                     | 1.30    | 0.49                                      | 3.25                                 | 0.89          | 1.30      |
| Chills       | 2.11    | 1.06                             | 0.08                | 0.49                          | 0.08         | 0.41                                      | 0.08                   | 0.08                     | 0.24    | 0.16                                      | 0.33                                 | 0.33          | 0.24      |

Abbreviations: SOB shortness of breath, JIA juvenile idiopathic arthritis, IBD inflammatory bowel disease

## Symptom frequency by medication

| Symptoms      | Methotrexate (%) | Hydroxychloroquine (%) | Other DMARDs (%) | Corticosteroids (%) | Anti-TNF therapy (%) | Tocilizumab (%) | Other biologic drugs (%) | MMF (%) |
|---------------|------------------|------------------------|------------------|---------------------|----------------------|-----------------|--------------------------|---------|
| Fever         | 4.92             | 9.09                   | 0.92             | 5.62                | 4.62                 | 4.08            | 11.11                    | 5.34    |
| Cough         | 12.44            | 14.55                  | 9.17             | 14.06               | 15.84                | 4.08            | 8.33                     | 15.27   |
| SOB           | 3.11             | 3.64                   | 1.83             | 6.02                | 4.29                 | 8.16            | 5.56                     | 4.58    |
| Sore throat   | 16.06            | 21.82                  | 18.35            | 11.24               | 18.15                | 18.37           | 8.33                     | 10.69   |
| Blocked nose  | 19.69            | 25.45                  | 13.76            | 13.65               | 23.76                | 14.29           | 19.44                    | 17.56   |
| Red eyes      | 12.69            | 10.91                  | 8.26             | 10.44               | 11.55                | 14.29           | 13.89                    | 6.11    |
| Headache      | 29.27            | 45.45                  | 29.36            | 28.11               | 30.69                | 28.57           | 27.78                    | 25.19   |
| Vomiting      | 12.18            | 9.09                   | 4.59             | 12.05               | 8.25                 | 12.24           | 8.33                     | 7.63    |
| Diarrhoea     | 9.84             | 10.91                  | 11.93            | 11.65               | 11.88                | 20.41           | 8.33                     | 12.98   |
| Joint pain    | 43.78            | 43.64                  | 33.03            | 26.91               | 46.20                | 69.39           | 36.11                    | 22.14   |
| Muscle pain   | 20.98            | 41.82                  | 22.02            | 24.50               | 21.45                | 30.61           | 25.00                    | 19.08   |
| Fatigue       | 39.12            | 43.64                  | 29.36            | 34.14               | 34.65                | 40.82           | 38.89                    | 24.43   |
| Chills        | 5.44             | 12.73                  | 5.50             | 7.23                | 6.93                 | 6.12            | 5.56                     | 6.87    |
| Nausea        | 31.09            | 27.27                  | 15.60            | 20.88               | 25.41                | 26.53           | 16.67                    | 15.27   |
| Loss of smell | 0.52             | 1.82                   | 0.00             | 0.80                | 0.33                 | 0.00            | 0.00                     | 1.53    |

Abbreviations: DMARDs disease modifying anti-rheumatic drugs, MMF mycophenolate mofetil

| Symptoms      | Chemotherapy (%) | Azathioprine (%) | Other antibiotics and antivirals (%) | Tacrolimus (%) | Inhalers (%) | Insulin (%) | NSAIDs (%) | IV or SC IG (%) |
|---------------|------------------|------------------|--------------------------------------|----------------|--------------|-------------|------------|-----------------|
| Fever         | 10.29            | 7.35             | 7.14                                 | 3.80           | 8.14         | 3.66        | 9.72       | 2.63            |
| Cough         | 14.71            | 25.00            | 18.45                                | 15.19          | 31.40        | 8.54        | 15.28      | 13.16           |
| SOB           | 5.88             | 8.82             | 5.95                                 | 3.16           | 16.28        | 3.66        | 8.33       | 7.89            |
| Sore throat   | 8.82             | 13.24            | 10.71                                | 6.96           | 18.60        | 7.32        | 13.89      | 0.00            |
| Blocked nose  | 10.29            | 16.18            | 13.69                                | 14.56          | 36.05        | 9.76        | 25.00      | 10.53           |
| Red eyes      | 10.29            | 8.82             | 9.52                                 | 5.70           | 15.12        | 9.76        | 16.67      | 5.26            |
| Headache      | 27.94            | 32.35            | 20.83                                | 18.35          | 32.56        | 25.61       | 44.44      | 15.79           |
| Vomiting      | 22.06            | 10.29            | 14.29                                | 8.86           | 12.79        | 7.32        | 9.72       | 5.26            |
| Diarrhoea     | 14.71            | 10.29            | 13.10                                | 10.13          | 12.79        | 10.98       | 12.50      | 5.26            |
| Joint pain    | 29.41            | 14.71            | 20.24                                | 17.09          | 18.60        | 8.54        | 61.11      | 18.42           |
| Muscle pain   | 23.53            | 11.76            | 17.26                                | 14.56          | 19.77        | 7.32        | 31.94      | 7.89            |
| Fatigue       | 47.06            | 30.88            | 30.36                                | 18.35          | 30.23        | 17.07       | 54.17      | 18.42           |
| Chills        | 7.35             | 2.94             | 4.17                                 | 3.80           | 6.98         | 1.22        | 11.11      | 0.00            |
| Nausea        | 30.88            | 19.12            | 17.86                                | 12.66          | 20.93        | 10.98       | 27.78      | 10.53           |
| Loss of smell | 0.00             | 0.00             | 0.00                                 | 1.27           | 1.16         | 0.00        | 4.17       | 0.00            |

Abbreviations: NSAIDs non-steroid anti-inflammatory drugs, IV intravenous, SC subcutaneous, IG immunoglobulin

STROBE Statement—Checklist of items that should be included in reports of *cohort studies*

|                              | Item No | Recommendation                                                                                                                                                                                                                                                                                                         | Page No |
|------------------------------|---------|------------------------------------------------------------------------------------------------------------------------------------------------------------------------------------------------------------------------------------------------------------------------------------------------------------------------|---------|
| <b>Title and abstract</b>    | 1       | (a) Indicate the study's design with a commonly used term in the title or the abstract                                                                                                                                                                                                                                 | 2       |
|                              |         | (b) Provide in the abstract an informative and balanced summary of what was done and what was found                                                                                                                                                                                                                    | 2       |
| <b>Introduction</b>          |         |                                                                                                                                                                                                                                                                                                                        |         |
| Background/rationale         | 2       | Explain the scientific background and rationale for the investigation being reported                                                                                                                                                                                                                                   | 4       |
| Objectives                   | 3       | State specific objectives, including any prespecified hypotheses                                                                                                                                                                                                                                                       | 4       |
| <b>Methods</b>               |         |                                                                                                                                                                                                                                                                                                                        |         |
| Study design                 | 4       | Present key elements of study design early in the paper                                                                                                                                                                                                                                                                | 4-6     |
| Setting                      | 5       | Describe the setting, locations, and relevant dates, including periods of recruitment, exposure, follow-up, and data collection                                                                                                                                                                                        | 4-6     |
| Participants                 | 6       | (a) Give the eligibility criteria, and the sources and methods of selection of participants. Describe methods of follow-up<br>(b) For matched studies, give matching criteria and number of exposed and unexposed                                                                                                      | 4-6     |
| Variables                    | 7       | Clearly define all outcomes, exposures, predictors, potential confounders, and effect modifiers. Give diagnostic criteria, if applicable                                                                                                                                                                               | 4-6     |
| Data sources/<br>measurement | 8*      | For each variable of interest, give sources of data and details of methods of assessment (measurement). Describe comparability of assessment methods if there is more than one group                                                                                                                                   | 4-6     |
| Bias                         | 9       | Describe any efforts to address potential sources of bias                                                                                                                                                                                                                                                              | 4-6     |
| Study size                   | 10      | Explain how the study size was arrived at                                                                                                                                                                                                                                                                              | 4-6     |
| Quantitative variables       | 11      | Explain how quantitative variables were handled in the analyses. If applicable, describe which groupings were chosen and why                                                                                                                                                                                           | 4-6     |
| Statistical methods          | 12      | (a) Describe all statistical methods, including those used to control for confounding<br>(b) Describe any methods used to examine subgroups and interactions<br>(c) Explain how missing data were addressed<br>(d) If applicable, explain how loss to follow-up was addressed<br>(e) Describe any sensitivity analyses | 4-6     |
| <b>Results</b>               |         |                                                                                                                                                                                                                                                                                                                        |         |
| Participants                 | 13*     | (a) Report numbers of individuals at each stage of study—eg numbers potentially eligible, examined for eligibility, confirmed eligible, included in the study, completing follow-up, and analysed<br>(b) Give reasons for non-participation at each stage<br>(c) Consider use of a flow diagram                        | 6       |
| Descriptive data             | 14*     | (a) Give characteristics of study participants (eg demographic, clinical, social) and information on exposures and potential confounders<br>(b) Indicate number of participants with missing data for each variable of interest<br>(c) Summarise follow-up time (eg, average and total amount)                         | 6-8     |
| Outcome data                 | 15*     | Report numbers of outcome events or summary measures over time                                                                                                                                                                                                                                                         | 6-8     |

|    |                          |    |                                                                                                                                                                                                              |      |
|----|--------------------------|----|--------------------------------------------------------------------------------------------------------------------------------------------------------------------------------------------------------------|------|
| 1  | Main results             | 16 | (a) Give unadjusted estimates and, if applicable, confounder-adjusted estimates and their precision (eg, 95% confidence interval). Make clear which confounders were adjusted for and why they were included | 6-8  |
| 2  |                          |    | (b) Report category boundaries when continuous variables were categorized                                                                                                                                    |      |
| 3  |                          |    | (c) If relevant, consider translating estimates of relative risk into absolute risk for a meaningful time period                                                                                             |      |
| 4  |                          |    |                                                                                                                                                                                                              |      |
| 5  |                          |    |                                                                                                                                                                                                              |      |
| 6  |                          |    |                                                                                                                                                                                                              |      |
| 7  |                          |    |                                                                                                                                                                                                              |      |
| 8  |                          |    |                                                                                                                                                                                                              |      |
| 9  | Other analyses           | 17 | Report other analyses done—eg analyses of subgroups and interactions, and sensitivity analyses                                                                                                               | 6-8  |
| 10 |                          |    |                                                                                                                                                                                                              |      |
| 11 | <b>Discussion</b>        |    |                                                                                                                                                                                                              |      |
| 12 |                          |    |                                                                                                                                                                                                              |      |
| 13 | Key results              | 18 | Summarise key results with reference to study objectives                                                                                                                                                     | 8-10 |
| 14 | Limitations              | 19 | Discuss limitations of the study, taking into account sources of potential bias or imprecision. Discuss both direction and magnitude of any potential bias                                                   | 8-10 |
| 15 |                          |    |                                                                                                                                                                                                              |      |
| 16 | Interpretation           | 20 | Give a cautious overall interpretation of results considering objectives, limitations, multiplicity of analyses, results from similar studies, and other relevant evidence                                   | 11   |
| 17 |                          |    |                                                                                                                                                                                                              |      |
| 18 |                          |    |                                                                                                                                                                                                              |      |
| 19 | Generalisability         | 21 | Discuss the generalisability (external validity) of the study results                                                                                                                                        | 11   |
| 20 |                          |    |                                                                                                                                                                                                              |      |
| 21 | <b>Other information</b> |    |                                                                                                                                                                                                              |      |
| 22 | Funding                  | 22 | Give the source of funding and the role of the funders for the present study and, if applicable, for the original study on which the present article is based                                                | 12   |
| 23 |                          |    |                                                                                                                                                                                                              |      |
| 24 |                          |    |                                                                                                                                                                                                              |      |

\*Give information separately for exposed and unexposed groups.

**Note:** An Explanation and Elaboration article discusses each checklist item and gives methodological background and published examples of transparent reporting. The STROBE checklist is best used in conjunction with this article (freely available on the Web sites of PLoS Medicine at <http://www.plosmedicine.org/>, Annals of Internal Medicine at <http://www.annals.org/>, and Epidemiology at <http://www.epidem.com/>). Information on the STROBE Initiative is available at <http://www.strobe-statement.org>.
