# Supplementary material for: COVID-19 symptom surveillance in immunocompromised children and young people in the UK: a prospective observational cohort study
Source: PubMed Central journal article supplement — BMJ Open. 2021 Mar 17;11(3):e044899. doi: 10.1136/bmjopen-2020-044899 (PMC7977081; doi:10.1136/bmjopen-2020-044899), 2021-03-17
Supplement: bmjopen-2020-044899supp001.pdf [file bmjopen-2020-044899supp001.pdf]

## Appendix A: List of ImmunoCOVID19 Study Group Co-authors

|      |                         |                                                         |                                                                                                                                                                            |                                                                                                                  |
|------|-------------------------|---------------------------------------------------------|----------------------------------------------------------------------------------------------------------------------------------------------------------------------------|------------------------------------------------------------------------------------------------------------------|
| Dr   | Hesham Abdalla          | Consultant Paediatrician                                | Walsall Healthcare NHS Trust                                                                                                                                               | Moat Road, Walsall WS2 9PA                                                                                       |
| Ms   | Daniella Adams          | Clinical Nurse Specialist<br>Paediatric<br>Rheumatology | Evelina London Children's Hospital, Guy's and St Thomas' NHS Foundation Trust                                                                                              | Westminster Bridge Road London, SE1 7EH                                                                          |
| Dr   | Nadeem A Afzal          | Consultant Paediatric<br>Gastroenterologist             | Department of Paediatric Gastroenterology, Southampton Children's Hospital                                                                                                 | Tremona Road, Southampton, SO16 6YD                                                                              |
| Mr   | Nicolas Aldridge        | Lead Nurse R and D                                      | Birmingham Women's and Children's Hospital and University Hospital Coventry and Warwickshire                                                                               | 2nd Floor, PRI suit, UHCW, Clifford Bridge Road, CV2 2DX                                                         |
| Dr   | Paola Angelini          | Consultant Paediatric<br>Oncology                       | Royal Marsden Hospital                                                                                                                                                     | Downs Road, Sutton, SM2 7HE                                                                                      |
| Dr   | Kate Armon              | Paediatric<br>Rheumatologist                            | Paediatric Department, Addenbrookes hospital, Cambridge                                                                                                                    | Box 267 Children's Services, Biomedical Campus, Hills Road, Cambridge CB2 0QQ                                    |
| Dr   | James Ashton            | Clinical Research Fellow<br>in Paediatric IBD           | Human Genetics and Genomic Medicine, University of Southampton, Department of Paediatric Gastroenterology, Southampton Children's Hospital                                 | Tremona Road, Southampton, SO16 6YD                                                                              |
| Mrs  | Helen Baker             | Data Manager                                            | Paediatric Oncology and Haematology, Cambridge University Hospitals NHS Foundation Trust                                                                                   | Hills Road, Cambridge, CB2 0QQ                                                                                   |
| Mrs  | Nicola Balatoni         | Research Nurse                                          | Leeds Children Hospital                                                                                                                                                    | Leeds Teaching Hospital NHS Trust, Great George Street, LS1 3EX                                                  |
| Dr   | Jed Bamber              | Consultant Paediatrician                                | NHS Dumfries and Galloway                                                                                                                                                  | Dumfries & Galloway Royal Infirmary, Cargenbridge, Dumfries, DG2 8RX                                             |
| Mrs  | Alison Barratt          | Paediatric Clinical<br>Research Nurse                   | Royal United Hospitals Bath NHS Foundation Trust                                                                                                                           | Combe Park, Bath, BA1 3NG                                                                                        |
| Mrs  | Charlene Bass-Woodcock  | Paediatric<br>Rheumatology Clinical<br>Nurse Specialist | Bradford Teaching Hospitals NHS Foundation Trust                                                                                                                           | Duckworth Lane, Bradford, West Yorkshire, BD9 6RJ                                                                |
| Dr   | Jessica Bate            | Consultant Paediatric<br>Oncology                       | Department of Paediatric Oncology, University Hospital Southampton NHS Foundation Trust                                                                                    | Tremona Road, Southampton, SO16 6YD                                                                              |
| Dr   | Akshay Batra            | Consultant Paediatric<br>Gastroenterologist             | Department of Paediatric Gastroenterology, Southampton Children's Hospital                                                                                                 | Tremona Road, Southampton, SO16 6YD                                                                              |
| Prof | R Mark Beattie          | Consultant Paediatric<br>Gastroenterologist             | Department of Paediatric Gastroenterology, Southampton Children's Hospital                                                                                                 | Tremona Road, Southampton, SO16 6YD                                                                              |
| Dr   | Rumena Begum            | Research Coordinator                                    | Great Ormond Street Hospital for Children NHS Foundation Trust                                                                                                             | Great Ormond Street, London WC1N 3JH                                                                             |
| Miss | Claire Bell             | Paediatric Research<br>Nurse                            | University Hospital Crosshouse                                                                                                                                             | Kilmarnock, KA2 0BE                                                                                              |
| Ms   | Kathryn Bell            | Research Nurse                                          | Great North Children's Hospital                                                                                                                                            | Royal Victoria Infirmary, Newcastle upon Tyne, NE1 4LP                                                           |
| Dr   | Georgina Bird-Lieberman | Paediatric Neurology<br>Consultant                      | University Hospital Southampton NHS Foundation Trust                                                                                                                       | Tremona Road, Southampton, SO16 6YD                                                                              |
| Ms   | Helen Blackburn         | Research and<br>Innovation Manager                      | Royal Manchester Children's Hospital, Manchester University Hospitals NHS Trust,                                                                                           | Royal Manchester Children's Hospital, Manchester University Hospitals NHS Trust, Oxford Rd Manchester M13 9WL UK |
| Dr   | Mary Brennan            | Consultant Paediatric<br>Rheumatologist                 | Royal Hospital for Sick Children, Edinburgh                                                                                                                                | 9 Sciennes Road, Edinburgh, EH1 9LF                                                                              |
| Ms   | Francesca Brewer        | Research sister :<br>Paediatrics and<br>Neonates        | Birmingham Women's and Children's Hospital and University Hospital Coventry and Warwickshire                                                                               | R&D Clinical Trials Office, 3rd Floor, West wing, UHCW, Clifford Bridge, CV2 2DX                                 |
| Mrs  | Marlene Brito           | Clinical Trials Assistant                               | Department of Paediatric Oncology, University Hospital Southampton NHS Foundation Trust and Faculty of Medicine and Institute for Life Sciences, University of Southampton | Tremona Road, Southampton, SO16 6YD                                                                              |
| Dr   | Richard Brough          | Consultant urologist and<br>urological cancer lead      | The Shrewsbury and Telford Hospital NHS Trust                                                                                                                              | Mytton Oak Road, Shrewsbury, Shropshire, SY3 8XQ                                                                 |

|      |                      |                                                                  |                                                                                                                                                                                                                                        |                                                                                |
|------|----------------------|------------------------------------------------------------------|----------------------------------------------------------------------------------------------------------------------------------------------------------------------------------------------------------------------------------------|--------------------------------------------------------------------------------|
| Dr   | Susan Byrne          | Paediatric Neurology Consultant                                  | Evelina London Children' Hospital                                                                                                                                                                                                      | Westminster Bridge Road, London, SE1 7EH                                       |
| Dr   | Katrina Cathie       | Consultant General Paediatrics and Paediatric Research           | University Hospital Southampton NHS Foundation Trust                                                                                                                                                                                   | Tremona Road, Southampton, SO16 6YD                                            |
| Dr   | John Chapman         | Consultant Paediatrician                                         | James Paget University Hospital                                                                                                                                                                                                        | Lowestoft Rd, Gorleston, NR31 6LA                                              |
| Dr   | Anne-Marie Child     | Consultant Paediatric Neurologist                                | Leeds Children Hospital                                                                                                                                                                                                                | Leeds Teaching Hospital NHS Trust, Great George Street, LS1 3EX                |
| Dr   | Coziana Ciurtin      | Consultant Adolescent Rheumatology                               | Centre for Adolescent Rheumatology Versus Arthritis, University College London                                                                                                                                                         | 3rd Floor Central, 250 Euston Road, London, NW1 2PG                            |
| Dr   | Sheila Clark         | Consultant dermatology                                           | Leeds Children Hospital                                                                                                                                                                                                                | Leeds Teaching Hospital NHS Trust, Great George Street, LS1 3EX                |
| Dr   | Tracy Coelho         | Consultant Paediatric Gastroenterologist                         | Department of Paediatric Gastroenterology, Southampton Children's Hospital                                                                                                                                                             | Tremona Road, Southampton, SO16 6YD                                            |
| Dr   | William Coles        | Consultant Paediatric Rheumatologist                             | Birmingham Women's and Children's Hospital and University Hospital Coventry and Warwickshire                                                                                                                                           | Paediatric Rheumatology, Paediatric Department, UHCW, Clifford Bridge, CV2 2DX |
| Mrs  | Heather Collier      | Research Nurse                                                   | East Lancs NHS Trust                                                                                                                                                                                                                   | Haslingden Road, Blackburn, BB2 3HH                                            |
| Dr   | Gary Connett         | Paediatric Respiratory Consultant                                | University Hospital Southampton NHS Foundation Trust                                                                                                                                                                                   | Tremona Road, Southampton, SO16 6YD                                            |
| Dr   | Philip Connor        | Consultant Paediatric Haematology                                | Noah's Ark Children's Hospital For Wales                                                                                                                                                                                               | Rm 1F31 Cardigan House, UHW, Cardiff, CF14 4XW                                 |
| Dr   | Michael Cosgrove     | Consultant Paediatric Gastroenterologist                         | Morrison Hospital, Swansea Bay University Health Board                                                                                                                                                                                 | Swansea, SA6 6NL                                                               |
| Ms   | Gillian Coyle        | Clinical Nurse Specialist                                        | Royal Hospital for Sick Children, Edinburgh                                                                                                                                                                                            | 9 Sciennes Road, Edinburgh, EH1 9LF                                            |
| Dr   | Brian Davidson       | Consultant Rheumatologist                                        | University Hospital Southampton NHS Foundation Trust                                                                                                                                                                                   | Tremona Road, Southampton, SO16 6YD                                            |
| Mrs  | Matthew Davies       | Data Manager                                                     | Department of Neonatal Medicine, University Hospital Southampton NHS Foundation Trust                                                                                                                                                  |                                                                                |
| Mrs  | Sharon Davies-Dear   | Clinical Trials Project Manager                                  | R&D, University Hospital Southampton NHS Foundation Trust                                                                                                                                                                              | Tremona Road, Southampton, SO16 6YD                                            |
| Dr   | Christian De Goede   | Consultant Paediatric Neurologist                                | Department of Child Health, Lancashire Teaching Hospitals NHS Trusts                                                                                                                                                                   | Royal Preston Hospital, Sharoe Green Lane, Preston PR2 9HT                     |
| Dr   | Hans de Graaf        | Consultant Paediatric Rheumatology                               | NIHR Southampton Clinical Research Facility and Paediatric Medicine, University Hospital Southampton NHS Foundation Trust                                                                                                              | Tremona Road, Southampton, SO16 6YD                                            |
| Dr   | Samundeeswari Deepak | Consultant Paediatric and Adolescent rheumatology                | Nottingham Children's Hospital, Queen's Medical Centre, Nottingham University Hospitals NHS Trust                                                                                                                                      | Derby Road, Nottingham, NG72UH                                                 |
| Mr   | Fatjon Dekaj         | CLUSTER Research Coordinator                                     | Infection, Immunity and Inflammation Research & Teaching Department, University College London Great Ormond Street Institute of Child Health                                                                                           | 30 Guilford Street, London, WC1N 1EH                                           |
| Miss | Sarah Diment         | Paediatric Research Nurse                                        | Salisbury District Hospital                                                                                                                                                                                                            | Salisbury, Wiltshire, SP2 8BJ                                                  |
| Dr   | Corine Driessens     | Research Fellow                                                  | University of Southampton, Faculty of Medicine, Clinical and Experimental Sciences                                                                                                                                                     | Tremona Road, Southampton, SO16 6YD                                            |
| Dr   | Simon B Drysdale     | Consultant in Paediatric Infectious Diseases and Immunology      | Paediatric Infectious Diseases Research Group, St George's, University of London and St George's University Hospitals NHS Foundation Trust                                                                                             | Cranmer Terrace, London, SW17 0RE                                              |
| Dr   | Martin Elliott       | Consultant paediatric Oncology                                   | Leeds Children Hospital                                                                                                                                                                                                                | Leeds Teaching Hospital NHS Trust, Great George Street, LS1 3EX                |
| Prof | Marieke Emonts       | Consultant Paediatric Infectious Diseases & Immunology, Honorary | Newcastle Hospitals NHS Foundation Trust; Translational and Clinical Research Institute, Newcastle University, and NIHR Newcastle Biomedical Research Centre based at Newcastle upon Tyne Hospitals NHS Trust and Newcastle University | Royal Victoria Hospital, Queen Victoria Road, Newcastle upon Tyne. NE1 4LP     |

|      |                         |                                                                           |                                                                                                                                                                                                                                      |                                                                                                         |
|------|-------------------------|---------------------------------------------------------------------------|--------------------------------------------------------------------------------------------------------------------------------------------------------------------------------------------------------------------------------------|---------------------------------------------------------------------------------------------------------|
|      |                         | Professor Paediatric Infectious Diseases                                  |                                                                                                                                                                                                                                      |                                                                                                         |
| Dr   | Mich Erlewyn-Lajeunesse | Consultant Paediatric Allergy and Immunology                              | University Hospital Southampton NHS Foundation Trust                                                                                                                                                                                 | Tremona Road, Southampton, SO16 6YD                                                                     |
| Dr   | Hazel Evans             | Paediatric Respiratory Consultant                                         | University Hospital Southampton NHS Foundation Trust                                                                                                                                                                                 | Tremona Road, Southampton, SO16 6YD                                                                     |
| Mrs  | Tracey Farnon           | Paediatric Consultant                                                     | Salisbury District Hospital                                                                                                                                                                                                          | Salisbury, Wiltshire, SP2 8BJ                                                                           |
| Prof | Saul Faust              | Professor of Paediatric Immunology and Infectious Diseases                | NIHR Southampton Clinical Research Facility and NIHR Southampton Biomedical Research Centre, University Hospital Southampton NHS Foundation Trust and Faculty of Medicine and Institute for Life Sciences, University of Southampton | Tremona Road, Southampton, SO16 6YD                                                                     |
| Dr   | Susanna Felsenstein     | Consultant Paediatric Infectious Diseases                                 | Alder Hey Children's Hospital                                                                                                                                                                                                        | Liverpool, East Prescott Rd L14 5AB                                                                     |
| Ms   | Lynsey Felton           | Paediatric Research Nurse                                                 | James Paget University Hospital                                                                                                                                                                                                      | Lowestoft Rd, Gorleston, NR31 6LA                                                                       |
| Dr   | Matthew Fenton          | Consultant Paediatric Cardiologist                                        | Great Ormond Street Hospital for Children NHS Foundation Trust                                                                                                                                                                       | Great Ormond Street, London WC1N 3JH                                                                    |
| Dr   | Katy Fidler             | Clinical Senior Lecturer in Paediatric Infectious Diseases and Immunology | Academic Dept of Paediatrics, Brighton and Sussex Medical School, University of Sussex                                                                                                                                               | N - S Rd, Falmer, Brighton BN1 9PX                                                                      |
| Mrs  | Debbie Fisher           | Trial Coordinator                                                         | Paediatric Oncology and Haematology, Cambridge University Hospitals NHS Foundation Trust                                                                                                                                             | Hills Road, Cambridge, CB2 0QQ                                                                          |
| Dr   | Peter W Fowlie          | Consultant Paediatrician                                                  | Ninewells Hospital and Medical School                                                                                                                                                                                                | Dundee, DD1 9SY                                                                                         |
| Mrs  | Kirsty Galvin           | Lead Nurse                                                                | Children's Community Nursing Team, Kent community Health Foundation Trust                                                                                                                                                            | Trinity House, 110-12- Upper Pemberton, Kennington, Ashford, Kent, TN25 4AZ                             |
| Ms   | Emma Gardiner           | Research Nurse                                                            | University Hospital Lewisham                                                                                                                                                                                                         | Paediatric Offices, Nockold House, University Hospital Lewisham, Lewisham High street, London, SE13 6LH |
| Dr   | Edward Gaynor           | Paediatric Gastroenterology Consultant                                    | Great Ormond Street Hospital for Children NHS Foundation Trust                                                                                                                                                                       | Great Ormond Street, London WC1N 3JH                                                                    |
| Dr   | Diane Gbesemete         | Clinical Research Fellow                                                  | NIHR Southampton Clinical Research Facility and NIHR Southampton Biomedical Research Centre, University Hospital Southampton NHS Foundation Trust and Faculty of Medicine and Institute for Life Sciences, University of Southampton | Tremona Road, Southampton, SO16 6YD                                                                     |
| Dr   | Rodney Gilbert          | Consultant Paediatric Nephrologist                                        | University Hospital Southampton NHS Foundation Trust                                                                                                                                                                                 | Tremona Road, Southampton, SO16 6YD                                                                     |
| Dr   | Francis J Gilchrist     | Paediatric Respiratory Consultant                                         | University Hospitals of North Midlands NHS Trust                                                                                                                                                                                     | Staffordshire Children's Hospital at Royal Stoke, Newcastle Road, Stoke on Trent, ST4 6QG               |
| Mrs  | Clare Gilmour           | Immunology Clinical Nurse Specialist                                      | St George's University Hospitals NHS Foundation Trust                                                                                                                                                                                | Cranmer Terrace, London, SW17 0RE                                                                       |
| Ms   | Claire Glemas           | Research Nurse                                                            | Paediatric Gastroenterology, Cambridge University Hospitals NHS Foundation Trust                                                                                                                                                     | Hills Road, Cambridge, CB2 0QQ                                                                          |
| Dr   | Emma Grainger-Allen     | Consultant Paediatric Allergy and Immunology                              | University Hospital Southampton NHS Foundation Trust                                                                                                                                                                                 | Tremona Road, Southampton, SO16 6YD                                                                     |
| Dr   | Juliet Gray             | Associate Professor and Consultant in Paediatric Oncology                 | Department of Paediatric Oncology, University Hospital Southampton NHS Foundation Trust and Faculty of Medicine and Institute for Life Sciences, University of Southampton                                                           | Tremona Road, Southampton, SO16 6YD                                                                     |
| Ms   | Donna Griffiths         | Paediatric Research Nurse                                                 | James Paget University Hospital                                                                                                                                                                                                      | Lowestoft Rd, Gorleston, NR31 6LA                                                                       |
| Mrs  | Rowena Guermech         | Research Nurse                                                            | Paediatric Oncology and Haematology, Cambridge University Hospitals NHS Foundation Trust                                                                                                                                             | Hills Road, Cambridge, CB2 0QQ                                                                          |
| Mr   | Neil Hall               | Research Nurse                                                            | Leeds Children Hospital                                                                                                                                                                                                              | Leeds Teaching Hospital NHS Trust, Great George Street, LS1 3EX                                         |

|      |                      |                                                               |                                                                                                                                                                            |                                                                                                                  |
|------|----------------------|---------------------------------------------------------------|----------------------------------------------------------------------------------------------------------------------------------------------------------------------------|------------------------------------------------------------------------------------------------------------------|
| Miss | Nicola Hamilton      | Paediatric Rheumatology Link Nurse                            | NHS Forth Valley                                                                                                                                                           | Forth Valley Royal Hospital, Stirling Road, Larbert FK5 4WR                                                      |
| Mrs  | Joanna Hancock       | Clinical Nurse Specialist                                     | University Hospital Southampton NHS Foundation Trust                                                                                                                       | Tremona Road, Southampton, SO16 6YD                                                                              |
| Dr   | Mushfequr R Haq      | Consultant Paediatric Nephrologist                            | University Hospital Southampton NHS Foundation Trust                                                                                                                       | Tremona Road, Southampton SO16 6YD                                                                               |
| Mrs  | Amanda Harris        | PCD & Children's Respiratory Clinical Nurse Specialist        | NIHR Southampton Biomedical Research Centre, University Hospital Southampton NHS Foundation Trust                                                                          |                                                                                                                  |
| Dr   | Kathryn Harrison     | Consultant Paediatric & Adolescent Rheumatology               | Rheumatology Department, Birmingham Children's Hospital, Birmingham Women's and Children's NHS Foundation Trust                                                            | Steelhouse Lane, Birmingham B4 6NH                                                                               |
| Ms   | Rebecca Harrop       | Data Manager                                                  | Great North Children's Hospital                                                                                                                                            | Royal Victoria Infirmary, Newcastle upon Tyne, NE1 4LP                                                           |
| Miss | Sarah Hartfree       | Paediatric Rheumatology Clinical Nurse Specialist             | University Hospital Southampton NHS Foundation Trust                                                                                                                       | Tremona Road, Southampton SO16 6YD                                                                               |
| Mrs  | Laura Hennelly       | Adolescent Research Nurse                                     | Centre for Adolescent Rheumatology Versus Arthritis, University College London                                                                                             | 3rd Floor Central, 250 Euston Road, London, NW1 2PG                                                              |
| Dr   | Avni Hindocha        | Paediatric trainee                                            | Royal Manchester Children's Hospital, Manchester University Hospitals NHS Trust,                                                                                           | Royal Manchester Children's Hospital, Manchester University Hospitals NHS Trust, Oxford Rd Manchester M13 9WL UK |
| Dr   | John Ho              | Consultant Paediatrician                                      | Whipps Cross University Hospital, London                                                                                                                                   | Whipps Cross Road, Leytonstone, London, E11 1NR                                                                  |
| Mrs  | Ruth Howman          | Clinical Research Sister                                      | Birmingham Children's Hospital, Birmingham Women's and Children's NHS Foundation Trust                                                                                     | Steelhouse Lane, Birmingham B4 6NH                                                                               |
| Ms   | Camilla Huber        | Research & Development                                        | Birmingham Women's Hospital, Birmingham Women's and Children's NHS Foundation Trust                                                                                        | Mindelsohn Way, Birmingham B15 2TG                                                                               |
| Dr   | Marjorie Illingworth | Paediatric Neurology Consultant                               | University Hospital Southampton NHS Foundation Trust                                                                                                                       | Tremona Road, Southampton, SO16 6YD                                                                              |
| Dr   | Winnie Ip            | Honorary Senior Lecturer & Consultant Paediatric Immunologist | Great Ormond Street Hospital for Children NHS Foundation Trust, Molecular and Cellular Immunology, University College London Great Ormond Street Institute of Child Health | Great Ormond Street, London WC1N 3JH, 30 Guilford Street, London, WC1N 1EH                                       |
| Dr   | Javed Iqbal          | Consultant Paediatrician                                      | East Lancs NHS Trust                                                                                                                                                       | Haslingden Road, Blackburn, BB2 3HH                                                                              |
| Dr   | Mark J Johnson       | Consultant Neonatologist                                      | Department of Neonatal Medicine, University Hospital Southampton NHS Foundation Trust, NIHR Biomedical Research Centre, University of Southampton                          | Tremona Road, Southampton, SO16 6YD                                                                              |
| Dr   | Christine E Jones    | Consultant Paediatric Infectious Diseases                     | University Hospital Southampton NHS Foundation Trust                                                                                                                       | Tremona Road, Southampton, SO16 6YD                                                                              |
| Mr   | James Jones          | Paediatric Research Nurse                                     | The Shrewsbury and Telford Hospital NHS Trust                                                                                                                              | Mytton Oak Road, Shrewsbury, Shropshire, SY3 8XQ                                                                 |
| Dr   | Jochen Kammermeier   | Consultant Paediatric Gastroenterologist                      | Evelina London Children's Hospital                                                                                                                                         | Westminster Bridge Road London SE1 7EH                                                                           |
| Dr   | Dagmar Kastner-Cole  | Consultant Paediatrician                                      | Tayside Children's Hospital, Ninewells Hospital and Medical School                                                                                                         | Dundee, DD1 9SY                                                                                                  |
| Dr   | Akhila Kavirayani    | Consultant Paediatric Rheumatology                            | Oxford University Hospitals NHS Foundation Trust                                                                                                                           | Nuffield Orthopaedic Centre, Oxford, OX3 7HE                                                                     |
| Prof | Deirdre Kelly        | Consultant Paediatric Hepatologist                            | Liver Unit, Birmingham Women's & Children's NHS Foundation Trust, University of Birmingham                                                                                 | Steelhouse Lane, Birmingham B4 6NH, Edgbaston, Birmingham B15 2TT                                                |
| Ms   | Imogen Kelly         | Clinical Nurse Specialist                                     | Royal Hospital for Sick Children, Edinburgh                                                                                                                                | 9 Sciennes Road, Edinburgh, EH1 9LF                                                                              |
| Dr   | Ciara Kennedy        | Clinical Trials Coordinator                                   | Great North Children's Hospital                                                                                                                                            | Royal Victoria Infirmary, Newcastle upon Tyne, NE1 4LP                                                           |
| Dr   | Larissa Kerecuk      | Clinical Research Specialty Lead Paediatrics, NIHR CRN        | Birmingham Children's Hospital, Birmingham Women's and Children's NHS Foundation Trust                                                                                     | Steelhouse Lane, Birmingham B4 6NH                                                                               |

|      |                  |                                                                      |                                                                                                                                                                                                                                                                                                               |                                                                                                                  |
|------|------------------|----------------------------------------------------------------------|---------------------------------------------------------------------------------------------------------------------------------------------------------------------------------------------------------------------------------------------------------------------------------------------------------------|------------------------------------------------------------------------------------------------------------------|
|      |                  | West Midlands, Consultant Paediatric Nephrologist                    |                                                                                                                                                                                                                                                                                                               |                                                                                                                  |
| Mr   | Charles Keys     | Consultant Paediatric Surgery                                        | University Hospital Southampton NHS Foundation Trust                                                                                                                                                                                                                                                          | Tremona Road, Southampton, SO16 6YD                                                                              |
| Miss | Aline Kimonyo    | Research Coordinator                                                 | University College London Great Ormond Street Institute of Child Health                                                                                                                                                                                                                                       | UCL Great Ormond Street Institute of Child Health 30 Guilford Street London WC1N 1EH                             |
| Mrs  | Sharon King      | Research Nurse                                                       | Great North Children's Hospital                                                                                                                                                                                                                                                                               | Royal Victoria Infirmary, Newcastle upon Tyne, NE1 4LP                                                           |
| Mrs  | Vicky King       | Clinical Trials Practitioner                                         | Salisbury District Hospital                                                                                                                                                                                                                                                                                   | Salisbury, Wiltshire, SP2 8BJ                                                                                    |
| Dr   | Fenella Kirkham  | Paediatric Neurology Consultant                                      | University Hospital Southampton NHS Foundation Trust                                                                                                                                                                                                                                                          | Tremona Road, Southampton, SO16 6YD                                                                              |
| Dr   | Alice Leahy      | Consultant Paediatric Rheumatologist                                 | University Hospital Southampton NHS Foundation Trust                                                                                                                                                                                                                                                          | Tremona Road, Southampton SO16 6YD                                                                               |
| Ms   | Gemma Lee        | Clinical Nurse Specialist – Paediatric IBD                           | Evelina London Children's Hospital                                                                                                                                                                                                                                                                            | Westminster Bridge Road London SE1 7EH                                                                           |
| Dr   | Julian Legg      | Paediatric Respiratory Consultant                                    | University Hospital Southampton NHS Foundation Trust                                                                                                                                                                                                                                                          | Tremona Road, Southampton, SO16 6YD                                                                              |
| Dr   | Valentina Leone  | Consultant Paediatric Rheumatology                                   | Leeds Children Hospital                                                                                                                                                                                                                                                                                       | Leeds Teaching Hospital NHS Trust, Great George Street, LS1 3EX                                                  |
| Dr   | Derek Lim        | Consultant Clinical Geneticist                                       | Clinical Genetics Department, West Midlands Regional Genetics Service, Birmingham Women's and Children's Hospital NHS Foundation Trust                                                                                                                                                                        | Mindelsohn Way, Birmingham B15 2TG                                                                               |
| Mrs  | Adine Logan      | Research Nurse                                                       | East Lancs NHS Trust                                                                                                                                                                                                                                                                                          | Haslingden Road, Blackburn, BB2 3HH                                                                              |
| Prof | Jane Lucas       | Professor of Paediatric Respiratory Medicine                         | PCD Centre, School of Clinical and Experimental Sciences, Faculty of Medicine and Institute for Life Sciences, University of Southampton, NIHR Southampton Biomedical Research Centre, University Hospital Southampton NHS Foundation Trust;                                                                  | Tremona Road, Southampton SO16 6YD                                                                               |
| Dr   | David Lynn       | Consultant Paediatrician                                             | NHS Forth Valley                                                                                                                                                                                                                                                                                              | Forth Valley Royal Hospital, Stirling Road, Larbert FK5 4WR                                                      |
| Mrs  | Susan Macfarlane | Paediatric Research Nurse                                            | Scottish Paediatric Research Network, Ninewells Hospital and Medical School                                                                                                                                                                                                                                   | Dundee, DD1 9SY                                                                                                  |
| Ms   | Lydia Makusha    | Neurology Specialist Nurse                                           | Neurology Specialist Nurse, Neurology Department, Birmingham Children's Hospital, Birmingham Women's and Children's NHS Foundation Trust                                                                                                                                                                      | Steelhouse Lane, Birmingham B4 6NH                                                                               |
| Dr   | Gulshan A Malik  | Consultant Paediatrician                                             | Royal Aberdeen Children hospital                                                                                                                                                                                                                                                                              | Westburn road, Aberdeen Scotland, AB25 2ZG                                                                       |
| Dr   | Stephen D Marks  | Reader and Consultant in Paediatric Nephrology                       | NIHR Great Ormond Street Hospital Biomedical Research Centre, University College London Great Ormond Street Institute of Child Health                                                                                                                                                                         | 30 Guilford Street, London WC1N 1EH                                                                              |
| Dr   | Vergheese Mathew | Consultant Paediatrician                                             | Hull University Teaching Hospitals NHS Trust                                                                                                                                                                                                                                                                  | Anlaby Road, Hull, HU3 2JZ                                                                                       |
| Dr   | Janet E McDonagh | Senior Lecturer in Paediatric and Adolescent Rheumatology            | Versus Arthritis Centre for Epidemiology; Centre for MSK Research, University of Manchester; NIHR Biomedical Research Centre, Manchester University Hospital NHS Trust; Department of Paediatric and Adolescent Rheumatology, Royal Manchester Children's Hospital, Manchester University Hospitals NHS Trust | Centre for MSK Research, Stopford Building, University of Manchester Oxford Rd Manchester M13 9PT                |
| Dr   | Flora McErlane   | Consultant Paediatric Rheumatologist and Associate Clinical Lecturer | Newcastle Hospitals NHS Foundation Trust and Institute of Health and Society, Newcastle University                                                                                                                                                                                                            | Royal Victoria Hospital, Queen Victoria Road, Newcastle upon Tyne. NE1 4LP                                       |
| Mrs  | Ann McGovern     | Senior Clinical Research Practitioner in Rheumatology                | Royal Manchester Children's Hospital, Manchester University Hospitals NHS Trust,                                                                                                                                                                                                                              | Royal Manchester Children's Hospital, Manchester University Hospitals NHS Trust, Oxford Rd Manchester M13 9WL UK |

|      |                      |                                                          |                                                                                                                                                                                                                                      |                                                                                                         |
|------|----------------------|----------------------------------------------------------|--------------------------------------------------------------------------------------------------------------------------------------------------------------------------------------------------------------------------------------|---------------------------------------------------------------------------------------------------------|
| Ms   | Karen McIntyre       | Paediatric Specialist Nurse                              | Ninewells Hospital and Medical School                                                                                                                                                                                                | Dundee, DD1 9SY                                                                                         |
| Dr   | Ross McLean          | Specialty Doctor in Paediatrics                          | NHS Lanarkshire                                                                                                                                                                                                                      | Kirklands, Fallside Road. Bothwell, G71 8BB                                                             |
| Dr   | Paddy McMaster       | Consultant in Paediatric Infectious Diseases             | North Manchester General Hospital                                                                                                                                                                                                    | Delaunays Road, Manchester, M8 5RB                                                                      |
| Dr   | Nabil Melhem         | Consultant Paediatric Nephrologist                       | Department of Paediatric Nephrology, Evelina London Children's Hospital, Guy's & St. Thomas' Foundation Hospitals NHS Trust                                                                                                          | Westminster Bridge Road, London, SE1 7EH, UK                                                            |
| Ms   | Dawn Metcalfe        | Clinical Trials Associate                                | Great North Children's Hospital                                                                                                                                                                                                      | Royal Victoria Infirmary, Newcastle upon Tyne, NE1 4LP                                                  |
| Ms   | Danielle Miller      | Children's Research Nurse                                | Oxford University Hospitals NHS Foundation Trust                                                                                                                                                                                     | John Radcliff hospital, WWLG1 room 10.15, Oxford, OX3 9DU                                               |
| Ms   | Lynne Mills          | Information Analyst Advanced                             | NIHR Southampton Clinical Research Facility, University Hospital Southampton NHS Foundation Trust                                                                                                                                    | Tremona Road, Southampton, SO16 6YD                                                                     |
| Ms   | Lisa Moyes           | Paediatric Research Practitioner                         | Nottingham Children's Hospital, Queen's Medical Centre, Nottingham University Hospitals NHS Trust                                                                                                                                    | Derby Road, Nottingham, NG72UH                                                                          |
| Dr   | Alasdair Munro       | Clinical Research Fellow                                 | NIHR Southampton Clinical Research Facility and NIHR Southampton Biomedical Research Centre, University Hospital Southampton NHS Foundation Trust and Faculty of Medicine and Institute for Life Sciences, University of Southampton | Tremona Road, Southampton, SO16 6YD                                                                     |
| Miss | Olivia Murphy-Parry  | Paediatric Rheumatology Clinical Nurse Specialist        | University Hospital Southampton NHS Foundation Trust                                                                                                                                                                                 | Tremona Road, Southampton SO16 6YD                                                                      |
| Dr   | Mohamed Mutalib      | Consultant paediatric gastroenterologist                 | Evelina London Children' Hospital                                                                                                                                                                                                    | Westminster Bridge Road, London< SE1 7EH                                                                |
| Dr   | Arvind Nagra         | Consultant Paediatric Nephrologist                       | University Hospital Southampton NHS Foundation Trust                                                                                                                                                                                 | Tremona Road, Southampton SO16 6YD                                                                      |
| Dr   | Sarveshni Naidoo     | Consultant General Paediatrics                           | NHS Lanarkshire                                                                                                                                                                                                                      | Kirklands, Fallside Road. Bothwell, G71 8BB                                                             |
| Dr   | Gary Nicolin         | Consultant Paediatric Oncology                           | University Hospital Southampton NHS Foundation Trust                                                                                                                                                                                 | Tremona Road, Southampton, SO16 6YD                                                                     |
| Dr   | Maggie Nyirenda      | Consultant Paediatrician                                 | University Hospital Lewisham                                                                                                                                                                                                         | Paediatric Offices, Nockold House, University Hospital Lewisham, Lewisham High street, London, SE13 6LH |
| Mrs  | Grainne O'Connor     | Senior Paediatric Research Nurse                         | North Manchester General Hospital                                                                                                                                                                                                    | Delaunays Road, Manchester, M8 5RB                                                                      |
| Dr   | Sian O'Riordan       | Consultant Paediatric Immunology and Infectious Diseases | Leeds Children Hospital                                                                                                                                                                                                              | Leeds Teaching Hospital NHS Trust, Great George Street, LS1 3EX                                         |
| Dr   | Briget Oates         | Paediatric Consultant                                    | University Hospital Crosshouse                                                                                                                                                                                                       | Kilmarnock, KA2 0BE                                                                                     |
| Dr   | Daniel Owens         | Clinical Research Fellow                                 | NIHR Southampton Clinical Research Facility and NIHR Southampton Biomedical Research Centre, University Hospital Southampton NHS Foundation Trust and Faculty of Medicine and Institute for Life Sciences, University of Southampton | Tremona Road, Southampton, SO16 6YD                                                                     |
| Ms   | Krishna Panchal      | Clinical Trials Support Officer                          | Research Department, Lancashire Teaching Hospitals NHS Trusts                                                                                                                                                                        | Royal Preston Hospital, Sharoe Green Lane, Preston PR2 9HT                                              |
| Ms   | Sharon Parkes        | Nephrology and Rare Disease Research Coordinator         | Nephrology and Rare Disease Research Coordinator, R&D Department , Birmingham Women's and Children's NHS Foundation Trust                                                                                                            | Steelhouse Lane, Birmingham B4 6NH                                                                      |
| Mrs  | Charlotte Passingham | Research Co-ordinator                                    | Liver Unit, Birmingham Children's Hospital, Birmingham Women's and Children's NHS Foundation Trust                                                                                                                                   | Steelhouse Lane, Birmingham B4 6NH                                                                      |
| Mr   | Ravin Patel          | Medical Student                                          | University of Southampton                                                                                                                                                                                                            | University Rd, Southampton SO17 1BJ                                                                     |
| Dr   | Sanjay Patel         | Consultant Paediatric Infectious Diseases                | University Hospital Southampton NHS Foundation Trust                                                                                                                                                                                 | Tremona Road, Southampton, SO16 6YD                                                                     |



|      |                       |                                                        |                                                                                                                             |                                                                                                                  |
|------|-----------------------|--------------------------------------------------------|-----------------------------------------------------------------------------------------------------------------------------|------------------------------------------------------------------------------------------------------------------|
| Dr   | Margaret Peebles      | Consultant Paediatrician                               | Ninewells Hospital and Medical School                                                                                       | Dundee, DD1 9SY                                                                                                  |
| Dr   | Salina Persand        | Clinical Research Practitioner                         | Imperial College Healthcare NHS Trust and Imperial College London. Children's Clinical Research Facility                    |                                                                                                                  |
| Mrs  | Sharon Peters         | Paediatric Infectious Diseases Nurse Specialist        | North Manchester General Hospital                                                                                           | Delaunays Road, Manchester, M8 5RB                                                                               |
| Mrs  | Charlotte Phillips    | Team leader                                            | Childrens community Nursing Team, Kent community Health Foundation Trust                                                    | Trinity House, 110-12- Upper Pemberton, Kennington, Ashford, Kent, TN25 4AZ                                      |
| Mrs  | Helen Pidgeon         | Clinical Trials Assistant                              | Salisbury District Hospital                                                                                                 | Salisbury, Wiltshire, SP2 8BJ                                                                                    |
| Mrs  | Sue Power             | Paediatric Research Nurse                              | Poole Hospital NHS Foundation Trust                                                                                         | Longfleet Rd, Poole, BH15 2JB                                                                                    |
| Dr   | Evgenia Preka         | Consultant Paediatric Nephrologist                     | University Hospital Southampton NHS Foundation Trust                                                                        | Tremona Road, Southampton SO16 6YD                                                                               |
| Ms   | Vanessa Raimondo      | Clinical Nurse Specialist                              | Royal Hospital for Sick Children, Edinburgh                                                                                 | 9 Sciennes Road, Edinburgh, EH1 9LF                                                                              |
| Dr   | Jagadeesh Ramachandra | Consultant Paediatrician                               | Royal United Hospitals Bath NHS Foundation Trust                                                                            | Combe Park, Bath, BA1 3NG                                                                                        |
| Dr   | Ramya Ramanujachar    | Consultant Paediatric Oncology                         | University Hospital Southampton NHS Foundation Trust                                                                        | Tremona Road, Southampton, SO16 6YD                                                                              |
| Miss | Pernille Rasmussen    | Clinical Nurse Specialist Nephrology                   | Department of Paediatric Nephrology, Evelina London Children's Hospital, Guy's & St. Thomas' Foundation Hospitals NHS Trust | Westminster Bridge Road, London, SE1 7EH, UK                                                                     |
| Dr   | Trevor Richens        | Consultant Paediatric Cardiologist                     | University Hospital Southampton NHS Foundation Trust                                                                        | Tremona Road, Southampton, SO16 6YD                                                                              |
| Dr   | Valerie Rogers        | Consultant Paediatric Rheumatologist                   | University Hospital Bristol NHS Foundation trust                                                                            | Marlborough Street, Bristol, BS1 3NU                                                                             |
| Dr   | Erika Rojas-Jimenz    | Paediatric Research Clinical Fellow                    | Poole Hospital NHS Foundation Trust                                                                                         | Longfleet Rd, Poole, BH15 2JB                                                                                    |
| Dr   | Kevin Roman           | Consultant Paediatric Cardiologist                     | University Hospital Southampton NHS Foundation Trust                                                                        | Tremona Road, Southampton, SO16 6YD                                                                              |
| Ms   | Chloe Saad            | Clinical Research Assistant                            | University Hospital Lewisham                                                                                                | Paediatric Offices, Nockold House, University Hospital Lewisham, Lewisham High street, London, SE13 6LH          |
| Mr   | Stephen Saich         | CRF Clinical Research Project Manager                  | NIHR Southampton Clinical Research Facility, University Hospital Southampton NHS Foundation Trust                           | Tremona Road, Southampton, SO16 6YD                                                                              |
| Ms   | Rebecca Sarjeant      | Research Nurse                                         | Great North Children's Hospital                                                                                             | Royal Victoria Infirmary, Newcastle upon Tyne, NE1 4LP                                                           |
| Ms   | Paula Saunderson      | Clinical Trials Co-ordinator                           | Alder Hey Children's NHS Foundation Trust                                                                                   | Eaton Road, West Derby, Liverpool, L12 2AP                                                                       |
| Miss | Francesca Schiavone   | Clinical Nurse Specialist, Paediatric Gastroenterology | Morrison Hospital, Swansea Bay University Health Board                                                                      | Swansea, SA6 6NL                                                                                                 |
| Ms   | Beatrice Selby        | Clinical research coordinator                          | NIHR Southampton Clinical Research Facility, University Hospital Southampton NHS Foundation Trust                           | Tremona Road, Southampton SO16 6YD                                                                               |
| Dr   | Fiona Shackley        | Consultant Paediatric Infectious Diseases              | Sheffield Children's Hospital                                                                                               | Clarkson St, Broomhall, Sheffield S10 2TH                                                                        |
| Ms   | Jennifer Sharp        | Research Nurse                                         | Paediatric Research , Cambridge University Hospitals NHS Foundation Trust                                                   | Hills Road, Cambridge, CB2 0QQ                                                                                   |
| Dr   | Meera Shaunak         | Clinical Research Fellow                               | NIHR Southampton Clinical Research Facility, University Hospital Southampton NHS Foundation Trust                           | Tremona Road, Southampton, SO16 6YD                                                                              |
| Dr   | Mohan Shenoy          | Consultant Paediatric nephrologist                     | Royal Manchester Children's Hospital, Manchester University Hospitals NHS Trust,                                            | Royal Manchester Children's Hospital, Manchester University Hospitals NHS Trust, Oxford Rd Manchester M13 9WL UK |
| Dr   | Vinay Shivamurthy     | Consultant Paediatric Rheumatology                     | Evelina London Children's Hospital                                                                                          | Westminster Bridge Road London SE1 7EH                                                                           |
| Ms   | Theresa Simangan      | Senior Paediatric Research Nurse                       | Whipps Cross University Hospital, London                                                                                    | Whipps Cross Road, Leytonstone, London, E11 1NR                                                                  |

|      |                     |                                                   |                                                                                                                                                                                                                                                                                                                                                                                                            |                                                                                           |
|------|---------------------|---------------------------------------------------|------------------------------------------------------------------------------------------------------------------------------------------------------------------------------------------------------------------------------------------------------------------------------------------------------------------------------------------------------------------------------------------------------------|-------------------------------------------------------------------------------------------|
| Dr   | Jaspal Singh        | Paediatric Neurology Consultant                   | University Hospital Southampton NHS Foundation Trust                                                                                                                                                                                                                                                                                                                                                       | Tremona Road, Southampton, SO16 6YD                                                       |
| Mrs  | Samantha Small      | Paediatric Rheumatology Clinical Nurse Specialist | University Hospital Southampton NHS Foundation Trust                                                                                                                                                                                                                                                                                                                                                       | Tremona Road, Southampton SO16 6YD                                                        |
| Dr   | Ameenat Lola Solebo | Consultant Paediatric Ophthalmology               | Great Ormond Street Hospital for Children NHS Foundation Trust, Population, Policy & Practice Research & Teaching Department, University College London Great Ormond Street Institute of Child Health                                                                                                                                                                                                      | Great Ormond Street, London WC1N 3JH, 30 Guilford Street, London WC1N 1EH                 |
| Dr   | Helen Spencer       | Consultant in Transplant and Respiratory Medicine | Great Ormond Street Hospital for Children NHS Foundation Trust                                                                                                                                                                                                                                                                                                                                             | Great Ormond Street, London WC1N 3JH                                                      |
| Dr   | Isaac Staff         | Foundation Doctor                                 | James Paget University Hospital                                                                                                                                                                                                                                                                                                                                                                            | Lowestoft Rd, Gorleston, NR31 6LA                                                         |
| Dr   | Karnam Sugumar      | Consultant Paediatrician                          | Department of Child Health, Lancashire Teaching Hospitals NHS Trusts                                                                                                                                                                                                                                                                                                                                       | Royal Preston Hospital, Sharoe Green Lane, Preston PR2 9HT                                |
| Ms   | Zoe Swash           | Clinical research coordinator                     | NIHR Southampton Clinical Research Facility, University Hospital Southampton NHS Foundation Trust                                                                                                                                                                                                                                                                                                          | Tremona Road, Southampton, SO16 6YD                                                       |
| Dr   | Sneha Tandon        | Consultant Paediatric Haematologist               | University Hospital Southampton NHS Foundation Trust                                                                                                                                                                                                                                                                                                                                                       | Tremona Road, Southampton SO16 6YD                                                        |
| Dr   | Marc Tebruegge      | Consultant in infectious diseases and immunology  | Evelina London Children's Hospital                                                                                                                                                                                                                                                                                                                                                                         | Westminster Bridge Road London SE1 7EH                                                    |
| Ms   | Evelyn Thomson      | Research Nurse                                    | Great North Children's Hospital                                                                                                                                                                                                                                                                                                                                                                            | Royal Victoria Infirmary, Newcastle upon Tyne, NE1 4LP                                    |
| Dr   | Mark Tighe          | Consultant Paediatrician                          | Poole Hospital NHS Foundation Trust                                                                                                                                                                                                                                                                                                                                                                        | Longfleet Rd, Poole, BH15 2JB                                                             |
| Mrs  | Joanne Tomlinson    | Research Nurse                                    | University Hospitals of North Midlands NHS Trust                                                                                                                                                                                                                                                                                                                                                           | Staffordshire Children's Hospital at Royal Stoke, Newcastle Road, Stoke on Trent, ST4 6QG |
| Dr   | Nicola Trevelyan    | Consultant Paediatric Diabetologist               | University Hospital Southampton NHS Foundation Trust                                                                                                                                                                                                                                                                                                                                                       | Tremona Road, Southampton, SO16 6YD                                                       |
| Dr   | Brigitte Vollmer    | Paediatric Neurology Consultant                   | University Hospital Southampton NHS Foundation Trust                                                                                                                                                                                                                                                                                                                                                       | Tremona Road, Southampton, SO16 6YD                                                       |
| Dr   | Woolf Walker        | Paediatric Respiratory Consultant                 | PCD Centre, University Hospital Southampton NHS Foundation Trust, School of Clinical and Experimental Sciences, Faculty of Medicine and Institute for Life Sciences, University of Southampton, NIHR Southampton Biomedical Research Centre, University Hospital Southampton NHS Foundation Trust                                                                                                          | Tremona Road, Southampton SO16 6YD                                                        |
| Dr   | Jo Walsh            | Consultant Paediatric Rheumatology                | Royal Hospital for Children Glasgow                                                                                                                                                                                                                                                                                                                                                                        | 345 Govan Rd, Glasgow G51 4TF                                                             |
| Ms   | Rachel Wane         | Lead Research Nurse – Children's Team             | Bradford Teaching Hospitals NHS Foundation Trust                                                                                                                                                                                                                                                                                                                                                           | Duckworth Lane, Bradford, West Yorkshire, BD9 6RJ                                         |
| Dr   | Evangeline Wassmer  | Paediatric Neurology Consultant                   | Neurology Dept, Birmingham Children's Hospital, Birmingham Women's and Children's NHS Foundation Trust                                                                                                                                                                                                                                                                                                     | Steelhouse Lane, Birmingham B4 6NH                                                        |
| Mrs  | Elizabeth Waxman    | Paediatric Research Nurse Manager                 | Glasgow Clinical Research Facility                                                                                                                                                                                                                                                                                                                                                                         | 345 Govan Rd, Glasgow G51 4TF                                                             |
| Prof | Lucy R Wedderburn   | Consultant Paediatric Rheumatology                | Infection, Immunity and Inflammation Research & Teaching Department, University College London Great Ormond Street Institute of Child Health, Paediatric Rheumatology, Great Ormond Street Hospital NHS Foundation Trust, NIHR Great Ormond Street Hospital Biomedical Research Centre, Arthritis Research UK Centre for Adolescent Rheumatology, GOS Institute of Child Health, University College London | 30 Guilford Street, London, WC1N 1EH, Great Ormond Street, London WC1N 3JH                |
| Mrs  | Lucy Wellings       | Paediatric and Adolescent Research Nurse          | University College London NHS Foundation Trust                                                                                                                                                                                                                                                                                                                                                             | 3rd Floor Central, 250 Euston Road, London, NW1 2PG                                       |



|     |                     |                                              |                                                                                                          |                                                                 |
|-----|---------------------|----------------------------------------------|----------------------------------------------------------------------------------------------------------|-----------------------------------------------------------------|
| Dr  | Andrea Whitney      | Paediatric Neurology Consultant              | University Hospital Southampton NHS Foundation Trust                                                     | Tremona Road, Southampton, SO16 6YD                             |
| Dr  | Elizabeth Whittaker | Consultant Paediatric Infectious Diseases    | Imperial College Healthcare NHS Trust and Imperial College London. Children's Clinical Research Facility | 2nd Floor Cambridge Wing, Norfolk Place, London W2 1NY          |
| Mrs | Rachel Wiffen       | Paediatric Research Practitioner             | Nottingham Children's Hospital, Queen's Medical Centre, Nottingham University Hospitals NHS Trust        | Derby Road, Nottingham, NG72UH                                  |
| Mr  | Matthew Wilkins     | Clinical research coordinator                | NIHR Southampton Clinical Research Facility, University Hospital Southampton NHS Foundation Trust        | Tremona Road, Southampton SO16 6YD                              |
| Ms  | Jessica Williams    | Data Manager                                 | Great North Children's Hospital                                                                          | Royal Victoria Infirmary, Newcastle upon Tyne, NE1 4LP          |
| Dr  | Mark Wood           | Consultant Paediatric Rheumatology           | Leeds Children Hospital                                                                                  | Leeds Teaching Hospital NHS Trust, Great George Street, LS1 3EX |
| Mrs | Sophie Wool         | Research Nurse                               | Paediatric Oncology and Haematology, Cambridge University Hospitals NHS Foundation Trust                 | Hills Road, Cambridge, CB2 0QQ                                  |
| Ms  | Suzannah Wright     | Project Manager                              | Paediatric Infectious Diseases Research Group, St George's, University of London                         | Cranmer Terrace, London, SW17 0RE                               |
| Mrs | Wing Han Wu         | Clinical Research Coordinator                | Centre for Adolescent Rheumatology Versus Arthritis, University College London                           | 3rd Floor Central, 250 Euston Road, London, NW1 2PG             |
| Ms  | Caroline Youle      | Respiratory Nurse Specialist/ Research Nurse | Nottingham Children's Hospital, Queen's Medical Centre, Nottingham University Hospitals NHS Trust        | Derby Road, Nottingham, NG72UH                                  |
