# Supplementary material for: COVID-19 symptom surveillance in immunocompromised children and young people in the UK: a prospective observational cohort study
Source: PubMed Central journal article supplement — BMJ Open. 2021 Mar 17;11(3):e044899. doi: 10.1136/bmjopen-2020-044899 (PMC7977081; doi:10.1136/bmjopen-2020-044899), 2021-03-17
Supplement: bmjopen-2020-044899supp002.pdf [file bmjopen-2020-044899supp002.pdf]

**Appendix B: Participating Centres**

| <b>Participating centre</b>                   | <b>Number of Patients Recruited</b> | <b>%</b> |
|-----------------------------------------------|-------------------------------------|----------|
| University Hospital Southampton               | 163                                 | 10.99    |
| John Radcliffe Hospital Oxford                | 26                                  | 1.75     |
| Royal Manchester Children's Hospital          | 89                                  | 6.00     |
| Birmingham Women's and Children's Hospital    | 145                                 | 9.78     |
| Cardiff and Vale University Health Board      | 35                                  | 2.36     |
| Nottingham Children's Hospital                | 47                                  | 3.17     |
| Great North Children's Hospital               | 169                                 | 11.40    |
| Leeds General Infirmary Children's Hospital   | 18                                  | 1.21     |
| Bradford Teaching Hospital                    | 12                                  | 0.81     |
| Alder Hey Children's Hospital Liverpool       | 42                                  | 2.83     |
| Great Ormond Street Hospital                  | 176                                 | 11.87    |
| St Georges Hospital London                    | 30                                  | 2.02     |
| Sheffield Children's Hospital                 | 56                                  | 3.78     |
| Royal Hospital for Children Glasgow           | 57                                  | 3.84     |
| Royal Hospital for Sick Children Edinburgh    | 18                                  | 1.21     |
| University Hospital Coventry and Warwickshire | 23                                  | 1.55     |
| East Lancashire Hospitals NHS Trust           | 35                                  | 2.36     |
| Northern Manchester General Hospital          | 4                                   | 0.27     |
| Addenbrooke's Hospital Cambridge              | 49                                  | 3.30     |
| Swansea Bay University Health Board           | 2                                   | 0.13     |
| Ayrshire and Arran Health Board               | 4                                   | 0.27     |
| Norfolk and Norwich University Hospital       | 2                                   | 0.13     |
| Salisbury NHS Trust                           | 6                                   | 0.40     |
| University College London Hospitals           | 5                                   | 0.34     |
| James Paget University Hospital               | 23                                  | 1.55     |
| Kent Community Health                         | 10                                  | 0.67     |
| Royal Marsden Trust                           | 6                                   | 0.40     |
| Bristol Royal Hospital for Children           | 21                                  | 1.42     |
| Royal Alexandra Children's Hospital Brighton  | 13                                  | 0.88     |
| Tayside Children's Hospital                   | 15                                  | 1.01     |
| Royal Aberdeen Children's Hospital            | 25                                  | 1.69     |
| NHS Forth Valley                              | 2                                   | 0.13     |
| Royal United Hospitals Bath                   | 16                                  | 1.08     |
| Evelina London Children's Hospital            | 28                                  | 1.89     |
| NHS Lanarkshire                               | 47                                  | 3.17     |
| University Hospital North Midlands            | 11                                  | 0.74     |
| St Marys Hospital London                      | 3                                   | 0.20     |
| Lancashire Teaching Hospital                  | 2                                   | 0.13     |
| Kings College Hospital                        | 22                                  | 1.48     |
| Poole Hospital                                | 23                                  | 1.55     |
| Barts Health NHS Trust                        | 3                                   | 0.20     |
