# Supplementary material for: COVID-19 symptom surveillance in immunocompromised children and young people in the UK: a prospective observational cohort study
Source: PubMed Central journal article supplement — BMJ Open. 2021 Mar 17;11(3):e044899. doi: 10.1136/bmjopen-2020-044899 (PMC7977081; doi:10.1136/bmjopen-2020-044899), 2021-03-17
Supplement: bmjopen-2020-044899supp003.pdf [file bmjopen-2020-044899supp003.pdf]

## Appendix C: Weekly Questionnaire

| In the week beginning xx/xx/xxxx have you experienced any of the following symptoms? |                                                                                                                                                |                                                                                                                                                                                                                                                           |
|--------------------------------------------------------------------------------------|------------------------------------------------------------------------------------------------------------------------------------------------|-----------------------------------------------------------------------------------------------------------------------------------------------------------------------------------------------------------------------------------------------------------|
| 1.1                                                                                  | I have had no symptoms                                                                                                                         | <input type="radio"/> I have had no symptoms<br><input type="radio"/> I have had symptoms                                                                                                                                                                 |
| 1.2                                                                                  | Measured temperature above 38 °C                                                                                                               | <input type="radio"/> Yes<br><input type="radio"/> No                                                                                                                                                                                                     |
| 1.2.1                                                                                | <b>If 'Measured temperature above 38 °C' is equal to 'Yes' answer this question:</b><br>Which days did you measure a temperature above 38 °C?  | <input type="checkbox"/> Monday<br><input type="checkbox"/> Tuesday<br><input type="checkbox"/> Wednesday<br><input type="checkbox"/> Thursday<br><input type="checkbox"/> Friday<br><input type="checkbox"/> Saturday<br><input type="checkbox"/> Sunday |
| 1.2.2                                                                                | <b>If 'Measured temperature above 38 °C' is equal to 'Yes' answer this question:</b><br>Have you experienced a worsening of the above symptom? | <input type="radio"/> Yes<br><input type="radio"/> No                                                                                                                                                                                                     |
| 1.3                                                                                  | Cough                                                                                                                                          | <input type="radio"/> Yes<br><input type="radio"/> No                                                                                                                                                                                                     |
| 1.3.1                                                                                | <b>If 'Cough' is equal to 'Yes' answer this question:</b><br>Which days did you experience a cough?                                            | <input type="checkbox"/> Monday<br><input type="checkbox"/> Tuesday<br><input type="checkbox"/> Wednesday<br><input type="checkbox"/> Thursday<br><input type="checkbox"/> Friday<br><input type="checkbox"/> Saturday<br><input type="checkbox"/> Sunday |
| 1.3.2                                                                                | <b>If 'Cough' is equal to 'Yes' answer this question:</b><br>Have you experienced a worsening of the above symptom?                            | <input type="radio"/> Yes<br><input type="radio"/> No                                                                                                                                                                                                     |
| 1.4                                                                                  | Shortness of breath                                                                                                                            | <input type="radio"/> Yes<br><input type="radio"/> No                                                                                                                                                                                                     |
| 1.4.1                                                                                | <b>If 'Shortness of breath' is equal to 'Yes' answer this question:</b><br>Which days did you experience shortness of breath?                  | <input type="checkbox"/> Monday<br><input type="checkbox"/> Tuesday<br><input type="checkbox"/> Wednesday<br><input type="checkbox"/> Thursday<br><input type="checkbox"/> Friday<br><input type="checkbox"/> Saturday                                    |

|       |                                                                                                                                   |                                                                                                                                                                                                                                                           |
|-------|-----------------------------------------------------------------------------------------------------------------------------------|-----------------------------------------------------------------------------------------------------------------------------------------------------------------------------------------------------------------------------------------------------------|
|       |                                                                                                                                   | <input type="checkbox"/> Sunday                                                                                                                                                                                                                           |
| 1.4.2 | <b>If 'Shortness of breath' is equal to 'Yes' answer this question:</b><br>Have you experienced a worsening of the above symptom? | <input type="radio"/> Yes<br><input type="radio"/> No                                                                                                                                                                                                     |
| 1.5   | Sore throat                                                                                                                       | <input type="radio"/> Yes<br><input type="radio"/> No                                                                                                                                                                                                     |
| 1.5.1 | <b>If 'Sore throat' is equal to 'Yes' answer this question:</b><br>Which days did you experience sore throat?                     | <input type="checkbox"/> Monday<br><input type="checkbox"/> Tuesday<br><input type="checkbox"/> Wednesday<br><input type="checkbox"/> Thursday<br><input type="checkbox"/> Friday<br><input type="checkbox"/> Saturday<br><input type="checkbox"/> Sunday |
| 1.5.2 | <b>If 'Sore throat' is equal to 'Yes' answer this question:</b><br>Have you experienced a worsening of the above symptom?         | <input type="radio"/> Yes<br><input type="radio"/> No                                                                                                                                                                                                     |
| 1.6   | Blocked nose                                                                                                                      | <input type="radio"/> Yes<br><input type="radio"/> No                                                                                                                                                                                                     |
| 1.6.1 | <b>If 'Blocked nose' is equal to 'Yes' answer this question:</b><br>Which days did you experience blocked nose?                   | <input type="checkbox"/> Monday<br><input type="checkbox"/> Tuesday<br><input type="checkbox"/> Wednesday<br><input type="checkbox"/> Thursday<br><input type="checkbox"/> Friday<br><input type="checkbox"/> Saturday<br><input type="checkbox"/> Sunday |
| 1.6.2 | <b>If 'Blocked nose' is equal to 'Yes' answer this question:</b><br>Have you experienced a worsening of the above symptom?        | <input type="radio"/> Yes<br><input type="radio"/> No                                                                                                                                                                                                     |
| 1.7   | Red eyes                                                                                                                          | <input type="radio"/> Yes<br><input type="radio"/> No                                                                                                                                                                                                     |
| 1.7.1 | <b>If 'Red eyes' is equal to 'Yes' answer this question:</b><br>Which days did you experience red eyes?                           | <input type="checkbox"/> Monday<br><input type="checkbox"/> Tuesday<br><input type="checkbox"/> Wednesday<br><input type="checkbox"/> Thursday<br><input type="checkbox"/> Friday<br><input type="checkbox"/> Saturday<br><input type="checkbox"/> Sunday |
| 1.7.2 | <b>If 'Red eyes' is equal to 'Yes' answer this question:</b>                                                                      | <input type="radio"/> Yes<br><input type="radio"/> No                                                                                                                                                                                                     |

|        |                                                                                                                           |                                                                                                                                                                                                                                                           |
|--------|---------------------------------------------------------------------------------------------------------------------------|-----------------------------------------------------------------------------------------------------------------------------------------------------------------------------------------------------------------------------------------------------------|
|        | Have you experienced a worsening of the above symptom?                                                                    |                                                                                                                                                                                                                                                           |
| 1.8    | Headache                                                                                                                  | <input type="radio"/> Yes<br><input type="radio"/> No                                                                                                                                                                                                     |
| 1.8.1  | <b>If 'Headache' is equal to 'Yes' answer this question:</b><br>Which days did you experience headache?                   | <input type="checkbox"/> Monday<br><input type="checkbox"/> Tuesday<br><input type="checkbox"/> Wednesday<br><input type="checkbox"/> Thursday<br><input type="checkbox"/> Friday<br><input type="checkbox"/> Saturday<br><input type="checkbox"/> Sunday |
| 1.8.2  | <b>If 'Headache' is equal to 'Yes' answer this question:</b><br>Have you experienced a worsening of the above symptom?    | <input type="radio"/> Yes<br><input type="radio"/> No                                                                                                                                                                                                     |
| 1.9    | Joint pain                                                                                                                | <input type="radio"/> Yes<br><input type="radio"/> No                                                                                                                                                                                                     |
| 1.9.1  | <b>If 'Joint pain' is equal to 'Yes' answer this question:</b><br>Which days did you experience joint pain?               | <input type="checkbox"/> Monday<br><input type="checkbox"/> Tuesday<br><input type="checkbox"/> Wednesday<br><input type="checkbox"/> Thursday<br><input type="checkbox"/> Friday<br><input type="checkbox"/> Saturday<br><input type="checkbox"/> Sunday |
| 1.9.2  | <b>If 'Joint pain' is equal to 'Yes' answer this question:</b><br>Have you experienced a worsening of the above symptom?  | <input type="radio"/> Yes<br><input type="radio"/> No                                                                                                                                                                                                     |
| 1.10   | Muscle pain                                                                                                               | <input type="radio"/> Yes<br><input type="radio"/> No                                                                                                                                                                                                     |
| 1.10.1 | <b>If 'Muscle pain' is equal to 'Yes' answer this question:</b><br>Which days did you experience muscle pain?             | <input type="checkbox"/> Monday<br><input type="checkbox"/> Tuesday<br><input type="checkbox"/> Wednesday<br><input type="checkbox"/> Thursday<br><input type="checkbox"/> Friday<br><input type="checkbox"/> Saturday<br><input type="checkbox"/> Sunday |
| 1.10.2 | <b>If 'Muscle pain' is equal to 'Yes' answer this question:</b><br>Have you experienced a worsening of the above symptom? | <input type="radio"/> Yes<br><input type="radio"/> No                                                                                                                                                                                                     |
| 1.11   | Fatigue                                                                                                                   | <input type="radio"/> Yes<br><input type="radio"/> No                                                                                                                                                                                                     |

|        |                                                                                                                       |                                                                                                                                                                                                                                                           |
|--------|-----------------------------------------------------------------------------------------------------------------------|-----------------------------------------------------------------------------------------------------------------------------------------------------------------------------------------------------------------------------------------------------------|
| 1.11.1 | <b>If 'Fatigue' is equal to 'Yes' answer this question:</b><br>Which days did you experience fatigue?                 | <input type="checkbox"/> Monday<br><input type="checkbox"/> Tuesday<br><input type="checkbox"/> Wednesday<br><input type="checkbox"/> Thursday<br><input type="checkbox"/> Friday<br><input type="checkbox"/> Saturday<br><input type="checkbox"/> Sunday |
| 1.11.2 | <b>If 'Fatigue' is equal to 'Yes' answer this question:</b><br>Have you experienced a worsening of the above symptom? | <input type="radio"/> Yes<br><input type="radio"/> No                                                                                                                                                                                                     |
| 1.12   | Chills                                                                                                                | <input type="radio"/> Yes<br><input type="radio"/> No                                                                                                                                                                                                     |
| 1.12.1 | <b>If 'Chills' is equal to 'Yes' answer this question:</b><br>Which days did you experience chills?                   | <input type="checkbox"/> Monday<br><input type="checkbox"/> Tuesday<br><input type="checkbox"/> Wednesday<br><input type="checkbox"/> Thursday<br><input type="checkbox"/> Friday<br><input type="checkbox"/> Saturday<br><input type="checkbox"/> Sunday |
| 1.12.2 | <b>If 'Chills' is equal to 'Yes' answer this question:</b><br>Have you experienced a worsening of the above symptom?  | <input type="radio"/> Yes<br><input type="radio"/> No                                                                                                                                                                                                     |
| 1.13   | Nausea                                                                                                                | <input type="radio"/> Yes<br><input type="radio"/> No                                                                                                                                                                                                     |
| 1.13.1 | <b>If 'Nausea' is equal to 'Yes' answer this question:</b><br>Which days did you experience nausea?                   | <input type="checkbox"/> Monday<br><input type="checkbox"/> Tuesday<br><input type="checkbox"/> Wednesday<br><input type="checkbox"/> Thursday<br><input type="checkbox"/> Friday<br><input type="checkbox"/> Saturday<br><input type="checkbox"/> Sunday |
| 1.13.2 | <b>If 'Nausea' is equal to 'Yes' answer this question:</b><br>Have you experienced a worsening of the above symptom?  | <input type="radio"/> Yes<br><input type="radio"/> No                                                                                                                                                                                                     |
| 1.14   | Vomiting                                                                                                              | <input type="radio"/> Yes<br><input type="radio"/> No                                                                                                                                                                                                     |
| 1.14.1 | <b>If 'Vomiting' is equal to 'Yes' answer this question:</b><br>Which days did you experience vomiting?               | <input type="checkbox"/> Monday<br><input type="checkbox"/> Tuesday<br><input type="checkbox"/> Wednesday<br><input type="checkbox"/> Thursday<br><input type="checkbox"/> Friday                                                                         |

|        |                                                                                                                                       |                                                                                                                                                                                                                                                           |
|--------|---------------------------------------------------------------------------------------------------------------------------------------|-----------------------------------------------------------------------------------------------------------------------------------------------------------------------------------------------------------------------------------------------------------|
|        |                                                                                                                                       | <input type="checkbox"/> Saturday<br><input type="checkbox"/> Sunday                                                                                                                                                                                      |
| 1.14.2 | <b>If 'Vomiting' is equal to 'Yes' answer this question:</b><br>Have you experienced a worsening of the above symptom?                | <input type="radio"/> Yes<br><input type="radio"/> No                                                                                                                                                                                                     |
| 1.15   | Diarrhoea                                                                                                                             | <input type="radio"/> Yes<br><input type="radio"/> No                                                                                                                                                                                                     |
| 1.15.1 | <b>If 'Diarrhoea' is equal to 'Yes' answer this question:</b><br>Which days did you experience diarrhoea?                             | <input type="checkbox"/> Monday<br><input type="checkbox"/> Tuesday<br><input type="checkbox"/> Wednesday<br><input type="checkbox"/> Thursday<br><input type="checkbox"/> Friday<br><input type="checkbox"/> Saturday<br><input type="checkbox"/> Sunday |
| 1.15.2 | <b>If 'Diarrhoea' is equal to 'Yes' answer this question:</b><br>Have you experienced a worsening of the above symptom?               | <input type="radio"/> Yes<br><input type="radio"/> No                                                                                                                                                                                                     |
| 1.16   | Loss of smell or taste                                                                                                                | <input type="radio"/> Yes<br><input type="radio"/> No                                                                                                                                                                                                     |
| 1.16.1 | <b>If 'Loss of smell or taste' is equal to 'Yes' answer this question:</b><br>Which days did you experience loss of smell or taste?   | <input type="checkbox"/> Monday<br><input type="checkbox"/> Tuesday<br><input type="checkbox"/> Wednesday<br><input type="checkbox"/> Thursday<br><input type="checkbox"/> Friday<br><input type="checkbox"/> Saturday<br><input type="checkbox"/> Sunday |
| 1.16.2 | <b>If 'Loss of smell or taste' is equal to 'Yes' answer this question:</b><br>Have you experienced a worsening of the above symptom?  | <input type="radio"/> Yes<br><input type="radio"/> No                                                                                                                                                                                                     |
| 1.17   | Other symptoms                                                                                                                        |                                                                                                                                                                                                                                                           |
| 2.1    | Has your child changed medication this week?                                                                                          | <input type="radio"/> Yes<br><input type="radio"/> No                                                                                                                                                                                                     |
| 2.1.1  | <b>If 'Has your child changed medication this week?' if equal to 'Yes' answer this question:</b> What medication has changed and how? |                                                                                                                                                                                                                                                           |

|       |                                                                                                                                                                                                                                        |                                                                                                                                                                                                                |
|-------|----------------------------------------------------------------------------------------------------------------------------------------------------------------------------------------------------------------------------------------|----------------------------------------------------------------------------------------------------------------------------------------------------------------------------------------------------------------|
| 2.2   | Was your child in contact with someone who is diagnosed with or suspected to have coronavirus?                                                                                                                                         | <input type="radio"/> Yes<br><input type="radio"/> No<br><input type="radio"/> Not known                                                                                                                       |
| 2.3   | Did your child visit the NHS because you were worried about coronavirus infection?                                                                                                                                                     | <input type="radio"/> Yes<br><input type="radio"/> No<br><input type="radio"/> Not known                                                                                                                       |
| 2.4   | Did your child have a test for coronavirus?                                                                                                                                                                                            | <input type="radio"/> Yes<br><input type="radio"/> No<br><input type="radio"/> Not known                                                                                                                       |
| 2.5   | Did your child have a confirmed diagnosis of coronavirus infection?                                                                                                                                                                    | <input type="radio"/> Yes<br><input type="radio"/> No<br><input type="radio"/> Not known                                                                                                                       |
| 2.6   | Was your child admitted to hospital because of a coronavirus infection?                                                                                                                                                                | <input type="radio"/> Yes<br><input type="radio"/> No<br><input type="radio"/> Not known                                                                                                                       |
| 2.6.1 | <b>If 'Was your child admitted to hospital because of a coronavirus infection?' is equal to 'Yes' answer this question:</b> When was your child admitted?                                                                              | dd-mm-yyyy                                                                                                                                                                                                     |
| 2.6.2 | <b>If 'Was your child admitted to hospital because of a coronavirus infection?' is equal to 'Yes' answer this question:</b> How many days was your child admitted?                                                                     |                                                                                                                                                                                                                |
| 2.7   | Did you have to self-isolate your child because they had symptoms or because of medical advice related to coronavirus?                                                                                                                 | <input type="radio"/> Yes<br><input type="radio"/> No<br><input type="radio"/> Not known                                                                                                                       |
| 2.7.1 | <b>If 'Did you have to self-isolate your child because they had symptoms or because of medical advice related to coronavirus?' is equal to 'Yes' answer this question:</b><br>How many days did you self-isolate your child this week? | <input type="checkbox"/> 1<br><input type="checkbox"/> 2<br><input type="checkbox"/> 3<br><input type="checkbox"/> 4<br><input type="checkbox"/> 5<br><input type="checkbox"/> 6<br><input type="checkbox"/> 7 |
| 2.8   | Were immunosuppressive drugs postponed because of coronavirus infection?                                                                                                                                                               | <input type="radio"/> Yes<br><input type="radio"/> No<br><input type="radio"/> Not known                                                                                                                       |
| 2.8.1 | <b>If 'Were immunosuppressive drugs postponed because of coronavirus infection?' is equal to 'Yes' answer this question:</b> How many days did you                                                                                     | <input type="checkbox"/> 1<br><input type="checkbox"/> 2<br><input type="checkbox"/> 3<br><input type="checkbox"/> 4                                                                                           |

|        |                                                                                                                                                                                  |                                                                                                                                                                                                                |
|--------|----------------------------------------------------------------------------------------------------------------------------------------------------------------------------------|----------------------------------------------------------------------------------------------------------------------------------------------------------------------------------------------------------------|
|        | postpone the immunosuppressants this week?                                                                                                                                       | <input type="checkbox"/> 5<br><input type="checkbox"/> 6<br><input type="checkbox"/> 7                                                                                                                         |
| 2.9    | Did your child miss any sports or fun activities because of the coronavirus pandemic?                                                                                            | <input type="radio"/> Yes<br><input type="radio"/> No<br><input type="radio"/> Not known                                                                                                                       |
| 2.9.1  | <b>If 'Did your child miss any sports or fun activities because of the coronavirus pandemic?' is equal to Yes answer this question:</b> How many activities did your child miss? |                                                                                                                                                                                                                |
| 2.10   | Did your child miss school because of coronavirus infection?                                                                                                                     | <input type="radio"/> Yes<br><input type="radio"/> No<br><input type="radio"/> Not known                                                                                                                       |
| 2.10.1 | <b>If 'Did your child miss school because of coronavirus infection?' is equal to Yes answer this question:</b> How many days of school did your child miss this week?            | <input type="checkbox"/> 1<br><input type="checkbox"/> 2<br><input type="checkbox"/> 3<br><input type="checkbox"/> 4<br><input type="checkbox"/> 5<br><input type="checkbox"/> 6<br><input type="checkbox"/> 7 |
| 2.11   | On a scale of 0-10, how worried are you about coronavirus affecting your child? (0 = not worried, 10 = extremely worried)                                                        |                                                                                                                                                                                                                |
| 2.12   | Is there anything that you are particularly worried about that you would like to share?                                                                                          |                                                                                                                                                                                                                |
