# Supplementary material for: COVID-19 symptom surveillance in immunocompromised children and young people in the UK: a prospective observational cohort study
Source: PubMed Central journal article supplement — BMJ Open. 2021 Mar 17;11(3):e044899. doi: 10.1136/bmjopen-2020-044899 (PMC7977081; doi:10.1136/bmjopen-2020-044899), 2021-03-17
Supplement: bmjopen-2020-044899supp004.pdf [file bmjopen-2020-044899supp004.pdf]

## Appendix D:

### Symptom frequency by primary diagnosis

| Symptoms     | JIA (%) | Other rheumatology diagnosis (%) | Airways disease (%) | Immunodeficiency disorder (%) | Diabetes (%) | Solid organ or bone marrow transplant (%) | Nephrotic syndrome (%) | Other kidney disease (%) | IBD (%) | Other gastroenterology and hepatology (%) | Malignant haematology & oncology (%) | Neurology (%) | Other (%) |
|--------------|---------|----------------------------------|---------------------|-------------------------------|--------------|-------------------------------------------|------------------------|--------------------------|---------|-------------------------------------------|--------------------------------------|---------------|-----------|
| Fever        | 1.63    | 0.81                             | 0.24                | 0.73                          | 0.16         | 0.41                                      | 0.08                   | 0.08                     | 0.00    | 0.08                                      | 0.57                                 | 0.24          | 0.33      |
| Cough        | 4.80    | 1.54                             | 1.63                | 1.54                          | 0.24         | 1.46                                      | 0.57                   | 0.16                     | 0.08    | 0.00                                      | 0.89                                 | 0.16          | 0.65      |
| SOB          | 1.63    | 0.89                             | 0.65                | 0.65                          | 0.08         | 0.08                                      | 0.16                   | 0.08                     | 0.16    | 0.00                                      | 0.16                                 | 0.08          | 0.81      |
| Sore throat  | 6.02    | 2.28                             | 0.98                | 0.98                          | 0.16         | 0.41                                      | 0.24                   | 0.24                     | 0.49    | 0.33                                      | 0.89                                 | 0.33          | 0.89      |
| Blocked nose | 7.48    | 2.60                             | 1.79                | 1.30                          | 0.49         | 1.30                                      | 0.65                   | 0.41                     | 0.73    | 0.08                                      | 0.57                                 | 0.24          | 1.22      |
| Red eyes     | 4.07    | 2.11                             | 0.57                | 1.14                          | 0.49         | 0.41                                      | 0.49                   | 0.08                     | 0.33    | 0.08                                      | 0.57                                 | 0.16          | 0.57      |
| Headache     | 11.30   | 4.96                             | 1.30                | 2.20                          | 0.98         | 1.54                                      | 0.65                   | 0.33                     | 0.98    | 0.49                                      | 1.87                                 | 0.73          | 1.63      |
| Vomiting     | 3.66    | 0.89                             | 0.33                | 0.65                          | 0.08         | 0.89                                      | 0.24                   | 0.24                     | 0.00    | 0.16                                      | 1.14                                 | 0.08          | 0.98      |
| Diarrhoea    | 4.23    | 1.63                             | 0.57                | 1.46                          | 0.49         | 0.81                                      | 0.33                   | 0.33                     | 0.81    | 0.16                                      | 0.73                                 | 0.24          | 0.73      |
| Joint pain   | 19.84   | 3.98                             | 0.24                | 1.22                          | 0.16         | 1.30                                      | 0.65                   | 0.24                     | 0.81    | 0.08                                      | 1.87                                 | 0.41          | 1.06      |
| Muscle pain  | 8.46    | 3.33                             | 0.57                | 1.22                          | 0.33         | 1.06                                      | 0.65                   | 0.24                     | 0.49    | 0.16                                      | 1.38                                 | 0.33          | 0.81      |
| Fatigue      | 13.98   | 4.07                             | 1.30                | 2.60                          | 0.49         | 1.30                                      | 0.89                   | 0.57                     | 1.30    | 0.49                                      | 3.25                                 | 0.89          | 1.30      |
| Chills       | 2.11    | 1.06                             | 0.08                | 0.49                          | 0.08         | 0.41                                      | 0.08                   | 0.08                     | 0.24    | 0.16                                      | 0.33                                 | 0.33          | 0.24      |

Abbreviations: SOB shortness of breath, JIA juvenile idiopathic arthritis, IBD inflammatory bowel disease

## Symptom frequency by medication

| Symptoms      | Methotrexate (%) | Hydroxychloroquine (%) | Other DMARDs (%) | Corticosteroids (%) | Anti-TNF therapy (%) | Tocilizumab (%) | Other biologic drugs (%) | MMF (%) |
|---------------|------------------|------------------------|------------------|---------------------|----------------------|-----------------|--------------------------|---------|
| Fever         | 4.92             | 9.09                   | 0.92             | 5.62                | 4.62                 | 4.08            | 11.11                    | 5.34    |
| Cough         | 12.44            | 14.55                  | 9.17             | 14.06               | 15.84                | 4.08            | 8.33                     | 15.27   |
| SOB           | 3.11             | 3.64                   | 1.83             | 6.02                | 4.29                 | 8.16            | 5.56                     | 4.58    |
| Sore throat   | 16.06            | 21.82                  | 18.35            | 11.24               | 18.15                | 18.37           | 8.33                     | 10.69   |
| Blocked nose  | 19.69            | 25.45                  | 13.76            | 13.65               | 23.76                | 14.29           | 19.44                    | 17.56   |
| Red eyes      | 12.69            | 10.91                  | 8.26             | 10.44               | 11.55                | 14.29           | 13.89                    | 6.11    |
| Headache      | 29.27            | 45.45                  | 29.36            | 28.11               | 30.69                | 28.57           | 27.78                    | 25.19   |
| Vomiting      | 12.18            | 9.09                   | 4.59             | 12.05               | 8.25                 | 12.24           | 8.33                     | 7.63    |
| Diarrhoea     | 9.84             | 10.91                  | 11.93            | 11.65               | 11.88                | 20.41           | 8.33                     | 12.98   |
| Joint pain    | 43.78            | 43.64                  | 33.03            | 26.91               | 46.20                | 69.39           | 36.11                    | 22.14   |
| Muscle pain   | 20.98            | 41.82                  | 22.02            | 24.50               | 21.45                | 30.61           | 25.00                    | 19.08   |
| Fatigue       | 39.12            | 43.64                  | 29.36            | 34.14               | 34.65                | 40.82           | 38.89                    | 24.43   |
| Chills        | 5.44             | 12.73                  | 5.50             | 7.23                | 6.93                 | 6.12            | 5.56                     | 6.87    |
| Nausea        | 31.09            | 27.27                  | 15.60            | 20.88               | 25.41                | 26.53           | 16.67                    | 15.27   |
| Loss of smell | 0.52             | 1.82                   | 0.00             | 0.80                | 0.33                 | 0.00            | 0.00                     | 1.53    |

Abbreviations: DMARDs disease modifying anti-rheumatic drugs, MMF mycophenolate mofetil

| Symptoms      | Chemotherapy (%) | Azathioprine (%) | Other antibiotics and antivirals (%) | Tacrolimus (%) | Inhalers (%) | Insulin (%) | NSAIDs (%) | IV or SC IG (%) |
|---------------|------------------|------------------|--------------------------------------|----------------|--------------|-------------|------------|-----------------|
| Fever         | 10.29            | 7.35             | 7.14                                 | 3.80           | 8.14         | 3.66        | 9.72       | 2.63            |
| Cough         | 14.71            | 25.00            | 18.45                                | 15.19          | 31.40        | 8.54        | 15.28      | 13.16           |
| SOB           | 5.88             | 8.82             | 5.95                                 | 3.16           | 16.28        | 3.66        | 8.33       | 7.89            |
| Sore throat   | 8.82             | 13.24            | 10.71                                | 6.96           | 18.60        | 7.32        | 13.89      | 0.00            |
| Blocked nose  | 10.29            | 16.18            | 13.69                                | 14.56          | 36.05        | 9.76        | 25.00      | 10.53           |
| Red eyes      | 10.29            | 8.82             | 9.52                                 | 5.70           | 15.12        | 9.76        | 16.67      | 5.26            |
| Headache      | 27.94            | 32.35            | 20.83                                | 18.35          | 32.56        | 25.61       | 44.44      | 15.79           |
| Vomiting      | 22.06            | 10.29            | 14.29                                | 8.86           | 12.79        | 7.32        | 9.72       | 5.26            |
| Diarrhoea     | 14.71            | 10.29            | 13.10                                | 10.13          | 12.79        | 10.98       | 12.50      | 5.26            |
| Joint pain    | 29.41            | 14.71            | 20.24                                | 17.09          | 18.60        | 8.54        | 61.11      | 18.42           |
| Muscle pain   | 23.53            | 11.76            | 17.26                                | 14.56          | 19.77        | 7.32        | 31.94      | 7.89            |
| Fatigue       | 47.06            | 30.88            | 30.36                                | 18.35          | 30.23        | 17.07       | 54.17      | 18.42           |
| Chills        | 7.35             | 2.94             | 4.17                                 | 3.80           | 6.98         | 1.22        | 11.11      | 0.00            |
| Nausea        | 30.88            | 19.12            | 17.86                                | 12.66          | 20.93        | 10.98       | 27.78      | 10.53           |
| Loss of smell | 0.00             | 0.00             | 0.00                                 | 1.27           | 1.16         | 0.00        | 4.17       | 0.00            |

Abbreviations: NSAIDs non-steroid anti-inflammatory drugs, IV intravenous, SC subcutaneous, IG immunoglobulin
